# Supplementary material
Source: PubMed Central journal article supplement (PMC8461541)
Supplement: NIHMS1699451-supplement-Supplementary_Metrial.pdf [file NIHMS1699451-supplement-Supplementary_Metrial.pdf]

## Supplementary appendix

This appendix formed part of the original submission and has been peer reviewed. We post it as supplied by the authors.

Supplement to: Abou-Alfa GK, Sahai V, Antoine Hollebecque A, et al. Pemigatinib for previously treated, locally advanced or metastatic cholangiocarcinoma: a multicentre, open-label, phase 2 study. *Lancet Oncol* 2020; published online March 20. [http://dx.doi.org/10.1016/S1470-2045\(20\)30109-1](http://dx.doi.org/10.1016/S1470-2045(20)30109-1).

## Supplementary Appendix

### Pemigatinib for previously treated locally advanced or metastatic cholangiocarcinoma

*Ghassan K Abou-Alfa, Vaibhav Sahai, Antoine Hollebecque, Gina, Vaccaro, Davide Melisi, Raed Al-Rajabi, Andrew S Paulson, Mitesh J Borad, David Gallinson, Adrian G Murphy, Do-Youn Oh, Efrat Dotan, Daniel V Catenacci, Eric Van Cutsem, Tao Ji, Christine F Lihou, Huiling Zhen, Luis Féliz, Arndt Vogel*

#### Contents

|                                                                                                                                                                                                                                                                     |    |
|---------------------------------------------------------------------------------------------------------------------------------------------------------------------------------------------------------------------------------------------------------------------|----|
| FIGHT-202: List of FIGHT-202 investigators and recruitment numbers.....                                                                                                                                                                                             | 2  |
| Genomic analysis.....                                                                                                                                                                                                                                               | 4  |
| Management of hyperphosphataemia .....                                                                                                                                                                                                                              | 4  |
| Population pharmacokinetics analysis methodology .....                                                                                                                                                                                                              | 4  |
| Model development .....                                                                                                                                                                                                                                             | 4  |
| Exposure-response analysis methods .....                                                                                                                                                                                                                            | 5  |
| Relationship between exposure and change in serum phosphate concentration from baseline .....                                                                                                                                                                       | 5  |
| Relationship between exposure and change in serum phosphate from baseline with the proportion of patients with an objective response .....                                                                                                                          | 5  |
| Exposure-response analysis results.....                                                                                                                                                                                                                             | 6  |
| Relationship between exposure and changes in serum phosphate concentration from baseline .....                                                                                                                                                                      | 6  |
| Relationship between change in serum phosphate concentration from baseline and the proportion of patients with an objective response .....                                                                                                                          | 6  |
| Supplementary tables.....                                                                                                                                                                                                                                           | 6  |
| Table S1: Study sites .....                                                                                                                                                                                                                                         | 6  |
| Table S2: Rules for pemigatinib dose interruption and restarting .....                                                                                                                                                                                              | 7  |
| Table S3: Protocol deviations .....                                                                                                                                                                                                                                 | 8  |
| Table S4: Summary of therapies received immediately after discontinuing treatment in patients with available data .....                                                                                                                                             | 9  |
| Table S5: Summary of therapies received immediately prior to enrolment .....                                                                                                                                                                                        | 10 |
| Table S6: FGFR2 fusions or rearrangements in cohort A .....                                                                                                                                                                                                         | 11 |
| Table S7: All Causality AEs Across Cohorts (N=146)*.....                                                                                                                                                                                                            | 13 |
| Table S8: MedDRA preferred terms combined in definitions of clinically notable AEs .....                                                                                                                                                                            | 17 |
| Supplemental figures .....                                                                                                                                                                                                                                          | 18 |
| Figure S1: Duration of response – cohort A (assessed by independent reviewer) .....                                                                                                                                                                                 | 18 |
| Figure S2: Subgroup analysis of the proportion of patients with an objective response in cohort A, assessed by independent reviewer .....                                                                                                                           | 19 |
| Figure S3: Subgroup analysis of progression-free survival in cohort A .....                                                                                                                                                                                         | 20 |
| Figure S4: Best percentage change in target lesion size in individual patients enrolled in cohort B (panel A) and cohort C (panel B).....                                                                                                                           | 21 |
| Figure S5: Model predicted versus observed average serum phosphate concentration change from baseline at C1D8 and C1D15 following once-daily dosing of pemigatinib 13.5 mg* .....                                                                                   | 22 |
| Figure S6: Probability of response (the proportion of patients with an objective response) versus maximum phosphate concentration change from baseline at C1D8 and C1D15 following once-daily dosing of 13.5 mg pemigatinib in patients enrolled in cohort A* ..... | 23 |
| Figure S7: Line graph of mean ( $\pm$ SE) change from baseline for (A) phosphate, (B) 1,25-dihydroxyvitamin D3, and (C) parathyroid hormone over time (safety population): all cohorts .....                                                                        | 24 |
| References .....                                                                                                                                                                                                                                                    | 25 |
| FIGHT-202 Study Protocol .....                                                                                                                                                                                                                                      | 26 |

**FIGHT-202: List of FIGHT-202 investigators and recruitment numbers**

| Country        | Investigator              | Affiliation                                                                  | Patients Recruited,* n |
|----------------|---------------------------|------------------------------------------------------------------------------|------------------------|
| United States  | Vaibhav Sahai             | University of Michigan Cancer Center                                         | 8                      |
| France         | Antoine Hollebecque       | Institute Gustave Roussy (IGR)                                               | 7                      |
| United States  | Charles Lopez             | Oregon Health & Science University                                           | 7                      |
| United States  | Raed Al-Rajabi            | University of Kansas Cancer Center                                           | 7                      |
| United States  | Daniel Catenacci          | University of Chicago Medical Center                                         | 6                      |
| Korea          | Do-Youn Oh                | Seoul National University Hospital                                           | 5                      |
| United States  | Andrew Paulson            | Texas Oncology-Baylor Charles A. Sammons                                     | 5                      |
| Italy          | Davide Melisi             | Azienda Ospedaliera Di Verona-Policlinico G.B. Rossi                         | 4                      |
| United States  | Adrian Murphy             | Sidney Kimmel Cancer Center                                                  | 4                      |
| United States  | David Gallinson           | Summit Medical Group                                                         | 4                      |
| Germany        | Arndt Vogel               | Hannover Medical School                                                      | 3                      |
| Spain          | Teresa Macarulla Mercade  | Hospital General Universitari Vall d'Hebron                                  | 3                      |
| United States  | Efrat Dotan               | Fox Chase Cancer Center                                                      | 3                      |
| United States  | Ghassan Abou-Alfa         | Memorial Sloan Kettering Cancer Center                                       | 3                      |
| United States  | Hani Babiker              | University of Arizona Cancer Center                                          | 3                      |
| United States  | Mitesh Borad              | Mayo Clinic Hospital                                                         | 3                      |
| United States  | Paul Oberstein            | Perlmutter Cancer Center                                                     | 3                      |
| United States  | Sam Lubner                | University of Wisconsin Hospital and Clinic                                  | 3                      |
| United States  | Takefumi Komiya           | Parkview Research Center                                                     | 3                      |
| Israel         | Ayala Hubert              | Hadassah Hebrew University Medical Center Ein Karem Hadassah                 | 2                      |
| Italy          | Luca Gianni               | Ospedale San Raffaele                                                        | 2                      |
| Japan          | Makoto Ueno               | Kanagawa Cancer Center                                                       | 2                      |
| Korea          | Woo Jin Lee               | National Cancer Center                                                       | 2                      |
| Korea          | Yeul Hong Kim             | Korea University Anam Hospital                                               | 2                      |
| Thailand       | Busyamas Chewaskulyong    | Maharaj Nakorn Chiang Mai Hospital                                           | 2                      |
| United Kingdom | Mairead Mcnamara          | The Christie NHS Foundation Trust                                            | 2                      |
| United States  | Allen Cohn                | Rocky Mountain Cancer Center                                                 | 2                      |
| United States  | Bassam Estfan             | Cleveland Clinic                                                             | 2                      |
| United States  | Donald Richards           | Texas Oncology - Tyler                                                       | 2                      |
| United States  | Irina Dobrosotskaya       | Henry Ford Health System                                                     | 2                      |
| United States  | Minal Barve               | Mary Crowley Cancer Research Center                                          | 2                      |
| United States  | Philip Gold               | Swedish Cancer Institute                                                     | 2                      |
| United States  | Stacey Stein              | Yale New Haven Hospital                                                      | 2                      |
| Belgium        | Anne Demols               | ULB Hôpital Erasme                                                           | 1                      |
| Belgium        | Philippe Vergauwe         | AZ Groeninge - Campus Kennedylaan                                            | 1                      |
| France         | Carlos Alberto Gomez-Roca | Institut Claudius Regaud Oncopole Toulouse                                   | 1                      |
| France         | Eric Assenat              | Hôpital Saint Eloi                                                           | 1                      |
| France         | Laurent Mineur            | Institut Sainte Catherine                                                    | 1                      |
| Germany        | Gunnar Folprecht          | University Clinic Carl Gustav Carus, Technical University Dresden            | 1                      |
| Germany        | Marianne Sinn             | Charite Universitaetsmedizin Berlin - Campus Charite Mitte                   | 1                      |
| Israel         | Ravit Geva                | Tel Aviv Sourasky Medical Center                                             | 1                      |
| Italy          | Guglielmo Nasti           | Istituto Nazionale Tumori IRCCS Fondazione G. Pascale                        | 1                      |
| Italy          | Michele Maio              | Azienda Ospedaliera Universitaria Senese Policlinico Santa Maria Alle Scotte | 1                      |
| Korea          | Heung-Moon Chang          | Asan Medical Center                                                          | 1                      |
| Korea          | Jin-Hyeok Hwang           | Seoul National University Bundang Hospital                                   | 1                      |
| Korea          | Seungmin Bang             | Severance Hospital Yonsei University Health System                           | 1                      |
| Spain          | Marta Martin Richard      | Hospital de la Santa Creu i Sant Pau                                         | 1                      |
| Taiwan         | Li-Yuan Bai               | China Medical University Hospital                                            | 1                      |
| Thailand       | Kritiya Butthongkomvong   | Udonthani Cancer Hospital                                                    | 1                      |
| Thailand       | Krittaya Korphaisarn      | Siriraj Hospital                                                             | 1                      |
| United Kingdom | Daniel Palmer             | The Clatterbridge Cancer Centre                                              | 1                      |
| United Kingdom | Debashis Sarker           | Guy's and St Thomas' NHS Foundation Trust                                    | 1                      |
| United Kingdom | Harpreet Wasan            | Imperial College Healthcare NHS Trust - Hammersmith Hospital                 | 1                      |
| United Kingdom | Kein Yim                  | Velindre Cancer Centre                                                       | 1                      |
| United States  | Anthony Shields           | Karmanos Cancer Institute                                                    | 1                      |
| United States  | David Imagawa             | Chao Family Comprehensive Cancer Center University of California, Irvine     | 1                      |
| United States  | Ignacio Garrido Laguna    | Huntsman Cancer Institute at University of Utah                              | 1                      |
| United States  | Justin Favaro             | Oncology Specialists of Charlotte                                            | 1                      |

|                |                           |                                                                                                  |   |
|----------------|---------------------------|--------------------------------------------------------------------------------------------------|---|
| United States  | Kristi McIntyre           | Texas Oncology - Dallas Presbyterian Hospital                                                    | 1 |
| United States  | Manik Amin                | Washington University School of Medicine                                                         | 1 |
| United States  | Marcus Noel               | University of Rochester, James P. Wilmot Cancer Center                                           | 1 |
| United States  | Mark Johns                | Oncology Hematology Care, Inc.                                                                   | 1 |
| United States  | Mike Cusnir               | Mount Sinai Medical Center Comprehensive Cancer Center                                           | 1 |
| United States  | Paul Ritch                | Medical College of Wisconsin                                                                     | 1 |
| United States  | Sarah Davis               | Anschutz Cancer Pavilion - University of Colorado                                                | 1 |
| United States  | Stefano Tarantolo         | Midwest Cancer Center & Nebraska Cancer Specialists                                              | 1 |
| United States  | Thomas George             | University of Florida Health Shands Hospital                                                     | 1 |
| Belgium        | Eric Van Cutsem           | UZ Leuven                                                                                        | 0 |
| Belgium        | Francesco Puleo           | Institut Jules Bordet                                                                            | 0 |
| Belgium        | Stephanie Laurent         | Universitair Ziekenhuis Gent                                                                     | 0 |
| France         | Eric Vibert               | Hôpital Paul-Brousse                                                                             | 0 |
| France         | Olivier Rosmorduc         | Hôpital Universitaire Pitié-Salpêtrière                                                          | 0 |
| France         | Romain Coriat             | A.P.H. Paris Hôpital Cochin                                                                      | 0 |
| France         | Sandrine Faivre           | Hôpital Beaujon                                                                                  | 0 |
| Germany        | Albrecht Hoffmeister      | Universitätsklinikum Leipzig AöR                                                                 | 0 |
| Germany        | Frank Lammert             | Universitätsklinikum des Saarlandes                                                              | 0 |
| Germany        | Harald Schmalenberg       | Krankenhaus Dresden-Friedrichstadt                                                               | 0 |
| Germany        | Marcus Woerns             | Universitätsmedizin Der Johannes Gutenberg-Universität Mainz, III                                | 0 |
| Germany        | Maria Gonzalez Carmona    | Universitätsklinikum Bonn Aoer                                                                   | 0 |
| Germany        | Michael Bitzer            | Universitaetsklinikum Tubingen                                                                   | 0 |
| Israel         | Einat Shacham-Shmueli     | Sheba Medical Center                                                                             | 0 |
| Israel         | Salomon Stemmer           | Rabin Medical Center - Beilinson Hospital                                                        | 0 |
| Italy          | Alba Brandes              | Ospedale Bellaria                                                                                | 0 |
| Italy          | Emiliano Tamburini        | Ospedale Degli Infermi - Rimini                                                                  | 0 |
| Italy          | Evaristo Maiello          | I.R.C.C.S. Casa Sollievo Della Sofferenza                                                        | 0 |
| Italy          | Francesco Leone           | Fondazione Del Piemonte Per L'Oncologia IRCC Candiolo                                            | 0 |
| Italy          | Giammarco Surico          | Presidio Ospedaliero Vito Fazzi                                                                  | 0 |
| Italy          | Gianluigi Giannelli       | Azienda Ospedaliera Saverio de Bellis                                                            | 0 |
| Italy          | Giovanni Luca Frassinetti | Istituto Scientifico Romagnolo per lo Studio e la Cura dei Tumori                                | 0 |
| Italy          | Mario Mandala             | Ospedale Papa Giovanni XXIII                                                                     | 0 |
| Italy          | Roberto Bordonaro         | Presidio Ospedaliero Garibaldi Nesima                                                            | 0 |
| Italy          | Stefano Tamberi           | Ospedale Degli Infermi - Faenza                                                                  | 0 |
| Japan          | Kazuya Sugimori           | Yokohama City University Medical Center                                                          | 0 |
| Japan          | Kentaro Sudo              | Chiba Cancer Center                                                                              | 0 |
| Japan          | Manabu Muto               | Kyoto University Hospital                                                                        | 0 |
| Japan          | Masato Ozaka              | Cancer Institute Hospital of JFCR                                                                | 0 |
| Japan          | Masatoshi Kudo            | Kindai University Hospital                                                                       | 0 |
| Japan          | Masayuki Furukawa         | National Hospital Organization Kyushu Cancer Center                                              | 0 |
| Japan          | Naoya Kato                | Chiba University Hospital                                                                        | 0 |
| Japan          | Satoshi Shimizu           | Saitama Cancer Center                                                                            | 0 |
| Japan          | Takamichi Kuwahara        | Aichi Cancer Center Hospital                                                                     | 0 |
| Japan          | Tatsuya Ioka              | Osaka International Cancer Institute                                                             | 0 |
| Japan          | Tomoya Yokota             | Shizuoka Cancer Center                                                                           | 0 |
| Japan          | Yasuo Hamamoto            | Keio University Hospital                                                                         | 0 |
| Korea          | Joon Oh Park              | Samsung Medical Center                                                                           | 0 |
| Korea          | Young Koog Cheon          | Konkuk University Medical Center                                                                 | 0 |
| Spain          | Adelaida Garcia Velasco   | Ico Girona                                                                                       | 0 |
| Spain          | Andres Muñoz Martin       | Hospital General Universitario Gregorio Marañon                                                  | 0 |
| Spain          | Bruno Sangro Gomez Acebo  | Clinica Universidad De Navarra (CUN)                                                             | 0 |
| Spain          | Carmen Guillen Ponce      | Hospital Universitario Ramon Y Cajal                                                             | 0 |
| Taiwan         | Chia-Jui Yen              | National Cheng Kung University (NCKU) Hospital                                                   | 0 |
| Taiwan         | Chih-Hung Hsu             | National Taiwan University Hospital                                                              | 0 |
| Taiwan         | Yee Chao                  | Taipei Veterans General Hospital                                                                 | 0 |
| Thailand       | Luangyot Thongthieang     | Khon Kaen Hospital                                                                               | 0 |
| Thailand       | Narong Khuntikeo          | Srinagarind Hospital                                                                             | 0 |
| Thailand       | Suebpong Tanasanvimon     | King Chulalongkorn Memorial Hospital                                                             | 0 |
| United Kingdom | Bristi Basu               | Addenbrooke's Hospital                                                                           | 0 |
| United Kingdom | Jeff Evans                | Beatson West of Scotland Cancer Centre                                                           | 0 |
| United Kingdom | Jonathan Wadsley          | Weston Park Hospital                                                                             | 0 |
| United Kingdom | Kathryn Connolly          | Aberdeen Royal Infirmary                                                                         | 0 |
| United Kingdom | Tamas Hickish             | The Royal Bournemouth and Christchurch Hospitals NHS Foundation Trust-Royal Bournemouth Hospital | 0 |
| United States  | Aiwu He                   | Georgetown University Hospital                                                                   | 0 |

|               |                  |                                                           |   |
|---------------|------------------|-----------------------------------------------------------|---|
| United States | Allyson Harroff  | Texas Oncology-San Antonio Stone Oak                      | 0 |
| United States | Amit Mahipal     | Mayo Clinic Rochester                                     | 0 |
| United States | Anwar Khurshid   | Texas Oncology                                            | 0 |
| United States | Ari Baron        | Pacific Hematology & Oncology                             | 0 |
| United States | Barry Brooks     | Texas Oncology - Medical City Dallas                      | 0 |
| United States | Daniel Gruenberg | Compass Oncology The Northwest Cancer Specialists         | 0 |
| United States | Davendra Sohal   | Cleveland Clinic                                          | 0 |
| United States | Donald Wender    | Siouxland Hematology-Oncology Associates, LLP             | 0 |
| United States | James Atkins     | Southeastern Medical Oncology Center                      | 0 |
| United States | Jocelyn Tan      | VA Pittsburgh Healthcare System                           | 0 |
| United States | Jonathan Bleeker | Sanford Cancer Center - Sioux Falls                       | 0 |
| United States | Kabir Mody       | Mayo Clinic Florida                                       | 0 |
| United States | Karin Armstrong  | Minnesota Oncology Hematology, PA                         | 0 |
| United States | Mary Crow        | Renovatio Clinical                                        | 0 |
| United States | Max Sung         | Mount Sinai Hospital                                      | 0 |
| United States | Michael Guarino  | Christiana Care Helen F. Graham Cancer Center             | 0 |
| United States | Muhammad Beg     | University of Texas Southwestern Medical Center           | 0 |
| United States | Musaberk Goksel  | Alaska Urological Institute                               | 0 |
| United States | Patrick Cobb     | St. Vincent Healthcare Cancer Center                      | 0 |
| United States | Raymond Wadlow   | Virginia Cancer Specialists-Fairfax                       | 0 |
| United States | Robert Marsh     | Northshore University Health System                       | 0 |
| United States | Shachi Gupta     | Arizona Oncology Associates                               | 0 |
| United States | Thomas Anderson  | Texas Oncology - Grapevine                                | 0 |
| United States | Thomas Harris    | Texas Oncology, PA - Waco                                 | 0 |
| United States | Vivek Sharma     | University of Louisville James Graham Brown Cancer Center | 0 |

\*As of the data cut off date (March 22, 2019)

### Genomic analysis

Comprehensive genomic profiling was performed using the FoundationOne® assay, which uses hybrid capture-based DNA target enrichment to identify somatic genomic alterations in the coding regions of 315 cancer-related genes and introns from 28 genes often rearranged in cancer. Detected somatic alterations include base substitutions, insertions, deletions, copy number alterations, and rearrangements.

Rearrangements involving *FGFR2* are further classified as fusions if the genomic breakpoint is within the intron 17/exon 18 hotspot and the gene partner is known in the literature or is a novel partner that is predicted to be in-frame with *FGFR2*. Other reported *FGFR2* rearrangements include those with genomic breakpoint in the *FGFR2* intron 17/exon 18 hotspot but with (1) a novel partner gene that is predicted to be out-of-frame or out-of-strand, or (2) no partner gene (designated as partner N/A or intron 17 rearrangement).

### Management of hyperphosphataemia

Hyperphosphataemia was managed using one or more of the following strategies: (1) a low phosphate diet (initiated if serum phosphate level >5.5 mg/dL and ≤7 mg/dL); (2) phosphate binders (a low phosphate diet was initiated/continued and phosphate-binding therapy initiated once serum phosphate level was >7 mg/dL); (3) diuretics (a low phosphate diet was continued, phosphate-binding therapy adjusted, and a phosphaturic agent was started/continued). Serum phosphate monitoring was continued for at least twice a week until a return to normal range was achieved.

### Population pharmacokinetics analysis methodology

#### Model development

Pharmacokinetic samples were obtained at cycle (C) 1 day (D) 8: predose, 1–2 hours postdose, and 4–12 hours postdose. A total of 392 plasma pemigatinib concentration records from 136 patients with cholangiocarcinoma enrolled in study FIGHT-202 were available for population pharmacokinetic (PK) modelling. The population PK was performed using the pooled PK data from the present FIGHT-202 study as well as from FIGHT-101 (a phase 1/2 dose-escalation and dose-expansion study in patients with advanced malignancies [NCT02393248])<sup>1</sup> and FIGHT-102 (a phase 1 monotherapy study in Japanese patients with advanced malignancies [NCT03235570]).<sup>2</sup>

The population PK analysis was performed using NONMEM® (Version 7.4.1, Icon development Solutions, Ellicott City, Maryland, USA). One- and two-compartment disposition models with first-order absorption and linear

elimination were tested to build base structural model for participants with cancer. The candidate covariates (subject demographics, disease-related variables, and clinical laboratory variables) were incorporated into the PK model as fixed-effect parameters by making the typical values of the structural PK parameters a function of the covariate. NONMEM regression analysis was performed on the model with covariate parameters being added in a stepwise univariate fashion during the forward selection process and subtracted stepwise in the model reduction (backward elimination) process. The Likelihood Ratio Test was used to evaluate the significance of incorporating parameters into or removing parameters from the population model. The accuracy and robustness of the final population PK model was investigated using a visual predictive check method.

### **Exposure-response analysis methods**

For pemigatinib exposure and change in serum phosphate from baseline, exploratory analyses of association between the three exposure parameters (steady-state maximal concentration [ $C_{max,ss}$ ], steady-state maximal concentration [ $C_{min,ss}$ ], and steady-state area under the curve [ $AUC_{ss}$ ]) and the responses were performed, and the one with the strongest association was chosen, based on objective function criteria, for the exposure-response modelling. In addition, change of serum phosphate from baseline following treatment of pemigatinib and the proportion of patients with an objective response was also evaluated.

#### ***Relationship between exposure and change in serum phosphate concentration from baseline***

A total of 136 patients having both PK and serum phosphate records were included in the analysis dataset. The average serum phosphate concentration of C1D8 and C1D15 change from baseline and population PK model-simulated pemigatinib steady-state exposure ( $C_{max,ss}$ ,  $C_{min,ss}$ , and  $AUC_{ss}$ ) from FIGHT-202 were used for analysis.

A basic  $E_{max}$  model was evaluated to characterise the average serum phosphate concentrations of C1D8 and C1D15 change from baseline as a function of pemigatinib steady-state exposures ( $C_{max}$ ,  $C_{min}$ , and  $AUC$ ). The structural  $E_{max}$  model was parameterised in terms of the maximum change in serum phosphate concentration from baseline attributed to pemigatinib ( $E_{max}$ ) and the exposure of pemigatinib producing 50% of the maximum increase in serum phosphate concentration ( $EC_{50}$ ).

$$E = \frac{Emax \times EXPOSURE}{EC50 + EXPOSURE}$$

The  $E_{max}$  modelling was conducted using PROC NLIN in SAS v9.4.

#### ***Relationship between exposure and change in serum phosphate from baseline with the proportion of patients with an objective response***

Serum phosphate concentrations were measured as part of a comprehensive serum chemistry assessment. In study INCB 54828-202, serum chemistry samples were collected on days 1, 8, and 15 in cycle 1, and day 1 in cycle 2+. A total of 107 participants from FIGHT-202 cohort A (cholangiocarcinoma with *FGFR2* rearrangement or fusion) were included in the analysis dataset. The average serum phosphate concentration of C1D8 and C1D15 change from baseline and efficacy endpoint (proportion of patients with an objective response) from study FIGHT-202 cohort A were used for analysis.

A logistic regression model was used to evaluate the relationship of change of serum phosphate from baseline following treatment of pemigatinib and the occurrence of dichotomous response such as responder versus nonresponder.

The relationships were described by binary logistic regression model with quadratic function. The form of the function for the analysis of the proportion of patients with an objective response is as follows:

$$\text{Logit (objective response)} = \log (\text{Pr (event | X)} / \text{Pr (nonevent | X)}) = a + b*X + C*X^2$$

Where  $\text{Pr (event | X)}$  is the probability of occurrence of object response and  $\text{Pr (nonevent | X)}$  is the probability of no occurrence of a response.

PROC NLMIXED in SAS v9.4 was used for Logit-quadratic Model.

## Exposure-response analysis results

### *Relationship between exposure and changes in serum phosphate concentration from baseline*

Whereas the correlations of all pemigatinib steady-state exposures and change in serum phosphate concentration could be described by  $E_{\max}$  model,  $AUC_{ss}$  was identified to have the strongest association with change of serum phosphate from baseline based on objective function criteria (233·3147, 249·2531, and 246·8868 for  $AUC_{ss}$ ,  $C_{\max,ss}$ , and  $C_{\min,ss}$ , respectively). Figure S4 shows model-predicted versus observed relationship of pemigatinib steady-state AUC and serum phosphate concentration change from baseline.

The model demonstrated that the increase in serum phosphate observed after treatment with pemigatinib was exposure-dependent and followed a sigmoidal relationship. The estimated maximum serum phosphate concentration change from baseline after treatment of pemigatinib was 5·02 mg/dL. The estimated  $EC_{50}$  was 2024 h·nM (steady-state AUC of pemigatinib), which corresponds to mean  $AUC_{ss}$  from an approximately 10·5 mg dose of pemigatinib. The mean baseline serum phosphate concentration was 3·67 mg/dL and estimated the maximum serum phosphate concentration after treatment of pemigatinib ( $baseline + E_{\max}$ ) was 8·69 mg/dL.

### *Relationship between change in serum phosphate concentration from baseline and the proportion of patients with an objective response*

The relationship of change in serum phosphate concentration from baseline and the proportion of patients with an objective response followed a bell-shaped curve, and a binary logistic regression model with quadratic function was developed to evaluate the relationship (figure S8). The other variables such as the serum phosphate concentration at C1D15, maximum serum phosphate concentration at C1D8 and C1D15, and serum phosphate concentration at C1D15 change from baseline were also explored but no clear pattern of exposure-response relationship could be identified.

The exposure-response modelling showed that both maximum serum phosphate concentration change from baseline and pemigatinib exposures can be used to model the proportion of patients with an objective response. The bell-shaped phosphate response relationship shown in figure S9 suggests that the proportion of patients with an objective response increases before a critical value of serum phosphate concentration change from baseline/pemigatinib exposures and then decreases after it. The range of serum phosphate change from baseline was 0·5–6·3 mg/dL. The model-predicted the proportion of patients with an objective response at doses of 6 mg, 9 mg, 13·5 mg, and 20 mg were 26%, 29%, 44%, and 45%, respectively. The models suggested that pemigatinib 13·5 mg is an optimal starting dose for treatment of patients with cholangiocarcinoma. The decrease in the proportion of patients with an objective response observed in the highest quartile may reflect a relatively high incidence rate of dose interruption and dose reduction when the serum phosphate concentration change from baseline is higher than 3 mg/dL.

## Supplementary tables

**Table S1: Study sites**

| Country        | Number of sites, n* | Patients enrolled, n (%) |                 |                 |                            |
|----------------|---------------------|--------------------------|-----------------|-----------------|----------------------------|
|                |                     | Cohort A (n=107)         | Cohort B (n=20) | Cohort C (n=18) | Total (N=146) <sup>†</sup> |
| Belgium        | 5                   | 2 (2)                    | 0               | 0               | 2 (1)                      |
| France         | 8                   | 10 (9)                   | 0               | 0               | 10 (7)                     |
| Germany        | 9                   | 5 (5)                    | 0               | 0               | 5 (3)                      |
| Israel         | 4                   | 3 (3)                    | 0               | 0               | 3 (2)                      |
| Italy          | 14                  | 8 (7)                    | 0               | 0               | 8 (5)                      |
| Japan          | 13                  | 2 (2)                    | 0               | 0               | 2 (1)                      |
| Korea          | 8                   | 5 (5)                    | 7 (35)          | 0               | 12 (8)                     |
| Spain          | 6                   | 1 (1)                    | 3 (15)          | 0               | 4 (3)                      |
| Taiwan         | 4                   | 0                        | 1 (5)           | 0               | 1 (1)                      |
| Thailand       | 6                   | 1 (1)                    | 3 (15)          | 0               | 4 (3)                      |
| United Kingdom | 10                  | 6 (6)                    | 0               | 0               | 6 (4)                      |
| United States  | 59                  | 64 (60)                  | 6 (30)          | 18 (100)        | 89 (61)                    |

\* The number of sites shown in the table includes all sites open for enrolment.

<sup>†</sup> The total includes one patient who did not have confirmed *FGF/FGFR* status by central laboratory and was not assigned to any cohort.

**Table S2: Rules for pemigatinib dose interruption and restarting**

| Adverse Event                                                                                                                             | Action Taken                                                                                                                                                                                                                                                                                                                                              |
|-------------------------------------------------------------------------------------------------------------------------------------------|-----------------------------------------------------------------------------------------------------------------------------------------------------------------------------------------------------------------------------------------------------------------------------------------------------------------------------------------------------------|
| <ul style="list-style-type: none"> <li>• AST and/or ALT is <math>&gt;5.0 \times \text{ULN}</math></li> </ul>                              | <ul style="list-style-type: none"> <li>• <b>Step 1:</b> Interrupt pemigatinib dosing for up to 14 days, until the toxicity has resolved to <math>\leq</math> grade 1</li> <li>• <b>Step 2:</b> Restart pemigatinib at the same dose. If assessed as treatment-related, restart pemigatinib at next lower dose; monitor as clinically indicated</li> </ul> |
| <ul style="list-style-type: none"> <li>• Any grade 1 or grade 2 toxicity</li> </ul>                                                       | <ul style="list-style-type: none"> <li>• Continue pemigatinib treatment and treat the toxicity; monitor as clinically indicated</li> </ul>                                                                                                                                                                                                                |
| <ul style="list-style-type: none"> <li>• Any grade 3 toxicity, if clinically significant and not manageable by supportive care</li> </ul> | <ul style="list-style-type: none"> <li>• <b>Step 1:</b> Interrupt pemigatinib up to 14 days, until the toxicity resolves to <math>\leq</math> grade 1</li> <li>• <b>Step 2:</b> Restart pemigatinib at the same dose. If assessed as treatment-related, restart pemigatinib at next lower dose; monitor as clinically indicated</li> </ul>                |
| <ul style="list-style-type: none"> <li>• Any recurrent grade 3 toxicity after 2 dose reductions</li> </ul>                                | <ul style="list-style-type: none"> <li>• Discontinue pemigatinib administration and follow-up per protocol</li> </ul>                                                                                                                                                                                                                                     |
| <ul style="list-style-type: none"> <li>• Any other grade 4 toxicity</li> </ul>                                                            | <ul style="list-style-type: none"> <li>• Discontinue pemigatinib administration and follow-up per protocol</li> </ul>                                                                                                                                                                                                                                     |

ULN = upper limit of normal.



**Table S3: Protocol deviations**

| <b>Deviation</b>                   | <b>Total (n=146)</b> |
|------------------------------------|----------------------|
| Adverse event                      | 3 (2)                |
| Entry criteria                     | 12 (8)               |
| Concomitant medications            | 7 (5)                |
| Noncompliance with study treatment | 0                    |
| Noncompliance with study procedure | 35 (24)              |
| Out of window assesement           | 67 (46)              |
| Missed assessment                  | 129 (88)             |
| Other                              | 24 (16)              |

**Table S4: Summary of therapies received immediately after discontinuing treatment in patients with available data**

| Poststudy treatment, n (%) | Total (N=35)                        |         |
|----------------------------|-------------------------------------|---------|
| Chemotherapy regimen       | FOLFIRI                             | 11 (31) |
|                            | Capecitabine                        | 2 (6)   |
|                            | Gemcitabine/taxol                   | 1 (3)   |
|                            | 5-FU/gemcitabine                    | 1 (3)   |
|                            | Irinotecan/leucovorin               | 1 (3)   |
|                            | Gemcitabine/cisplatin/capecitabine  | 1 (3)   |
|                            | Capecitabine/cisplatin              | 1 (3)   |
|                            | Epirubicin/cisplatin                | 1 (3)   |
|                            | Gemcitabine/cisplatin               | 1 (3)   |
|                            | Gemcitabine/oxaliplatin             | 1 (3)   |
|                            | Irinotecan/capecitabine             | 1 (3)   |
|                            | Capecitabine/oxaliplatin            | 1 (3)   |
|                            | Epirubicin/cisplatin/tegafur/uracil | 1 (3)   |
| Targeted therapy           | TAS-120                             | 3 (9)   |
|                            | Sulfatinib                          | 1 (3)   |
| Immunotherapy              | Nivolumab                           | 4 (11)  |
|                            | Pembrolizumab                       | 2 (6)   |
| Radiotherapy               | Y90 radioembolisation               | 1 (3)   |

**Table S5: Summary of therapies received immediately before study enrolment**

| Prior treatment, N (%)     |                                     | Total (N=146) |
|----------------------------|-------------------------------------|---------------|
| Chemotherapy regimen       | Gemcitabine/cisplatin               | 68 (47)       |
|                            | Gemcitabine/oxaliplatin             | 10 (7)        |
|                            | FOLFOX                              | 9 (6)         |
|                            | Gemcitabine                         | 8 (5)         |
|                            | Capecitabine                        | 6 (4)         |
|                            | FOLFIRI                             | 6 (4)         |
|                            | FOLFIRINOX                          | 6 (4)         |
|                            | Oxaliplatin/capecitabine            | 3 (2)         |
|                            | Gemcitabine/cisplatin/silmitasertib | 3 (2)         |
|                            | Gemcitabine/capecitabine            | 3 (2)         |
|                            | Gemcitabine/cisplatin/merestinib    | 2 (1)         |
|                            | 5-FU/oxaliplatin                    | 2 (1)         |
|                            | Gemcitabine/carboplatin             | 2 (1)         |
|                            | Gemcitabine/cisplatin/paclitaxel    | 1 (1)         |
|                            | FOLFIRABRAX                         | 1 (1)         |
|                            | 5-FU/irinotecan                     | 1 (1)         |
|                            | 5-FU/leucovorin                     | 1 (1)         |
|                            | Capecitabine/chemoradiation         | 1 (1)         |
|                            | Carboplatin/docetaxel               | 1 (1)         |
|                            | Capecitabine/MEK inhibitor          | 1 (1)         |
|                            | Cyclophosphamide                    | 1 (1)         |
|                            | Tegafur                             | 1 (1)         |
|                            | Gimeracil/oteracil/tegafur          | 1 (1)         |
| 5-FU/doxorubicin/mitomycin | 1 (1)                               |               |
| Capecitabine/cisplatin     | 1 (1)                               |               |
| Gemcitabine/paclitaxel     | 1 (1)                               |               |
| Targeted therapy           | Ponatinib                           | 1 (1)         |
|                            | Derazantinib                        | 1 (1)         |
|                            | Regorafenib                         | 1 (1)         |
| Immunotherapy              | Nivolumab                           | 1 (1)         |
|                            | Nivolumab/BMS-986179                | 1 (1)         |

**Table S6: FGFR2 fusions or rearrangements in cohort A**

| <b>FGFR2 Rearrangement or fusion, n (%)</b> | <b>Cohort A (n=107)</b> |
|---------------------------------------------|-------------------------|
| <i>FGFR2-BICC1</i>                          | 31 (29)                 |
| <i>FGFR2-N/A*</i>                           | 5 (5)                   |
| <i>FGFR2-KIAA1217</i>                       | 4 (4)                   |
| <i>FGFR2-AHCYL1</i>                         | 3 (3)                   |
| <i>FGFR2-SLMAP</i>                          | 2 (2)                   |
| <i>FGFR2-SHROOM3</i>                        | 2 (2)                   |
| <i>FGFR2-MACF1</i>                          | 2 (2)                   |
| <i>FGFR2-NRAP</i>                           | 2 (2)                   |
| <i>FGFR2-NOLA</i>                           | 2 (2)                   |
| <i>FGFR2-PAWR</i>                           | 2 (2)                   |
| <i>FGFR2-ARHGAP24</i>                       | 2 (2)                   |
| <i>FGFR2-TACC1</i>                          | 2 (2)                   |
| <i>FGFR2-TRIM8</i>                          | 2 (2)                   |
| <i>FGFR2-AFF4</i>                           | 2 (2)                   |
| <i>FGFR2-CCDC6</i>                          | 2 (2)                   |
| <i>FGFR2-NEDD4L</i>                         | 1 (1)                   |
| <i>FGFR2-SOGA1</i>                          | 1 (1)                   |
| <i>FGFR2-POC1B</i>                          | 1 (1)                   |
| <i>FGFR2-ACLY</i>                           | 1 (1)                   |
| <i>FGFR2-FILIP1</i>                         | 1 (1)                   |
| <i>FGFR2-SPICE1</i>                         | 1 (1)                   |
| <i>FGFR2-TTC28</i>                          | 1 (1)                   |
| <i>FGFR2-CCDC158</i>                        | 1 (1)                   |
| <i>FGFR2-COL16A1</i>                        | 1 (1)                   |
| <i>FGFR2-GOPC</i>                           | 1 (1)                   |
| <i>FGFR2-RABGAP1L and FGFR2-LAMC1</i>       | 1 (1)                   |
| <i>FGFR2-GAB2</i>                           | 1 (1)                   |
| <i>FGFR2-RASSF4</i>                         | 1 (1)                   |
| <i>FGFR2-STRN4</i>                          | 1 (1)                   |
| <i>FGFR2-ATF2</i>                           | 1 (1)                   |
| <i>FGFR2-VCL</i>                            | 1 (1)                   |
| <i>FGFR2-MCU</i>                            | 1 (1)                   |
| <i>FGFR2-RPAP3</i>                          | 1 (1)                   |
| <i>FGFR2-TXLNB</i>                          | 1 (1)                   |
| <i>FGFR2-BICD1</i>                          | 1 (1)                   |
| <i>FGFR2-WAC</i>                            | 1 (1)                   |
| <i>FGFR2-NRBF2</i>                          | 1 (1)                   |
| <i>FGFR2-KCTD1</i>                          | 1 (1)                   |
| <i>FGFR2-MATR3</i>                          | 1 (1)                   |
| <i>FGFR2-SF11</i>                           | 1 (1)                   |
| <i>FGFR2-DNAJC12</i>                        | 1 (1)                   |
| <i>FGFR2-WDHD1</i>                          | 1 (1)                   |
| <i>FGFR2-PXN</i>                            | 1 (1)                   |
| <i>FGFR2-USH2A</i>                          | 1 (1)                   |
| <i>FGFR2-CTNNA3</i>                         | 1 (1)                   |
| <i>FGFR2-EEA1</i>                           | 1 (1)                   |
| <i>FGFR2-INSC</i>                           | 1 (1)                   |
| <i>FGFR2-CEP128</i>                         | 1 (1)                   |
| <i>FGFR2-KIAA1598</i>                       | 1 (1)                   |

|                        |       |
|------------------------|-------|
| <i>FGFR2-EIF4ENIF1</i> | 1 (1) |
| <i>FGFR2-ATAD2</i>     | 1 (1) |
| <i>FGFR2-CCDC170</i>   | 1 (1) |
| <i>FGFR2-TFEC</i>      | 1 (1) |
| <i>FGFR2-ARHGAP22</i>  | 1 (1) |
| <i>FGFR2-DBP</i>       | 1 (1) |
| <i>FGFR2-PAH</i>       | 1 (1) |
| <i>FGFR2-ZMYM4</i>     | 1 (1) |

\*Intron 17 rearrangement.

**Table S7: All Causality AEs Across Cohorts (N=146)\***

| <b>AEs, † n (%)</b>                  | <b>Grade 1–2</b> | <b>Grade 3</b> | <b>Grade 4</b> |
|--------------------------------------|------------------|----------------|----------------|
| Hyperphosphataemia‡                  | 88 (60)          | 0              | 0              |
| Alopecia                             | 72 (49)          | 0              | 0              |
| Diarrhoea                            | 64 (44)          | 4 (3)          | 0              |
| Fatigue                              | 55 (38)          | 7 (5)          | 0              |
| Dysgeusia                            | 59 (40)          | 0              | 0              |
| Nausea                               | 55 (38)          | 3 (2)          | 0              |
| Constipation                         | 50 (34)          | 1 (1)          | 0              |
| Stomatitis                           | 43 (29)          | 8 (5)          | 0              |
| Dry mouth                            | 49 (34)          | 0              | 0              |
| Decreased appetite                   | 46 (32)          | 2 (1)          | 0              |
| Vomiting                             | 38 (26)          | 2 (1)          | 0              |
| Dry eye                              | 36 (25)          | 1 (1)          | 0              |
| Arthralgia                           | 27 (18)          | 8 (5)          | 1 (1)          |
| Abdominal pain                       | 26 (18)          | 7 (5)          | 0              |
| Hypophosphataemia§                   | 15 (10)          | 18 (12)        | 0              |
| Back pain                            | 25 (17)          | 4 (3)          | 0              |
| Dry skin                             | 28 (19)          | 1 (1)          | 0              |
| Pain in extremity                    | 25 (17)          | 3 (2)          | 0              |
| Oedema peripheral                    | 25 (17)          | 1 (1)          | 0              |
| Weight decreased                     | 21 (14)          | 3 (2)          | 0              |
| Headache                             | 23 (16)          | 0              | 0              |
| Urinary tract infection              | 19 (13)          | 4 (3)          | 0              |
| Dehydration                          | 17 (12)          | 5 (3)          | 0              |
| Hypercalcaemia                       | 19 (13)          | 3 (2)          | 0              |
| PPE                                  | 16 (11)          | 6 (4)          | 0              |
| Anaemia                              | 16 (11)          | 5 (3)          | 0              |
| Epistaxis                            | 20 (14)          | 0              | 0              |
| Pyrexia                              | 19 (13)          | 1 (1)          | 0              |
| Asthenia                             | 17 (12)          | 2 (1)          | 0              |
| Dizziness                            | 18 (12)          | 1 (1)          | 0              |
| Myalgia                              | 16 (11)          | 2 (1)          | 0              |
| Hyponatraemia                        | 8 (5)            | 7 (5)          | 1 (1)          |
| Blood creatinine increased           | 14 (10)          | 2 (1)          | 0              |
| Gastroesophageal reflux disease      | 15 (10)          | 1 (1)          | 0              |
| Musculoskeletal pain                 | 15 (10)          | 0              | 0              |
| Blood alkaline phosphatase increased | 9 (6)            | 5 (3)          | 0              |
| Onychomadesis                        | 14 (10)          | 0              | 0              |
| Dyspnoea                             | 13 (9)           | 1 (1)          | 0              |
| Nail discolouration                  | 13 (9)           | 1 (1)          | 0              |
| Abdominal pain upper                 | 11 (8)           | 2 (1)          | 0              |
| Hypertension                         | 8 (5)            | 4 (3)          | 0              |

|                                                 |       |       |       |
|-------------------------------------------------|-------|-------|-------|
| Acute kidney injury                             | 8 (5) | 3 (2) | 0     |
| Hypotension                                     | 4 (3) | 6 (4) | 0     |
| Aspartate aminotransferase increased            | 6 (4) | 4 (3) | 0     |
| Alanine aminotransferase increased              | 7 (5) | 3 (2) | 0     |
| Hyperbilirubinaemia                             | 7 (5) | 3 (2) | 0     |
| Hyperuricaemia                                  | 8 (5) | 0     | 2 (1) |
| Paronychia                                      | 9 (6) | 1 (1) | 0     |
| Chills                                          | 8 (5) | 1 (1) | 0     |
| Onychoclasia                                    | 8 (5) | 1 (1) | 0     |
| Blood bilirubin increased                       | 6 (4) | 2 (1) | 0     |
| Erythema                                        | 7 (5) | 1 (1) | 0     |
| Cholangitis                                     | 3 (2) | 3 (2) | 1 (1) |
| Ascites                                         | 4 (3) | 3 (2) | 0     |
| Flank pain                                      | 5 (3) | 2 (1) | 0     |
| Dysphagia                                       | 6 (4) | 1 (1) | 0     |
| Lymphocyte count decreased                      | 6 (4) | 1 (1) | 0     |
| Skin exfoliation                                | 6 (4) | 1 (1) | 0     |
| Hypokalaemia                                    | 5 (3) | 2 (1) | 0     |
| Pleural effusion                                | 1 (1) | 3 (2) | 1 (1) |
| Nail disorder                                   | 4 (3) | 1 (1) | 0     |
| Pneumonia                                       | 2 (1) | 2 (1) | 0     |
| Keratitis                                       | 3 (2) | 1 (1) | 0     |
| Transaminases increased                         | 3 (2) | 1 (1) | 0     |
| Vision blurred                                  | 3 (2) | 1 (1) | 0     |
| Failure to thrive                               | 0     | 1 (1) | 2 (1) |
| Small intestinal obstruction                    | 0     | 3 (2) | 0     |
| Cholangitis infective                           | 1 (1) | 2 (1) | 0     |
| Activated partial thromboplastin time prolonged | 2 (1) | 1 (1) | 0     |
| Chronic kidney disease                          | 2 (1) | 1 (1) | 0     |
| Hypothyroidism                                  | 2 (1) | 1 (1) | 0     |
| Pulmonary embolism                              | 2 (1) | 1 (1) | 0     |
| Rash pruritic                                   | 2 (1) | 1 (1) | 0     |
| Skin infection                                  | 2 (1) | 1 (1) | 0     |
| Bacteraemia                                     | 0     | 2 (1) | 0     |
| Bile duct obstruction                           | 0     | 1 (1) | 1 (1) |
| Gastrointestinal haemorrhage                    | 0     | 2 (1) | 0     |
| Intestinal obstruction                          | 0     | 2 (1) | 0     |
| Pneumonia aspiration                            | 0     | 0     | 2 (1) |
| Sepsis                                          | 0     | 1 (1) | 1 (1) |
| Syncope                                         | 0     | 2 (1) | 0     |
| Colitis                                         | 1 (1) | 1 (1) | 0     |
| Confusional state                               | 1 (1) | 1 (1) | 0     |
| Device occlusion                                | 1 (1) | 1 (1) | 0     |

|                                              |       |       |       |
|----------------------------------------------|-------|-------|-------|
| Hepatic pain                                 | 1 (1) | 1 (1) | 0     |
| Hyperkalaemia                                | 1 (1) | 1 (1) | 0     |
| Ileus                                        | 1 (1) | 1 (1) | 0     |
| Lung infection                               | 1 (1) | 1 (1) | 0     |
| Proteinuria                                  | 1 (1) | 1 (1) | 0     |
| Psoriasis                                    | 1 (1) | 1 (1) | 0     |
| Rectal haemorrhage                           | 1 (1) | 1 (1) | 0     |
| Retinal detachment                           | 1 (1) | 1 (1) | 0     |
| Acinetobacter bacteraemia                    | 0     | 1 (1) | 0     |
| Anaphylactic reaction                        | 0     | 0     | 1 (1) |
| Aortic valve disease                         | 0     | 1 (1) | 0     |
| Biliary tract infection                      | 0     | 1 (1) | 0     |
| Biloma                                       | 0     | 1 (1) | 0     |
| Cancer pain                                  | 0     | 1 (1) | 0     |
| Catheter site infection                      | 0     | 1 (1) | 0     |
| Clostridium difficile infection              | 0     | 1 (1) | 0     |
| Coma                                         | 0     | 0     | 1 (1) |
| Complication associated with device          | 0     | 1 (1) | 0     |
| Compression fracture                         | 0     | 1 (1) | 0     |
| Device leakage                               | 0     | 1 (1) | 0     |
| Device related infection                     | 0     | 1 (1) | 0     |
| Embolic cerebral infarction                  | 0     | 1 (1) | 0     |
| Enterobacter bacteraemia                     | 0     | 1 (1) | 0     |
| Foot fracture                                | 0     | 1 (1) | 0     |
| Gallbladder disorder                         | 0     | 1 (1) | 0     |
| Gamma-glutamyltransferase increased          | 0     | 1 (1) | 0     |
| Haematemesis                                 | 0     | 1 (1) | 0     |
| Hypercalcaemia of malignancy                 | 0     | 1 (1) | 0     |
| Inappropriate antidiuretic hormone secretion | 0     | 0     | 1 (1) |
| Kidney infection                             | 0     | 1 (1) | 0     |
| Klebsiella infection                         | 0     | 1 (1) | 0     |
| Malignant neoplasm progression               | 0     | 1 (1) | 0     |
| Malnutrition                                 | 0     | 1 (1) | 0     |
| Melaena                                      | 0     | 1 (1) | 0     |
| Obstruction gastric                          | 0     | 1 (1) | 0     |
| Oesophageal varices haemorrhage              | 0     | 1 (1) | 0     |
| Paraplegia                                   | 0     | 1 (1) | 0     |
| Pneumonitis                                  | 0     | 1 (1) | 0     |
| Postoperative wound infection                | 0     | 1 (1) | 0     |
| Prostate cancer                              | 0     | 1 (1) | 0     |
| Pseudomonal bacteraemia                      | 0     | 1 (1) | 0     |
| Retinal artery occlusion                     | 0     | 1 (1) | 0     |
| Skin toxicity                                | 0     | 1 (1) | 0     |



|                                    |   |       |   |
|------------------------------------|---|-------|---|
| Thrombosis                         | 0 | 1 (1) | 0 |
| Upper gastrointestinal haemorrhage | 0 | 1 (1) | 0 |
| Varices oesophageal                | 0 | 1 (1) | 0 |

AE=adverse event; MedDRA=Medical Dictionary for Regulatory Activities; PPE=palmar-plantar erythrodysesthesia. \*Table includes all causality AEs occurring in  $\geq 10\%$  of patients (there were no grade 5 AEs reported in this study). †Table columns are ordered relative to the descending frequency of any grade all-causality AEs. ‡The following MedDRA Preferred Terms related to hyperphosphataemia were combined: Blood Phosphorus Increased; and Hyperphosphataemia. §The following MedDRA Preferred Terms related to hypophosphataemia were combined: Blood Phosphorus Decreased; and Hypophosphataemia. Data includes one patient who did not have confirmed *FGF/FGFR* status by central laboratory and was not assigned to any cohort.

**Table S8: MedDRA preferred terms combined in definitions of clinically notable AEs**

| <b>Clinically notable AE</b> | <b>MedDRA preferred terms</b>                                                                                                                                                                                          |
|------------------------------|------------------------------------------------------------------------------------------------------------------------------------------------------------------------------------------------------------------------|
| Hyperphosphataemia           | Blood Phosphorus Increased; Hyperphosphataemia                                                                                                                                                                         |
| Hypophosphataemia            | Blood Phosphorus Decreased; Hypophosphataemia                                                                                                                                                                          |
| Nail toxicity                | Nail toxicity; Nail disorder; Nail discolouration; Nail discomfort; Nail dystrophy; Nail hypertrophy; Nail ridging; Nail infection; Onychalgia; Onychoclasia; Onycholysis; Onychomadesis; Onychomycosis and Paronychia |
| Serous retinal detachment    | Retinal detachment; Detachment of retinal pigmented epithelium; Retinal thickening; Subretinal fluid; Chorioretinal folds; Chorioretinal scar; Maculopathy                                                             |

AE=adverse event; MedDRA=Medical Dictionary for Regulatory Activities.

## Supplemental figures

**Figure S1: Duration of response – cohort A (assessed by independent reviewer)**

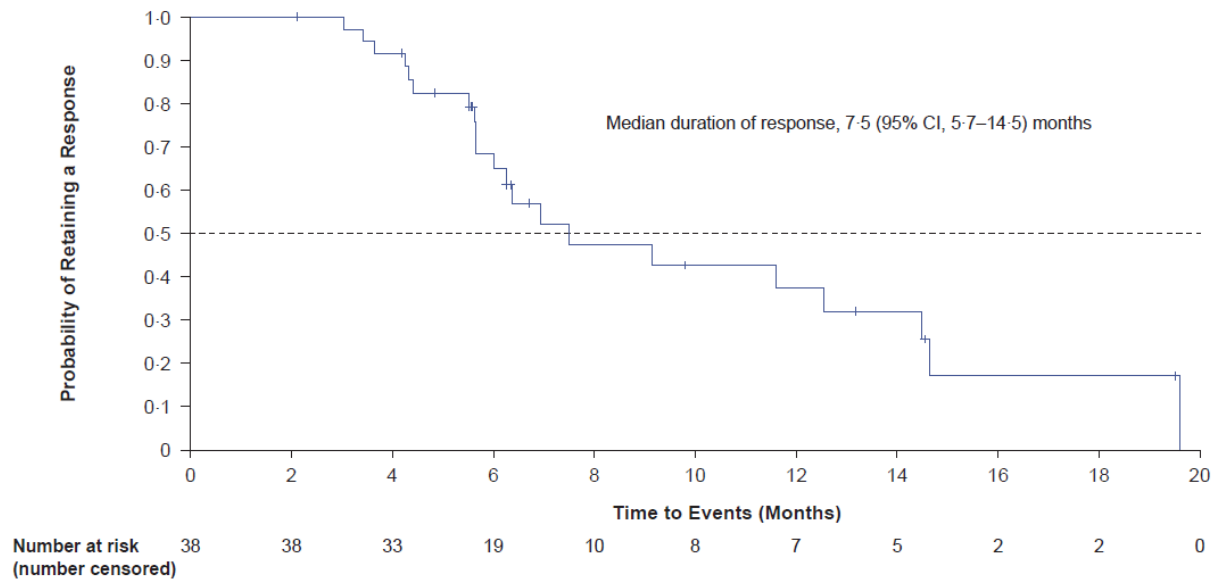

CI=confidence interval.

**Figure S2: Subgroup analysis of the proportion of patients with an objective response in cohort A, assessed by independent reviewer**

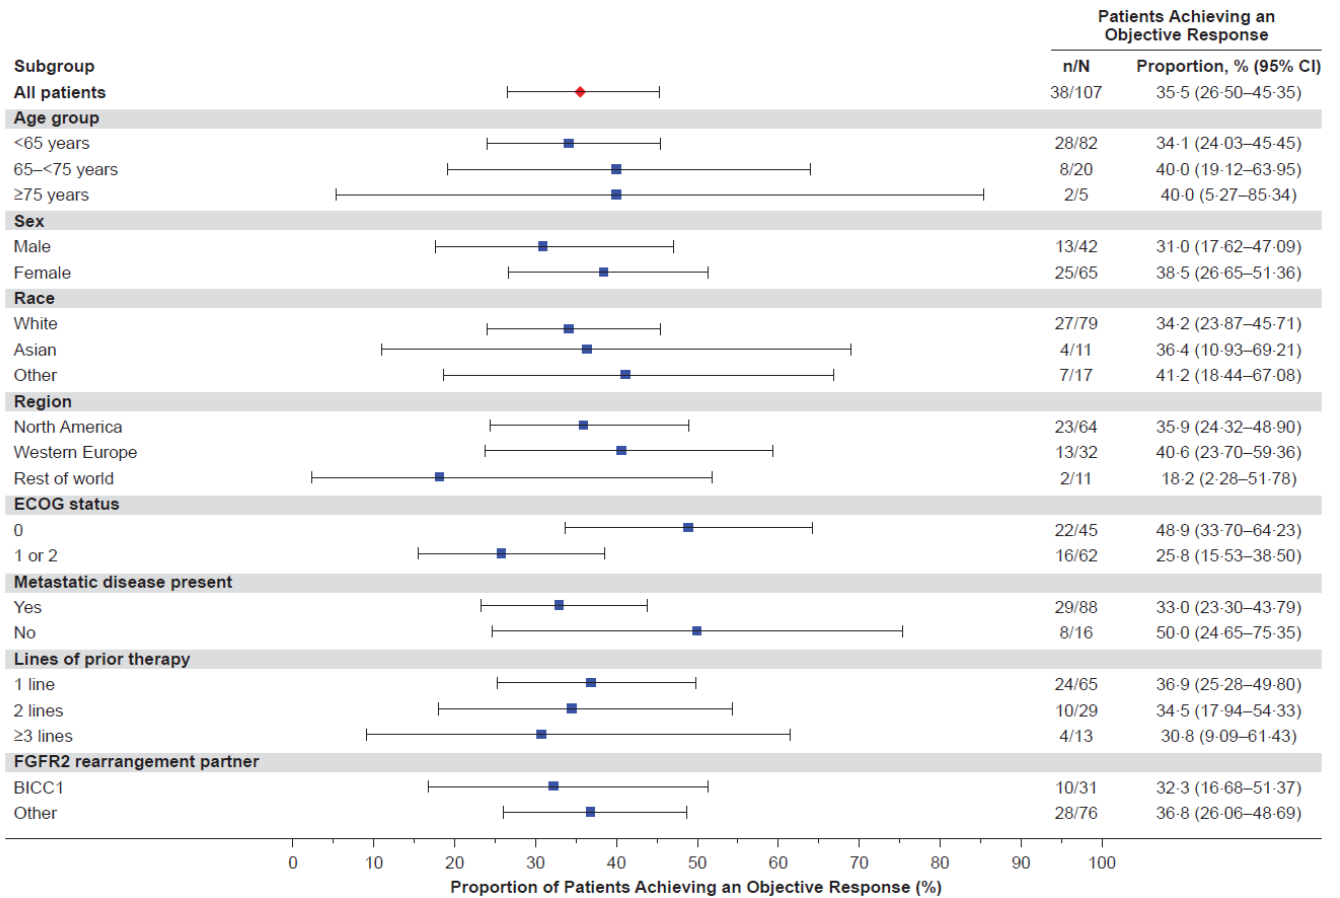

ECOG=Eastern Cooperative Oncology Group. FGFR= fibroblast growth factor receptor.

**Figure S3: Subgroup analysis of progression-free survival in cohort A**

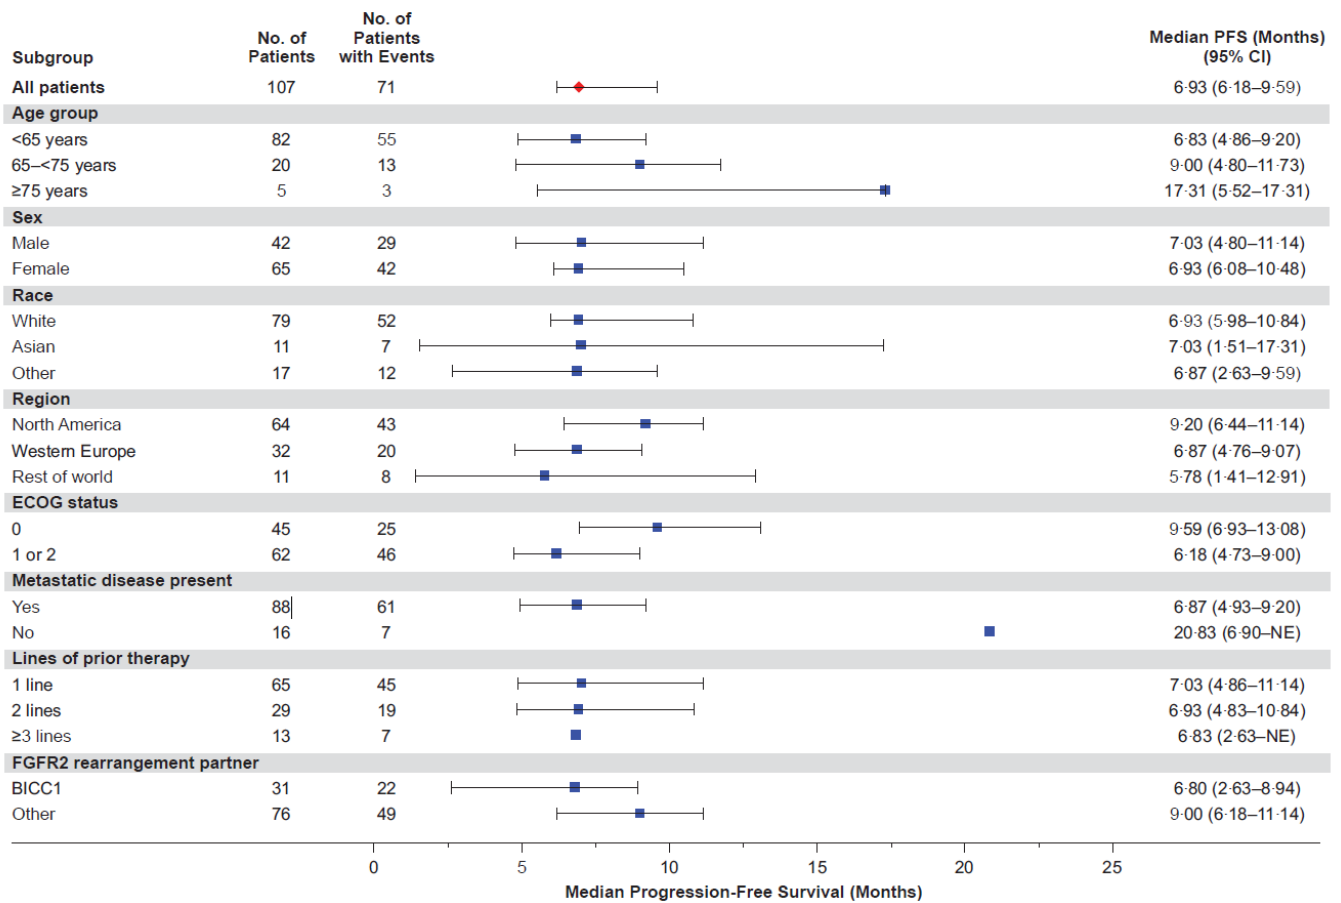

CI=confidence interval; ECOG=Eastern Cooperative Oncology Group; NE=not evaluable.

**Figure S4: Best percentage change in target lesion size in individual patients enrolled in cohort B (panel A) and cohort C (panel B)**

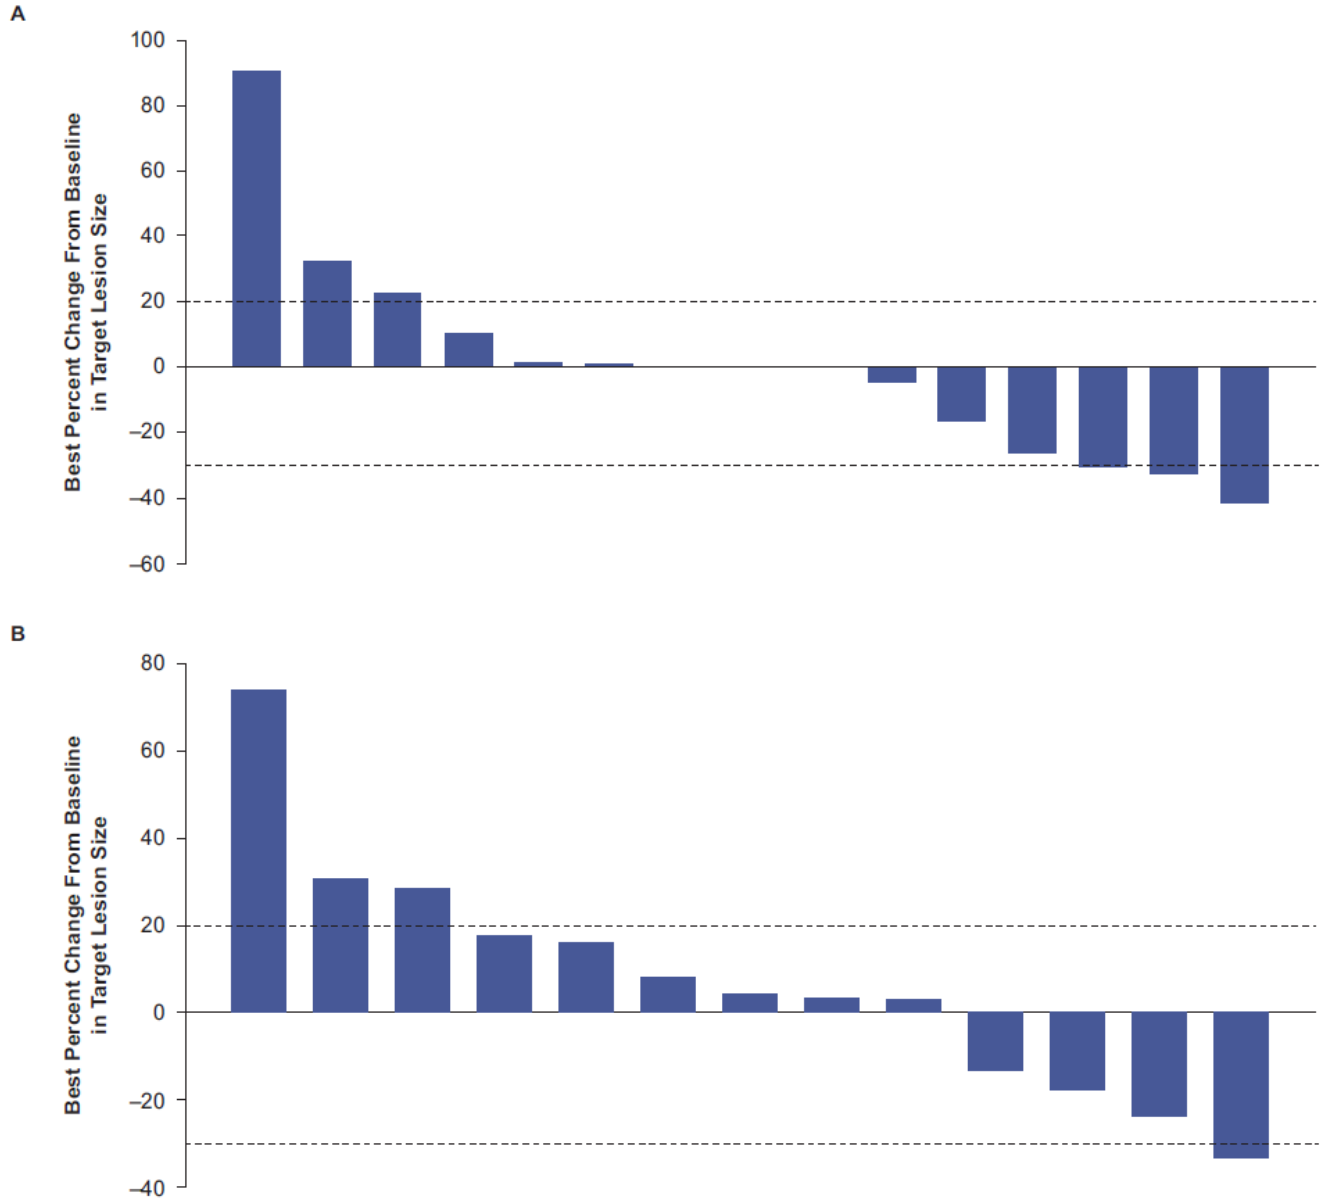

**Figure S5: Model predicted versus observed average serum phosphate concentration change from baseline at C1D8 and C1D15 following once-daily dosing of pemigatinib 13.5 mg\***

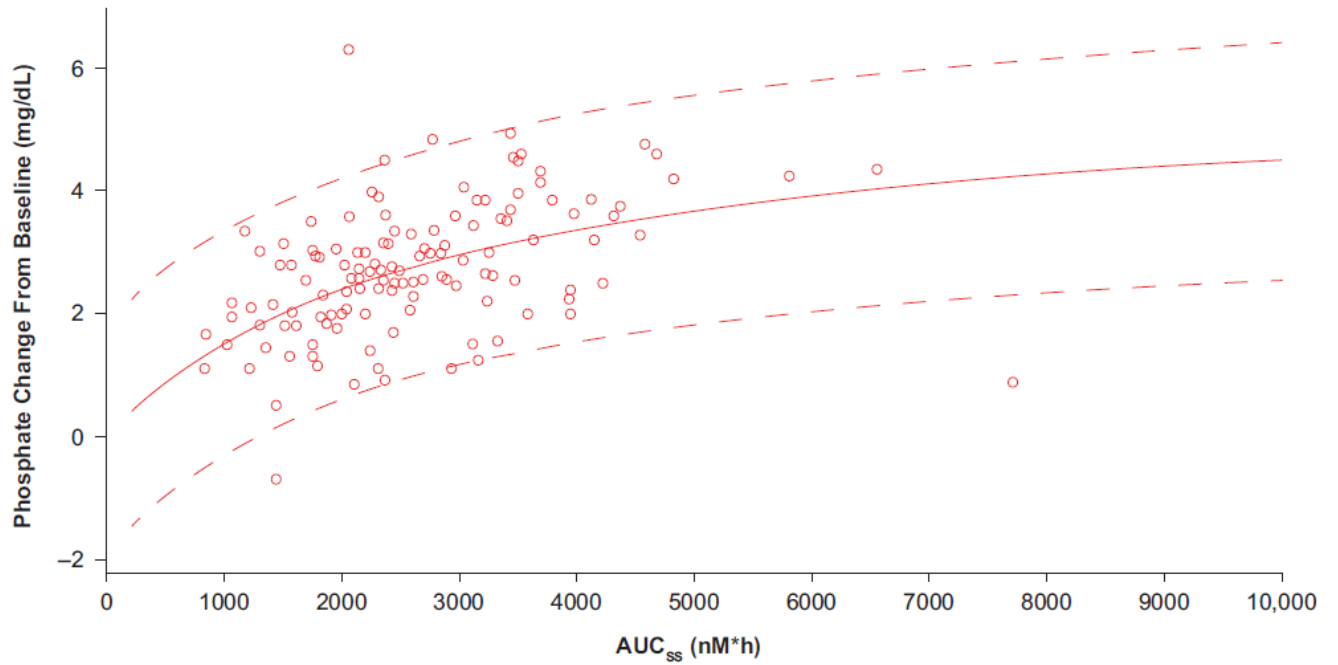

\*Observed data (red circles) correspond to individual patients enrolled in the FIGHT-202 trial. The area under the curves were estimated using population PK model based on pooled PK data from FIGHT-202 as well as FIGHT-101 and FIGHT-102; simulated mean (solid red line) and simulated 5% and 95% confidence intervals were derived from a population PK/PD model.

C=cycle; D=day; PD=pharmacodynamic; PK=pharmacokinetic.

**Figure S6: Probability of response (the proportion of patients with an objective response) versus maximum phosphate concentration change from baseline at C1D8 and C1D15 following once-daily dosing of 13.5 mg pemigatinib in patients enrolled in cohort A\***

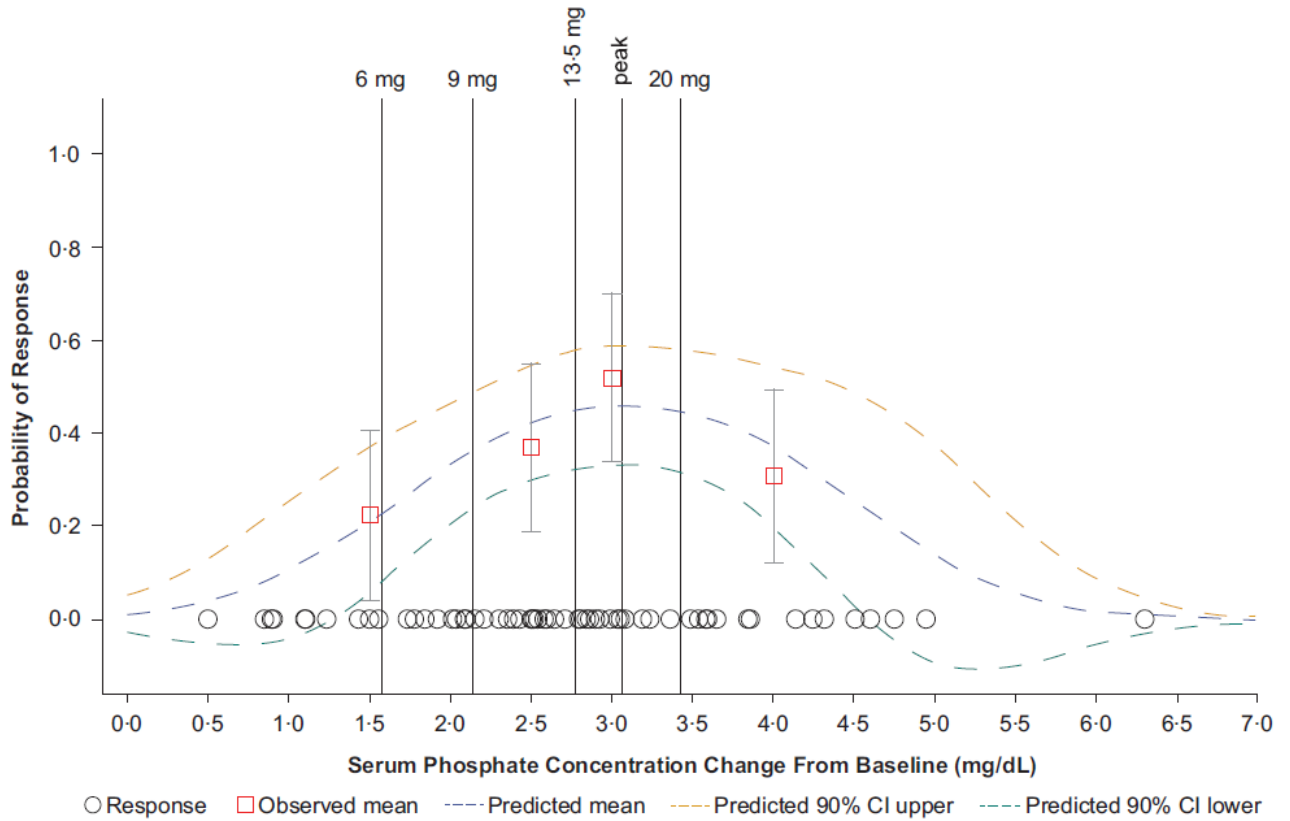

\*The change in serum phosphate concentration from baseline at doses of 6 mg, 9 mg, 13.5 mg, and 20 mg were predicted from the pemigatinib exposure and phosphate response model. The pemigatinib exposure at each dose were simulated using population PK model. Red squares represent observed first (0.5–2.1 mg/dL), second (2.1–2.74 mg/dl), third (2.74–3.5 mg/dL), and fourth (3.5–6.3 mg/dL) quartiles of the change in serum phosphate concentration from baseline. C=cycle; D=day; PK pharmacokinetic.



**Figure S7: Line graph of mean ( $\pm$  SE) change from baseline for (A) phosphate, (B) 1,25-dihydroxyvitamin D3, and (C) parathyroid hormone over time (safety population): all cohorts**

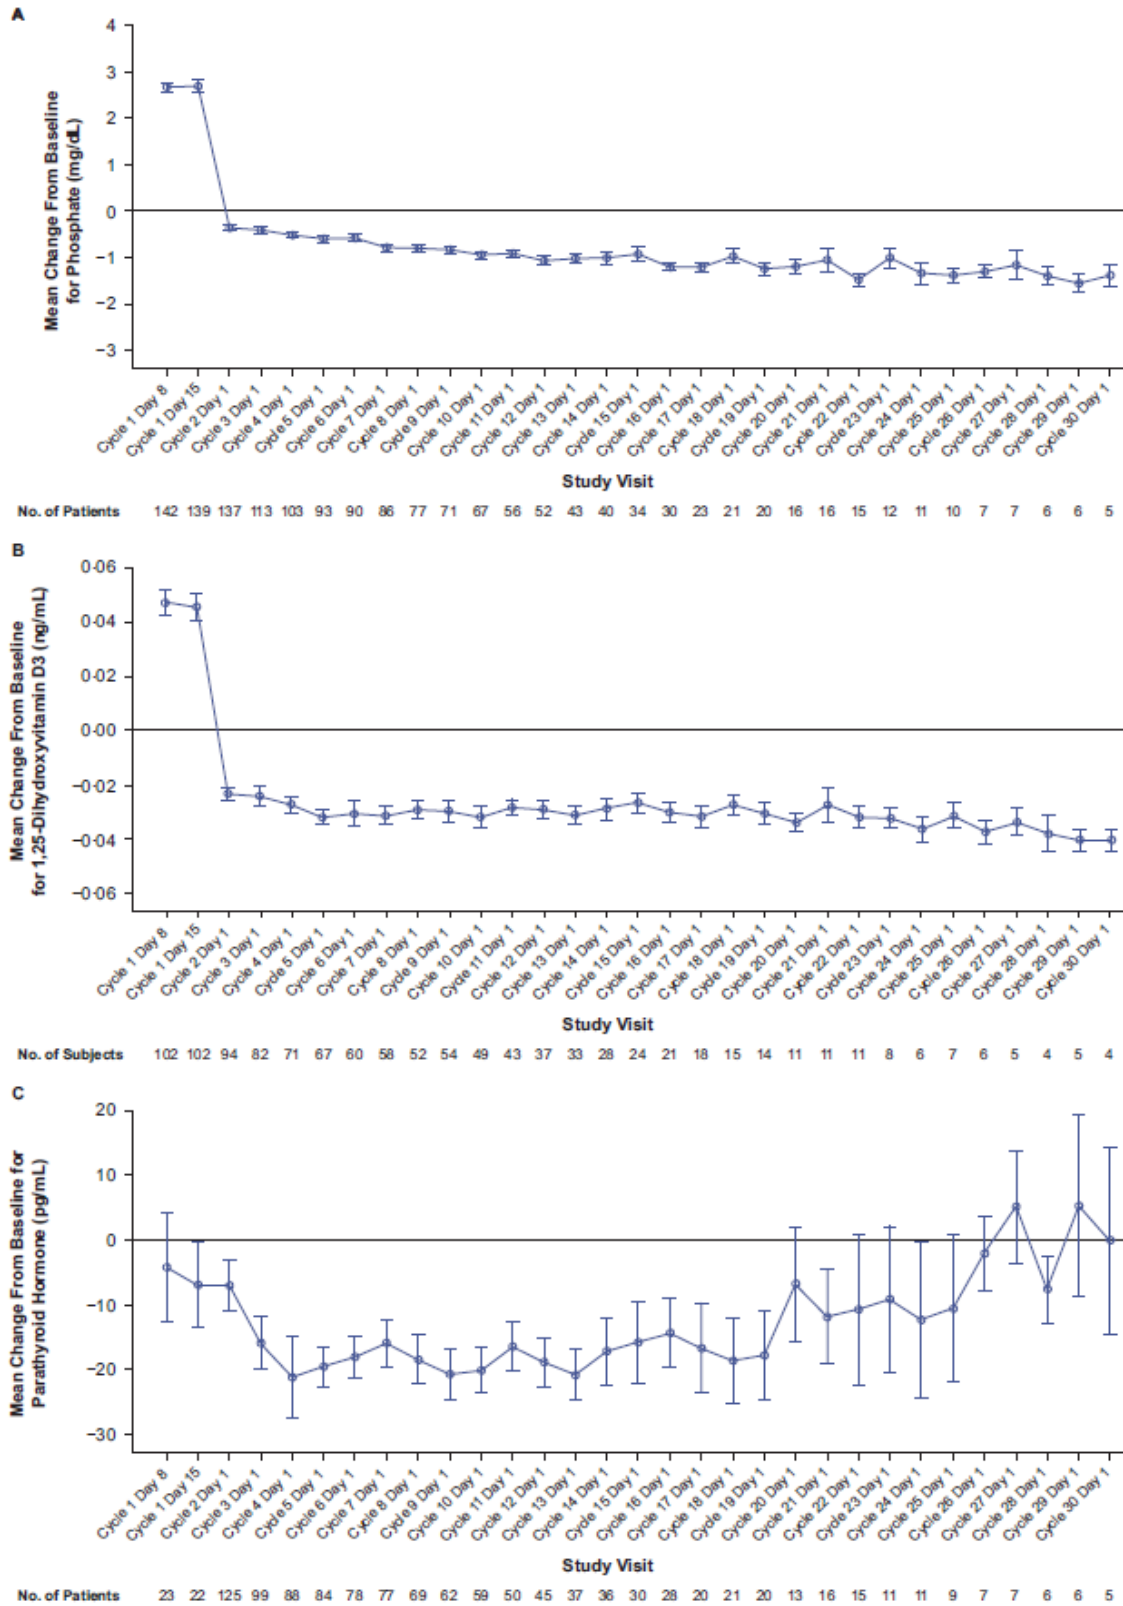

SE=standard error.

## References

1. Saleh M, Gutierrez M, Subbiah V, et al. Abstract A098: preliminary results from a phase 1/2 study of INCB054828, a highly selective fibroblast growth factor receptor (FGFR) inhibitor, in patients (pts) with advanced malignancies. *Mol Cancer Ther* 2018; **17**(1 Suppl): A098.
2. Kuboki Y, Furukawa M, Takahashi Y, et al. Preliminary results from FIGHT-102: a phase 1 study of pemigatinib in Japanese patients with advanced malignancies. Presented at: Japanese Society of Medical Oncology 17th Scientific Meeting, July 18–20, 2019; Kyoto, Japan.

## **FIGHT-202 Study Protocol**

- Please see overleaf.

## Clinical Study Protocol

---

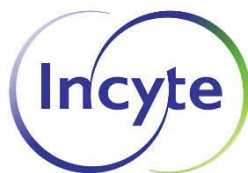

### INCB 54828-202

## A Phase 2, Open-Label, Single-Arm, Multicenter Study to Evaluate the Efficacy and Safety of INCB054828 in Subjects With Advanced/Metastatic or Surgically Unresectable Cholangiocarcinoma Including FGFR2 Translocations Who Failed Previous Therapy

|                                       |                                                                      |
|---------------------------------------|----------------------------------------------------------------------|
| <b>Product:</b>                       | INCB054828                                                           |
| <b>IND Number:</b>                    | 124,358                                                              |
| <b>EudraCT Number:</b>                | 2016-002422-36                                                       |
| <b>Phase of Study:</b>                | 2                                                                    |
| <b>Sponsor:</b>                       | Incyte Corporation<br>1801 Augustine Cut-Off<br>Wilmington, DE 19803 |
| <b>Original Protocol (Version 0):</b> | 02 JUN 2016                                                          |
| <b>Amendment (Version) 1:</b>         | 14 SEP 2016                                                          |
| <b>Amendment (Version) 2:</b>         | 05 DEC 2016                                                          |
| <b>Amendment (Version) 3:</b>         | 18 JAN 2017                                                          |
| <b>Amendment (Version) 4:</b>         | 21 MAR 2017                                                          |
| <b>Amendment (Version) 5:</b>         | 03 OCT 2017                                                          |
| <b>Amendment (Version) 6:</b>         | 15 FEB 2018                                                          |

This study will be performed in accordance with ethical principles that have their origin in the Declaration of Helsinki and conducted in adherence to the study Protocol, Good Clinical Practices as defined in Title 21 of the US Code of Federal Regulations Parts 11, 50, 54, 56, and 312, as well as ICH GCP consolidated guidelines (E6) and applicable regulatory requirements.

The information in this document is confidential. No part of this information may be duplicated, referenced, or transmitted in any form or by any means (electronic, mechanical, photocopy, recording, or otherwise) without the prior written consent of Incyte Corporation.

## INVESTIGATOR'S AGREEMENT

I have read the INCB 54828-202 Protocol Amendment 6 (Version 6 dated 15 FEB 2018) and agree to conduct the study as outlined. I agree to maintain the confidentiality of all information received or developed in connection with this Protocol.

---

(Printed Name of Investigator)

---

(Signature of Investigator)

---

(Date)

## SYNOPSIS

|                                                                                                                                                                                                                                                                                                                                                                                                                                                                                                                                                                                                                                                                                                                                                                                           |                       |
|-------------------------------------------------------------------------------------------------------------------------------------------------------------------------------------------------------------------------------------------------------------------------------------------------------------------------------------------------------------------------------------------------------------------------------------------------------------------------------------------------------------------------------------------------------------------------------------------------------------------------------------------------------------------------------------------------------------------------------------------------------------------------------------------|-----------------------|
| <b>Name of Investigational Product:</b> INCB054828                                                                                                                                                                                                                                                                                                                                                                                                                                                                                                                                                                                                                                                                                                                                        |                       |
| <b>Title of Study:</b> A Phase 2, Open-Label, Single-Arm, Multicenter Study to Evaluate the Efficacy and Safety of INCB054828 in Subjects With Advanced/Metastatic or Surgically Unresectable Cholangiocarcinoma Including FGFR2 Translocations Who Failed Previous Therapy                                                                                                                                                                                                                                                                                                                                                                                                                                                                                                               |                       |
| <b>Protocol Number:</b> INCB 54828-202                                                                                                                                                                                                                                                                                                                                                                                                                                                                                                                                                                                                                                                                                                                                                    | <b>Study Phase:</b> 2 |
| <b>Indication:</b> Advanced/metastatic or surgically unresectable cholangiocarcinoma                                                                                                                                                                                                                                                                                                                                                                                                                                                                                                                                                                                                                                                                                                      |                       |
| <b>Primary Objective:</b><br>The primary objective of this study is to evaluate the efficacy of INCB054828 in subjects with advanced/metastatic or surgically unresectable cholangiocarcinoma with fibroblast growth factor receptor (FGFR) 2 translocation who have failed at least 1 previous treatment.                                                                                                                                                                                                                                                                                                                                                                                                                                                                                |                       |
| <b>Secondary Objectives:</b> <ul style="list-style-type: none"><li>• To evaluate the efficacy of INCB054828 in subjects with advanced/metastatic or surgically unresectable cholangiocarcinoma with different molecular subgroups.</li><li>• To evaluate the safety of INCB054828 in subjects with advanced/metastatic or surgically unresectable cholangiocarcinoma.</li><li>• To identify and evaluate covariates that may influence the pharmacokinetics of INCB054828 in this subject population through population pharmacokinetic analysis. Additionally, exposure-response analyses for key efficacy and safety parameters will also be considered if sufficient data are available.</li></ul>  |                       |
| <b>Primary Endpoint:</b><br>The primary endpoint of this study is to determine the objective response rate (ORR) in subjects with FGFR2 translocations based on the central genomics laboratory results. Objective response rate is defined as the proportion of subjects who achieved a complete response (CR; disappearance of all target lesions) or a partial response (PR; $\geq 30\%$ decrease in the sum of the longest diameters of target lesions) based on RECIST version 1.1. Clinical response will be determined by an independent radiological review committee.                                                                                                                                                                                                            |                       |
| <b>Secondary Endpoints:</b> <ul style="list-style-type: none"><li>• ORR in subjects with fibroblast growth factor (FGF)/FGFR alterations other than FGFR2 translocations (Cohort B).</li><li>• ORR in all subjects with FGF/FGFR alterations (Cohorts A and B).</li><li>• ORR in subjects negative for FGF/FGFR alterations (Cohort C [US only]).</li><li>• Progression-free survival (PFS = first dose to progressive disease [PD] or death; all cohorts).</li><li>• Duration of response (DOR = time from the date of CR or PR until PD; all cohorts).</li><li>• Disease control rate (DCR = CR + PR + stable disease; all cohorts).</li><li>• Overall survival (OS = first dose to death of any cause; all cohorts).</li></ul>                                                         |                       |

- Safety and tolerability will be assessed by evaluating the frequency, duration, and severity of adverse events; through review of findings of physical examinations, changes in vital signs, and electrocardiograms; and through clinical laboratory blood and urine sample evaluations (all cohorts).
- Population pharmacokinetics (all cohorts).

### Overall Study Design:

This is an open-label, monotherapy study of INCB054828 in subjects with advanced/metastatic or surgically unresectable cholangiocarcinoma with FGFR2 translocations, with other FGF/FGFR alterations, or who are negative for FGF/FGFR alterations. The study will enroll approximately 100 subjects into Cohort A (FGFR2 translocations), 20 subjects into Cohort B (other FGF/FGFR alterations), and 20 subjects into Cohort C (US only; negative for FGF/FGFR alterations). Subjects will receive a once daily (QD) dose of INCB054828 at 13.5 mg on a 2-week-on therapy and 1-week-off therapy schedule.

Subject eligibility can be based on local genomic testing results, if available. Confirmatory testing through the central genomics laboratory will be performed on all subjects.

Genomic testing results will allow subjects to be assigned to a cohort:

- Cohort A: FGFR2 translocations with a documented fusion partner in central laboratory report
- Cohort B: other FGF/FGFR alterations
- Cohort C (US only): negative for FGF/FGFR alterations

Subjects enrolled based on a local sequencing report will be assigned to a cohort based on the local results. However, final cohort assignment for statistical analysis of primary and secondary endpoints will be done based on the central genomics testing results.

Treatment will start on Day 1. Subjects will undergo regular safety assessments during treatment as well as regular efficacy assessments. Subjects will be allowed to continue administration in 21-day cycles until documented disease progression or unacceptable toxicity is reported.

### Study Population:

Subjects with advanced/metastatic or surgically unresectable cholangiocarcinoma with FGFR2 translocations, with other FGF/FGFR alterations, or who are negative for any FGF/FGFR alterations, who failed at least 1 previous treatment.

### Key Inclusion Criteria:

- Men and women, aged 18 or older.
- Histologically or cytologically confirmed advanced/metastatic or surgically unresectable cholangiocarcinoma. Subjects will be assigned to one of 3 cohorts:
  - Cohort A: FGFR2 translocations with a documented fusion partner in central laboratory report
  - Cohort B: other FGF/FGFR alterations
  - Cohort C (US only): negative for FGF/FGFR alterations
- Radiographically measurable disease per RECIST v1.1.
- Documentation of FGF/FGFR gene alteration status.

- Documented disease progression after at least 1 line of prior systemic therapy.
- ECOG performance status of 0 to 2.
- Life expectancy  $\geq$  12 weeks.

**Key Exclusion Criteria:**

- Prior receipt of a selective FGFR inhibitor.
- History of and/or current evidence of ectopic mineralization/calcification, including but not limited to soft tissue, kidneys, intestine, myocardia, or lung, excepting calcified lymph nodes and asymptomatic arterial or cartilage/tendon calcifications.
- Current evidence of clinically significant corneal or retinal disorder confirmed by ophthalmologic examination.
- Use of any potent CYP3A4 inhibitors or inducers within 14 days or 5 half-lives, whichever is shorter, before the first dose of study drug. Topical ketoconazole will be allowed.

**INCB054828, Dosage, and Mode of Administration:**

INCB054828 will be self-administered as a QD oral treatment on a 2-weeks-on therapy and 1-week-off therapy schedule. Each dose of INCB054828 should be taken immediately upon rising or after a 2-hour fast; subjects will fast for an additional 1 hour after taking study drug. Tablets will be available in strengths of 2 mg and 4.5 mg. The starting dose will be 13.5 mg. One cycle will be defined as 21 days.

**Reference Therapy, Dosage, and Mode of Administration:**

Not applicable.

**Study Schedule/Procedures:**

Subjects will have regularly scheduled study visits at the clinical site as part of a 21-day cycle. Study visits are as follows:

- Prescreening: To obtain FGF/FGFR status, if unknown (results within approximately 2 years of screening are valid for this study)
- Screening: Day -28 through Day -1
- Cycle 1: Days 1, 8, and 15
- Cycles 2+: Day 1
- End of treatment
- Safety follow-up: 30 days (+ 5 days) from date of last dose
- Follow-up for disease status and survival: Disease status follow-up every 9 weeks for subjects who discontinue for reasons other than disease progression. Survival follow-up every 12 weeks after discontinuation.

Local Laboratory Tests:

Study visits will include sample collection for hematology, chemistry, coagulation, endocrine monitoring, lipids, and urinalysis testing. Additionally, HIV screening (required for subjects outside of the US) and hepatitis screening (serology) will be done at screening; pregnancy testing will be done at screening, Day 1 of every cycle before dose administration, and EOT. FGF/FGFR status may be determined locally.

Central Laboratory Assessments:

Tumor tissue will be evaluated through the central laboratory for confirmation of FGF/FGFR alteration status.

Blood samples for population pharmacokinetic analysis [REDACTED] will be collected at various timepoints throughout the study and analyzed at the central laboratory or designee.



**Clinical Assessments:**

Adverse event assessments, vital signs, electrocardiograms, physical examinations, ECOG performance status, comprehensive eye examinations, and tumor and disease response assessments will be performed by the investigative site.

An objective assessment of disease status will be performed at screening. Subsequently, disease status including RECIST radiological response assessment will be assessed every 2 cycles for the first 4 cycles and every 3 cycles thereafter. A central radiology group will be contracted to provide centralized reading on all assessments.

**Estimated Duration of Participation:**

Up to 28 days are allowed for screening, followed by continuous treatment in consecutive 21-day cycles as long as subject is receiving benefit and has not met any criteria for study withdrawal, and 30 days (+5 days) for safety follow-up following the last dose of the study drug. Subjects will be followed-up for overall survival following documented disease progression.

**Estimated Number of Subjects:**

Approximately 140 subjects will be enrolled (approximately 100 subjects in Cohort A, and approximately 20 subjects into Cohort B and Cohort C [US only] each).

**Principal Coordinating Investigator:** TBD

**Statistical Methods:**

Primary analysis will be performed on FGFR2 translocated subjects. Approximately 100 subjects with documentation of FGFR2 translocation from the central genomics laboratory are planned for the final analysis of the primary endpoint of ORR. With the assumed rates of 33% for the intervention, a sample size of approximately 100 subjects would provide > 95% probability to have a 95% confidence interval with lower limit of > 15% assuming 10% lost to follow-up. Up to 20 subjects will be enrolled in Cohorts B and C (US only), respectively, which will provide > 80% chance of observing at least 4 responders in each cohort if the underlying ORR is 30%.

The proportion of subjects with ORR and DCR will be estimated with 95% CI. The PFS, DOR, and OS will be analyzed by the Kaplan-Meier method. Descriptive statistics will be summarized for safety data.

**Futility Analysis**

For Cohort A (FGFR2 translocations), futility analysis will be performed when approximately 25 subjects are enrolled into the cohort and have at least 1 tumor assessment or have permanently discontinued study treatment. Cohort A can be stopped for futility if 2 or less responders are observed, for which there is less than 10% probability of claiming ORR > 15% based on a 60 subject cohort, as initially planned before Amendment 5. This rule is just a guidance and nonbinding.

Cohorts B (other FGF/FGFR alterations) and C (US only; negative for FGF/FGFR alterations) can be stopped if 1 or less responders are observed within the first 10 subjects who have at least 2 cycles of data. This is just a guidance and nonbinding.

**Data Monitoring Committee:**

No independent Data Monitoring Committee is planned for this study. A study committee will be established and will include the investigators or designees, the sponsor representatives (eg, medical monitor), and when appropriate ad hoc experts.

## TABLE OF CONTENTS

|                                                                        |    |
|------------------------------------------------------------------------|----|
| SYNOPSIS .....                                                         | 3  |
| LIST OF ABBREVIATIONS.....                                             | 13 |
| 1. INTRODUCTION .....                                                  | 15 |
| 1.1. Background.....                                                   | 15 |
| 1.1.1. Fibroblast Growth Factor Receptor Inhibition in Oncology.....   | 15 |
| 1.1.2. Cholangiocarcinoma .....                                        | 16 |
| 1.2. Study Rationale.....                                              | 17 |
| 1.3. Potential Risks and Benefits of the Treatment Regimen.....        | 18 |
| 1.3.1. Potential Risks of INCB054828 Based on Preclinical Safety ..... | 18 |
| 1.3.2. Potential Risks of INCB054828 Based on Clinical Safety.....     | 19 |
| 1.3.2.1. Pharmacokinetic/Pharmacodynamic Summary .....                 | 23 |
| 1.3.3. Phototoxicity.....                                              | 25 |
| 2. STUDY OBJECTIVES AND ENDPOINTS.....                                 | 25 |
| 2.1. Study Objectives.....                                             | 25 |
| 2.1.1. Primary Objective.....                                          | 25 |
| 2.1.2. Secondary Objectives .....                                      | 25 |
| ██████████ .....                                                       | 25 |
| 2.2. Study Endpoints.....                                              | 25 |
| 2.2.1. Primary Endpoint.....                                           | 25 |
| 2.2.2. Secondary Endpoints .....                                       | 26 |
| ██████████ .....                                                       | 26 |
| 3. SUBJECT ELIGIBILITY .....                                           | 27 |
| 3.1. Subject Inclusion Criteria .....                                  | 27 |
| 3.2. Subject Exclusion Criteria .....                                  | 28 |
| 4. INVESTIGATIONAL PLAN.....                                           | 30 |
| 4.1. Overall Study Design.....                                         | 30 |
| 4.2. Measures Taken to Avoid Bias.....                                 | 31 |
| 4.3. Number of Subjects .....                                          | 32 |
| 4.3.1. Planned Number of Subjects .....                                | 32 |
| 4.3.2. Replacement of Subjects.....                                    | 32 |
| 4.4. Duration of Treatment and Subject Participation .....             | 32 |

|          |                                                                                   |    |
|----------|-----------------------------------------------------------------------------------|----|
| 4.5.     | Overall Study Duration.....                                                       | 32 |
| 4.6.     | Study Termination .....                                                           | 32 |
| 5.       | TREATMENT .....                                                                   | 33 |
| 5.1.     | Treatment Assignment.....                                                         | 33 |
| 5.1.1.   | Subject Numbering and Treatment Assignment.....                                   | 33 |
| 5.1.2.   | Randomization and Blinding.....                                                   | 33 |
| 5.2.     | Study Drug.....                                                                   | 33 |
| 5.2.1.   | INCB054828.....                                                                   | 33 |
| 5.2.1.1. | Description and Administration.....                                               | 33 |
| 5.2.1.2. | Supply, Packaging, and Labeling .....                                             | 33 |
| 5.2.1.3. | Storage.....                                                                      | 34 |
| 5.2.1.4. | Instruction to Subjects for Handling Study Drug (INCB054828).....                 | 34 |
| 5.3.     | Treatment Compliance.....                                                         | 34 |
| 5.4.     | Treatment Interruptions and Adjustments .....                                     | 35 |
| 5.4.1.   | Dose Modifications.....                                                           | 35 |
| 5.4.2.   | Criteria and Procedures for Dose Interruptions and Adjustments of Study Drug..... | 35 |
| 5.4.3.   | Management of Hyperphosphatemia.....                                              | 36 |
| 5.4.4.   | Criteria for Permanent Discontinuation of Study Drug.....                         | 36 |
| 5.5.     | Withdrawal of Subjects From Study Treatment .....                                 | 37 |
| 5.5.1.   | Withdrawal Criteria .....                                                         | 37 |
| 5.5.2.   | Withdrawal Procedures.....                                                        | 37 |
| 5.6.     | Withdrawal of Subjects From Study.....                                            | 38 |
| 5.7.     | Concomitant Medications.....                                                      | 38 |
| 5.7.1.   | Restricted Medications .....                                                      | 38 |
| 5.7.2.   | Prohibited Medications.....                                                       | 38 |
| 6.       | STUDY ASSESSMENTS .....                                                           | 38 |
| 6.1.     | Prescreening and Screening.....                                                   | 43 |
| 6.2.     | Treatment.....                                                                    | 43 |
| 6.3.     | End of Treatment.....                                                             | 43 |
| 6.4.     | Follow-Up.....                                                                    | 44 |
| 6.4.1.   | Safety Follow-Up.....                                                             | 44 |
| 6.4.2.   | Disease Status Follow-Up.....                                                     | 44 |





|       |                                                                                          |    |
|-------|------------------------------------------------------------------------------------------|----|
| 10.   | ETHICAL CONSIDERATIONS AND ADMINISTRATIVE PROCEDURES .....                               | 59 |
| 10.1. | Investigator Responsibilities.....                                                       | 59 |
| 10.2. | Accountability, Handling, and Disposal of Study Drug .....                               | 60 |
| 10.3. | Data Management .....                                                                    | 61 |
| 10.4. | Data Privacy and Confidentiality of Study Records.....                                   | 61 |
| 10.5. | Financial Disclosure .....                                                               | 62 |
| 10.6. | Publication Policy .....                                                                 | 62 |
| 11.   | REFERENCES .....                                                                         | 63 |
|       | APPENDIX A. INFORMATION REGARDING EFFECTIVENESS OF CONTRACEPTIVE METHODS .....           | 66 |
|       | APPENDIX B. POTENT CYP3A4 INDUCERS AND INHIBITORS .....                                  | 67 |
|       | APPENDIX C. PHARMACOKINETIC ANALYTICAL PARAMETERS .....                                  | 68 |
|       |  ..... | 69 |
|       | APPENDIX E. PROTOCOL AMENDMENT SUMMARY OF CHANGES.....                                   | 72 |

## LIST OF TABLES

|           |                                                                                                                                                                                                         |    |
|-----------|---------------------------------------------------------------------------------------------------------------------------------------------------------------------------------------------------------|----|
| Table 1:  | Subject Exposure in Study INCB 54828-101 .....                                                                                                                                                          | 19 |
| Table 2:  | Summary of Treatment-Emergent Adverse Events Occurring in $\geq 5\%$ of<br>Subjects in Decreasing Order of Frequency for Parts 1 and 2 Combined<br>(INCB054828 Monotherapy, Study INCB 54828-101) ..... | 21 |
| Table 3:  | Guidelines for Interruption and Restarting of Study Drug .....                                                                                                                                          | 35 |
| Table 4:  | Recommended Approach for Hyperphosphatemia Management.....                                                                                                                                              | 36 |
| Table 5:  | Study Assessments.....                                                                                                                                                                                  | 39 |
| Table 6:  | Laboratory Assessments .....                                                                                                                                                                            | 41 |
| Table 7:  | Laboratory Tests: Required Analytes .....                                                                                                                                                               | 42 |
| Table 8:  | ECOG Performance Status .....                                                                                                                                                                           | 48 |
| Table 9:  | Criteria for Clinically Notable Vital Sign Abnormalities.....                                                                                                                                           | 58 |
| Table 10: | Criteria for Clinically Notable Electrocardiogram Abnormalities .....                                                                                                                                   | 58 |

## LIST OF FIGURES

|           |                                                                                                                    |    |
|-----------|--------------------------------------------------------------------------------------------------------------------|----|
| Figure 1: | INCB054828 Plasma Concentrations (Mean $\pm$ SE) at Steady State After<br>13.5 mg QD Oral Doses of INCB054828..... | 24 |
| Figure 2: | Serum Phosphate Versus Exposure .....                                                                              | 24 |
| Figure 3: | Study Design.....                                                                                                  | 31 |

## LIST OF ABBREVIATIONS

The following abbreviations and special terms are used in this clinical study Protocol.

| Abbreviation | Definition                                                  |
|--------------|-------------------------------------------------------------|
| AE           | adverse event                                               |
| ALT          | alanine aminotransferase                                    |
| AST          | aspartate aminotransferase                                  |
| CFR          | Code of Federal Regulations                                 |
| CNS          | central nervous system                                      |
| CR           | complete response                                           |
| CT           | computed tomography                                         |
| CTCAE        | Common Terminology Criteria for Adverse Events              |
| D/C          | discontinue                                                 |
| DCR          | disease control rate                                        |
| DNA          | deoxyribonucleic acid                                       |
| DOR          | duration of response                                        |
| ECG          | electrocardiogram                                           |
| eCRF         | electronic case report form                                 |
|              |                                                             |
| EOT          | end of treatment                                            |
| FDA          | Food and Drug Administration                                |
| FGF          | fibroblast growth factor                                    |
| FGFR         | fibroblast growth factor receptor                           |
| GCP          | Good Clinical Practice                                      |
| HBV          | hepatitis B virus                                           |
| HCV          | hepatitis C virus                                           |
| HDL          | high-density lipoprotein                                    |
| HED          | human equivalent dose                                       |
| HIPAA        | Health Insurance Portability and Accountability Act of 1996 |
| HP           | hyperphosphatemia                                           |
| ICF          | informed consent form                                       |
| ICH          | International Conference on Harmonisation                   |
| IEC          | independent ethics committee                                |
| IN           | Investigator Notification                                   |
| INR          | international normalized ratio                              |
| IRB          | institutional review board                                  |



| <b>Abbreviation</b> | <b>Definition</b>                             |
|---------------------|-----------------------------------------------|
| IRT                 | interactive response technology               |
| LDL                 | low-density lipoprotein                       |
| MedDRA              | Medical Dictionary for Regulatory Activities  |
| MRI                 | magnetic resonance imaging                    |
| NCI                 | National Cancer Institute                     |
| NOAEL               | no-observed-adverse-effect level              |
| ORR                 | objective response rate                       |
| OS                  | overall survival                              |
| PD                  | progressive disease                           |
| PFS                 | progression-free survival                     |
| PK                  | pharmacokinetics                              |
| PR                  | partial response                              |
| PT                  | prothrombin time                              |
| PTT                 | partial thromboplastin time                   |
| QD                  | once daily                                    |
| █                   | █                                             |
| RECIST              | Response Evaluation Criteria in Solid Tumors  |
| RNA                 | ribonucleic acid                              |
| SAE                 | serious adverse event                         |
| SD                  | stable disease                                |
| SF                  | screen fail                                   |
| SUSAR               | suspected unexpected serious adverse reaction |
| TEAE                | treatment-emergent adverse event              |
| ULN                 | upper limit of normal                         |
| WBC                 | white blood cell                              |

## 1. INTRODUCTION

### 1.1. Background

INCB054828 is an inhibitor of the fibroblast growth factor receptor (FGFR) family of receptor tyrosine kinases that is proposed for the treatment of cholangiocarcinoma. Aberrant signaling through FGFR resulting from gene amplification or mutation, chromosomal translocation, and ligand-dependent activation of the receptors has been demonstrated in multiple types of human cancers. Fibroblast growth factor receptor signaling contributes to the developing of malignancies by promoting tumor cell proliferation, survival, migration, and angiogenesis. Incyte is proposing to study INCB054828 for the treatment of advanced/metastatic or surgically unresectable cholangiocarcinoma. Refer to the Investigator's Brochure (IB) for additional background information on INCB054828.

#### 1.1.1. Fibroblast Growth Factor Receptor Inhibition in Oncology

The mammalian FGFR family is composed of 4 highly conserved receptors (FGFR1, FGFR2, FGFR3, and FGFR4) that have an extracellular ligand binding domain, a single transmembrane domain, and an intracellular tyrosine kinase domain. Eighteen fibroblast growth factor (FGF) ligands, divided into canonical and hormonal FGFRs, bind to FGFRs leading to receptor dimerization, activation of the kinase domain, and transphosphorylation of the receptors (Eswarakumar et al 2005). Subsequent signal transduction occurs through phosphorylation of substrate proteins such as FGFR substrate 2 that leads to activation of the RAS-mitogen-activated protein kinase and phosphoinositide 3-kinase–protein kinase B pathways and phospholipase C $\gamma$  that activates the protein kinase C pathway. In some cellular context, signal transducer and activator of transcription proteins are also activated by FGFRs. Signaling through the FGF-FGFR pathway is tightly controlled through feedback regulation. Mitogen-activated protein kinase phosphatases and Sprouty proteins are upregulated upon FGFR stimulation and antagonize FGF-dependent activation of extracellular signal-regulated kinases. In many cases, FGFR pathway activation promotes cell proliferation, survival, and migration; however, cellular context plays an important role, and in certain tissues, FGFR signaling results in growth arrest and cellular differentiation (Dailey et al 2005).

In adults, FGF-FGFR signaling is involved in angiogenesis during wound healing. The hormonal FGF ligands contribute to regulation of metabolic pathways involving lipid, glucose, phosphate, and vitamin D (Itoh 2010). Genetic defects in the FGF23-signaling pathway lead to disordered phosphate metabolism: loss of function mutations in FGF23 or its signaling result in retention of phosphate and tissue mineralizing, while gain of function mutations in the FGF23 pathway manifests as hypophosphatemic Rickets syndrome (Farrow and White 2010).

There is strong genetic and functional evidence that dysregulation of FGFR can lead to the establishment and progression of cancer. Genetic alterations in FGFR1, FGFR2, and FGFR3 have been described in many tumor types (Knights and Cook 2010, Turner and Grose 2010). These include activating mutations, translocations, and gene amplification resulting in ligand independent, constitutive activation of the receptors or aberrant ligand-dependent signaling through FGFRs.

Dysregulation of FGF ligands has also been reported in many human cancers. Preclinical studies have shown that high levels of FGF ligands such as FGF2 promote cancer cell resistance to radiation, chemotherapeutics, and targeted cancer drugs (Fuks et al 1994, Pardo et al 2002, Terai et al 2013). Clinically, detection of high levels of FGF2 in tumors is associated with poorer outcome in several tumor types including NSCLC (Donnem et al 2009, Rades et al 2012).

A substantial body of evidence supports that genetically activated FGFR pathway sensitizes FGFR-altered cancer cells to knockdown or inhibition of these receptors (Kunii et al 2008, Qing et al 2009, Weiss et al 2010, Lamont et al 2011). A large screen of more than 500 tumor cell lines with a selective FGFR inhibitor demonstrated that only a small percentage (5.9%) of all cells are sensitive to FGFR inhibition, and growth suppressed cell lines were highly enriched for FGFR alterations (Guagnano et al 2012). These results demonstrate that FGFR inhibitors are active in a targeted manner against cancers with activated FGFR pathway. An implication of these data is that selection based on molecular-, genetic-, or protein-based diagnostic tests for specific FGFR alterations in tumors may be important for identifying patients most likely to benefit from an FGFR inhibitor.

Results from early clinical studies of selective FGFR inhibitors, including INCB054828 have shown a tolerable safety profile for the class and preliminary signs of clinical benefit in subjects with FGF/FGFR alterations. An on-target pharmacologic effect of FGFR inhibition in clinical studies is hyperphosphatemia (HP). In the ongoing INCB 54828-101 study, at the recommended Phase 2 dose (RP2D) of 13.5 mg, 100% of subjects developed HP (> 5.5 mg/mL). Hyperphosphatemia has been managed with diet modifications and phosphate binders.

INCB054828 is a potent selective inhibitor of FGFR1, FGFR2, and FGFR3 and is proposed for the treatment of subjects with advanced/metastatic or surgically unresectable cholangiocarcinoma who have FGFR2 translocation, have other FGF/FGFR alteration, or are negative for FGF/FGFR alterations.

### **1.1.2. Cholangiocarcinoma**

Cholangiocarcinoma, also known as bile duct carcinoma, is found in the intra- or extrahepatic bile ducts. It is the second most common primary liver cancer but only accounts for approximately 3% of all gastrointestinal cancers (Rizvi and Gores 2013). First line therapy is typically gemcitabine and cisplatin with a response rate of 30% to 50% (Eckman et al 2011) and the 5-year survival rate is 11.5% (NCI 2016).

The incidence of cholangiocarcinoma is quite rare, with 1 to 2 patients per 100,000 in regions like the US and the UK; however in regions like Southeast Asia, liver fluke and other parasitic infections give rise to a much higher incidence (113 per 100,000; Bergquist and von Seth 2015).

Fibroblast growth factor receptor 2 translocations are the most common FGFR alteration in cholangiocarcinoma and associated with a more indolent disease state (Churi et al 2014, Wu et al 2013). These fusions are found in 13% to 15% of patients with intrahepatic cholangiocarcinoma (Graham et al 2014). Intrahepatic disease accounts for 5% of all cholangiocarcinoma, with 95% of patients having extrahepatic disease (Blechacz and Gores 2008) however recent data indicates a rise in intrahepatic disease (Bergquist and von Seth 2015). Other FGF/FGFR alterations are not as common but can be found in the extrahepatic cholangiocarcinoma patients (Bergquist and von Seth 2015).

## 1.2. Study Rationale

Cancer has several common characteristics that can be observed across numerous tumor types. One common characteristic is the uncontrolled growth and survival of cells and their ability to become invasive throughout the body. Fibroblast growth factor signaling produces mitogenic, antiapoptotic, and angiogenic responses in cells, which leads to a deregulated state. Evidence from several in vitro and in vivo tumor models has established the FGFs and FGFRs as oncogenes and their expression has been found in numerous solid tumors or hematological malignancies. Several genetic alterations have been shown to generate overexpression of the FGF receptor, produce a receptor that is constitutively active, or lead it to a state where there is reduced dependence on ligand binding for activation ([Knights and Cook 2010](#)).

Tyrosine kinases are an especially important target in cancer therapy as they have a key role in growth factor signaling. Several tyrosine kinase inhibitors have been shown to be effective antitumor agents and have been approved in multiple oncology indications ([Arora and Scholar 2005](#)). INCB054828 is a potent inhibitor of the kinase activity of FGFR1, FGFR2, and FGFR3 and has been shown to inhibit growth in several tumor models.

The planned study will evaluate the efficacy, safety, and tolerability of INCB054828 in subjects with advanced/metastatic or surgically unresectable cholangiocarcinoma with FGFR2 translocations, FGF/FGFR alterations and without FGF/FGFR alterations. Subjects with FGFR2 translocations are found in approximately 15% of subjects with intrahepatic cholangiocarcinoma ([Arai et al 2013](#), [Ross et al 2014](#), [Ang 2015](#)).

Preliminary data from the ongoing Phase 1 study INCB54828-101 has shown a tolerable safety profile and signs of efficacy in tumors that have FGF/FGFR genetic alterations. In the ongoing Phase 1 study, more than 25 subjects have been treated at dose levels ranging from 1 to 20 mg once daily for 2 weeks followed by 1 week off in 21-day cycles. The recommended Phase 2 starting dose has been established at 13.5 mg once daily following the 2 weeks on/1 week off regimen. This dose was recommended based on safety, pharmacokinetics (PK), and preliminary signals of clinical benefit. One subject with FGFR2-CCDC6 cholangiocarcinoma has been treated with 9 mg of INCB054828 with a confirmed partial response (PR).

In addition, a Phase 2 study of BGJ398 in subjects with FGFR-altered cholangiocarcinoma, the most frequently reported adverse event (AE) was HP, followed by fatigue, stomatitis, and alopecia. Hyperphosphatemia was the leading dose-limiting toxicity resulting in interruptions and discontinuations. The efficacy results of this compound in the ongoing Phase 2 study have shown an overall response rate of 18.8% among 48 subjects with FGFR2 fusions ([Javle et al 2018](#)).

Amendment 5 (03 OCT 2017) increases the number of subjects enrolled into Cohort A (FGFR2 translocation) from 60 to 100 subjects. The rationale for increasing the number of subjects enrolled into this cohort is to assure the most robust efficacy data to inform future development decisions. As the primary analysis will be based solely on Cohort A, this amendment does not increase the number of subjects in Cohorts B and C. Futility analysis will be performed as initially planned (before Amendment 5), when approximately 25 subjects are enrolled into Cohort A and have at least 1 tumor assessment or have permanently discontinued study treatment.

See Section 9 for the impact on reporting of the primary endpoint.

### 1.3. Potential Risks and Benefits of the Treatment Regimen

#### 1.3.1. Potential Risks of INCB054828 Based on Preclinical Safety

The most prominent findings following repeat-dose exposure to INCB054828 in both rats and monkeys were HP, physéal dysplasia, and soft tissue mineralization. Mineralization was observed in numerous tissues including the kidney, stomach, arteries (gastric and pulmonary), ovaries (monkey only), and eyes (cornea; rat only). Soft tissue mineralization was not reversible, while physéal and cartilage findings were reversible.

Hyperphosphatemia, physéal dysplasia, and soft tissue mineralization have been reported in rodents and large animals following administration of selective FGFR inhibitors ([Brown et al 2005](#), [Brown 2010](#), [Wöhrle et al 2011](#), [Yanochko et al 2013](#)). These observations can be explained by the pharmacological action of FGFR inhibition. Fibroblast growth factor 23 (FGF 23)–mediated signaling negatively affects renal vitamin D biosynthesis by transcriptional repression of CYP27B1, which catalyzes the production of the biologically active vitamin D metabolite 1,25(OH)2D3, and by induction of CYP24A1, which converts 1,25(OH)2D3 into a metabolite that is less biologically active. Additionally, it has been published that FGF-23 suppresses renal phosphate reabsorption by decreasing the expression of the sodium-phosphate cotransporters NPT2A and NPT2C in the brush-border membrane of proximal tubule epithelial cells ([Baum et al 2005](#), [Shimada et al 2001](#), [Shimada et al 2004a](#), [Shimada et al 2004b](#)). Wöhrle et al (2011) demonstrated that FGFR inhibition by oral administration of PD176067 counteracts the biologic activity of FGF-23 in the kidney, leading to HP and hypervitaminosis D.

In rats, the mineralization was similar in distribution and morphology to that occasionally observed in normal animals; thus it is likely that the increased incidence of mineralization in various tissues at these doses represents a test article–related exacerbation of a spontaneously occurring condition. While soft tissue mineralization was not reversible during 28-day recovery period, there was also no evidence of progression or worsening of this effect. Soft tissue mineralization in monkeys was observed only at 3 mg/kg per day in the 10-day range-finding study and was not assessed for reversibility. No evidence of mineralization was found at the doses tested in the 28-day study in monkeys.

Moderate lens opacities (capsule, posterior) in one 0.33 mg/kg per day and one 1 mg/kg per day males and slight attenuation of retinal vessels in one 1 mg/kg per day female were observed in monkeys at the end-of-treatment (EOT) period on the 28-day Good Laboratory Practice study. These findings were not present during the pretest period and thus a relationship to INCB054828 cannot be dismissed. However, lens opacities are occasionally observed in normal cynomolgus monkeys of similar age and origin according to the testing facility historical control data. Persistence of lens opacity in 1 animal at the end of recovery period suggests that this finding is not reversible.

Fully reversible mild-to-moderate elevation of alanine aminotransferase (ALT) and aspartate aminotransferase (AST) were noted at the EOT period in the 28-day monkey study at doses  $\geq 0.33$  mg/kg per day; these changes were not associated with changes in other hepatobiliary parameters or microscopic changes in the liver. These changes may be related to FGFR4 inhibition, which is known to result in increases in liver function tests without histological correlates ([Pai et al 2012](#)).

In the 28-day study in rats, no severe toxicity was observed; the no-observed-adverse-effect level (NOAEL) was determined as 1.05 mg/kg per day (6.3 mg/m<sup>2</sup> per day), the highest dose tested. The human equivalent dose (HED) associated with 1.05 mg/kg per day based on standard body surface area conversion is 10.1 mg. In the 28-day monkey study, no severe toxicity was observed. The NOAEL was considered to be 1 mg/kg per day (12 mg/m<sup>2</sup> per day), the highest dose tested. The HED associated with 1 mg/kg per day based on standard body surface area conversion is 19.2 mg.

More information can be found in the [IB](#).

### 1.3.2. Potential Risks of INCB054828 Based on Clinical Safety

The recommended Phase 2 dose has been selected based from the INCB 54828-101 study, which is the first clinical study being conducted with INCB054828. Doses ranging from 1 mg to 20 mg once daily (QD) have been evaluated to date. Pharmacokinetics and pharmacodynamics have been evaluated in each of these cohorts to assess the extent of target inhibition, which in turn was used along with the safety data to select a dose for Phase 2 studies.

Of the 60 subjects who have been enrolled into Study INCB 54828-101 as of the data cutoff date (25 NOV 2016), 22 subjects have been administered INCB054828 in Part 1 (monotherapy dose escalation), 21 subjects in Part 2 (monotherapy dose expansion), and 17 subjects in Part 3 (combination therapy). The duration of treatment with INCB054828 in Part 1 and Part 2 combined and Part 3 ranged from 1 to 49 weeks and from 2 to 27 weeks, respectively. Subject exposure is presented in [Table 1](#). The monotherapy maximum tolerated dose has not been reached in Part 1. The maximum safely administered dose was 20 mg. One dose-limiting toxicity (Grade 3 stomatitis) was observed at 20 mg. The recommended Part 2 dose has been determined at 13.5 mg based on pharmacodynamic and clinical effect.

**Table 1: Subject Exposure in Study INCB 54828-101**

| Treatment                                      | Number of Subjects | Minimum (Weeks) | Maximum (Weeks) |
|------------------------------------------------|--------------------|-----------------|-----------------|
| Total number of subjects exposed to INCB054828 | 60                 | 1               | 49              |
| <b>INCB054828 monotherapy: Part 1</b>          | <b>22</b>          | <b>1</b>        | <b>44</b>       |
| 1 mg, 2 mg, 4 mg <sup>a</sup>                  | 3                  | 2               | 8               |
| 6 mg                                           | 4                  | 2               | 14              |
| 9 mg                                           | 3                  | 8               | 44              |
| 13.5 mg                                        | 6                  | 5               | 17              |
| 20 mg                                          | 6                  | 1               | 20              |
| <b>INCB054828 monotherapy: Part 2</b>          | <b>21</b>          | <b>1</b>        | <b>49</b>       |
| 9 mg                                           | 3                  | 17              | 49              |
| 13.5 mg                                        | 18                 | 1               | 26              |
| <b>INCB054828 in combination: Part 3</b>       | <b>17</b>          | <b>2</b>        | <b>27</b>       |
| INCB054828 9 mg + pembrolizumab                | 3                  | 4               | 10              |
| INCB054828 13.5 mg + pembrolizumab             | 5                  | 2               | 27              |
| INCB054828 13.5 mg + gemcitabine + cisplatin   | 4                  | 4               | 20              |
| INCB054828 13.5 mg + docetaxel                 | 5                  | 6               | 16              |

<sup>a</sup> One subject at each dose.

In Parts 1 and 2 combined of Study INCB 54828-101, the most frequently reported treatment-emergent AE (TEAE) was HP (48.8%; serum phosphate > 5.5 mg/dL), which is expected from inhibition of FGFR signaling and is used as a pharmacodynamic measure in the study.

Treatment-emergent adverse events, regardless of causality, occurring in  $\geq 5\%$  of subjects are presented in Table 2. Eighteen subjects (41.9%) had  $\geq$  Grade 3 TEAEs, 7 of which were considered related to INCB054828 by the investigator: fatigue and palmar-plantar erythrodysesthesia syndrome (9 mg dose); convulsion, fatigue, onycholysis, paronychia, and stomatitis (13.5 mg dose); and stomatitis and palmar-plantar erythrodysesthesia syndrome (20 mg dose).

Thirteen subjects experienced 21 serious AEs (SAEs). Serious AEs that occurred in more than 1 subject were pneumonia (9.3%) and disease progression (4.7%). In the 13.5 mg dose cohort, 1 SAE of seizure was considered related to study drug by the investigator; the subject was hospitalized, received treatment for the seizure, the event resolved, and the subject subsequently died due to disease progression. Additionally, the subject had underlying history of cardiovascular disease, hypertension, and orthostatic hypotension. No other SAEs were considered related to study drug. Four subjects had fatal events: disease progression (2 subjects), pneumonia, and intracranial hemorrhage (1 subject each).

Nine SAEs in 6 subjects in Part 1 and Part 2 were identified from the safety database. In the 9 mg dose cohort, 1 subject had SAEs of dyspnea and musculoskeletal chest pain. In the 13.5 mg cohort, 1 subject had 2 SAEs of pneumonia and 1 SAE of atrial fibrillation, and 3 subjects had SAEs of systemic inflammatory response syndrome, disease progression, and vomiting (1 subject per event). In the 20 mg cohort, 1 subject had an SAE of pulmonary embolism. The SAE of disease progression was fatal. None of the SAEs were considered related to INCB054828 by the investigator.

One subject, receiving 4 mg of INCB054828, permanently discontinued treatment of INCB054828 because of a TEAE (depressed level of consciousness due to progressive disease of the brain).

**Table 2: Summary of Treatment-Emergent Adverse Events Occurring in ≥ 5% of Subjects in Decreasing Order of Frequency for Parts 1 and 2 Combined (INCB054828 Monotherapy, Study INCB 54828-101)**

| MedDRA Preferred Term                | INCB054828          |                 |                 |                     |                  |           | Total No. of Subjects (%)<br>(N = 43) |
|--------------------------------------|---------------------|-----------------|-----------------|---------------------|------------------|-----------|---------------------------------------|
|                                      | 1/2/4 mg<br>(N = 3) | 6 mg<br>(N = 4) | 9 mg<br>(N = 6) | 13.5 mg<br>(N = 24) | 20 mg<br>(N = 6) |           |                                       |
| Hyperphosphatemia                    | 0 (0.0)             | 1 (25.0)        | 3 (50.0)        | 13 (54.2)           | 4 (66.7)         | 21 (48.8) |                                       |
| Fatigue                              | 1 (33.3)            | 1 (25.0)        | 4 (66.7)        | 11 (45.8)           | 2 (33.3)         | 19 (44.2) |                                       |
| Dry mouth                            | 0 (0.0)             | 1 (25.0)        | 2 (33.3)        | 6 (25.0)            | 2 (33.3)         | 11 (25.6) |                                       |
| Alopecia                             | 0 (0.0)             | 0 (0.0)         | 3 (50.0)        | 5 (20.8)            | 1 (16.7)         | 9 (20.9)  |                                       |
| Diarrhea                             | 0 (0.0)             | 1 (25.0)        | 1 (16.7)        | 4 (16.7)            | 2 (33.3)         | 8 (18.6)  |                                       |
| Stomatitis                           | 0 (0.0)             | 0 (0.0)         | 1 (16.7)        | 3 (12.5)            | 4 (66.7)         | 8 (18.6)  |                                       |
| Anemia                               | 1 (33.3)            | 0 (0.0)         | 1 (16.7)        | 4 (16.7)            | 1 (16.7)         | 7 (16.3)  |                                       |
| Decreased appetite                   | 0 (0.0)             | 2 (50.0)        | 1 (16.7)        | 4 (16.7)            | 0 (0.0)          | 7 (16.3)  |                                       |
| Dehydration                          | 1 (33.3)            | 1 (25.0)        | 0 (0.0)         | 4 (16.7)            | 1 (16.7)         | 7 (16.3)  |                                       |
| Dysgeusia                            | 1 (33.3)            | 0 (0.0)         | 2 (33.3)        | 2 (8.3)             | 2 (33.3)         | 7 (16.3)  |                                       |
| Vision blurred                       | 1 (33.3)            | 1 (25.0)        | 2 (33.3)        | 2 (8.3)             | 1 (16.7)         | 7 (16.3)  |                                       |
| Weight decreased                     | 2 (66.7)            | 0 (0.0)         | 1 (16.7)        | 2 (8.3)             | 1 (16.7)         | 6 (14.0)  |                                       |
| Constipation                         | 0 (0.0)             | 0 (0.0)         | 0 (0.0)         | 5 (20.8)            | 0 (0.0)          | 5 (11.6)  |                                       |
| Cough                                | 1 (33.3)            | 0 (0.0)         | 0 (0.0)         | 3 (12.5)            | 1 (16.7)         | 5 (11.6)  |                                       |
| Epistaxis                            | 0 (0.0)             | 0 (0.0)         | 1 (16.7)        | 3 (12.5)            | 1 (16.7)         | 5 (11.6)  |                                       |
| Nausea                               | 1 (33.3)            | 1 (25.0)        | 1 (16.7)        | 2 (8.3)             | 0 (0.0)          | 5 (11.6)  |                                       |
| Pain in extremity                    | 0 (0.0)             | 1 (25.0)        | 2 (33.3)        | 1 (4.2)             | 1 (16.7)         | 5 (11.6)  |                                       |
| Abdominal pain                       | 0 (0.0)             | 0 (0.0)         | 1 (16.7)        | 3 (12.5)            | 0 (0.0)          | 4 (9.3)   |                                       |
| Aspartate aminotransferase increased | 1 (33.3)            | 0 (0.0)         | 0 (0.0)         | 3 (12.5)            | 0 (0.0)          | 4 (9.3)   |                                       |
| Back pain                            | 1 (33.3)            | 0 (0.0)         | 2 (33.3)        | 1 (4.2)             | 0 (0.0)          | 4 (9.3)   |                                       |
| Dry eye                              | 0 (0.0)             | 0 (0.0)         | 0 (0.0)         | 3 (12.5)            | 1 (16.7)         | 4 (9.3)   |                                       |
| Dyspnea                              | 0 (0.0)             | 1 (25.0)        | 0 (0.0)         | 1 (4.2)             | 2 (33.3)         | 4 (9.3)   |                                       |
| Hyponatremia                         | 0 (0.0)             | 0 (0.0)         | 1 (16.7)        | 2 (8.3)             | 1 (16.7)         | 4 (9.3)   |                                       |
| Hypophosphatemia                     | 0 (0.0)             | 0 (0.0)         | 1 (16.7)        | 2 (8.3)             | 1 (16.7)         | 4 (9.3)   |                                       |
| Musculoskeletal pain                 | 0 (0.0)             | 1 (25.0)        | 1 (16.7)        | 2 (8.3)             | 0 (0.0)          | 4 (9.3)   |                                       |
| Pneumonia                            | 0 (0.0)             | 0 (0.0)         | 2 (33.3)        | 1 (4.2)             | 1 (16.7)         | 4 (9.3)   |                                       |
| Vomiting                             | 1 (33.3)            | 0 (0.0)         | 1 (16.7)        | 2 (8.3)             | 0 (0.0)          | 4 (9.3)   |                                       |



**Table 2: Summary of Treatment-Emergent Adverse Events Occurring in ≥ 5% of Subjects in Decreasing Order of Frequency for Parts 1 and 2 Combined (INCB054828 Monotherapy, Study INCB 54828-101) (Continued)**

| MedDRA Preferred Term              | INCB054828          |                 |                 |                     |                  |         | Total No. of Subjects (%)<br>(N = 43) |
|------------------------------------|---------------------|-----------------|-----------------|---------------------|------------------|---------|---------------------------------------|
|                                    | 1/2/4 mg<br>(N = 3) | 6 mg<br>(N = 4) | 9 mg<br>(N = 6) | 13.5 mg<br>(N = 24) | 20 mg<br>(N = 6) |         |                                       |
| Alanine aminotransferase increased | 1 (33.3)            | 0 (0.0)         | 0 (0.0)         | 2 (8.3)             | 0 (0.0)          | 3 (7.0) |                                       |
| Ascites                            | 0 (0.0)             | 0 (0.0)         | 0 (0.0)         | 2 (8.3)             | 1 (16.7)         | 3 (7.0) |                                       |
| Dyspepsia                          | 0 (0.0)             | 0 (0.0)         | 1 (16.7)        | 2 (8.3)             | 0 (0.0)          | 3 (7.0) |                                       |
| Hypercalcemia                      | 1 (33.3)            | 0 (0.0)         | 0 (0.0)         | 2 (8.3)             | 0 (0.0)          | 3 (7.0) |                                       |
| Hypoesthesia                       | 0 (0.0)             | 1 (25.0)        | 1 (16.7)        | 0 (0.0)             | 1 (16.7)         | 3 (7.0) |                                       |
| Hypoalbuminemia                    | 0 (0.0)             | 0 (0.0)         | 0 (0.0)         | 3 (12.5)            | 0 (0.0)          | 3 (7.0) |                                       |
| Hypokalemia                        | 1 (33.3)            | 1 (25.0)        | 1 (16.7)        | 0 (0.0)             | 0 (0.0)          | 3 (7.0) |                                       |
| Pain                               | 0 (0.0)             | 1 (25.0)        | 0 (0.0)         | 1 (4.2)             | 1 (16.7)         | 3 (7.0) |                                       |
| Paronychia                         | 0 (0.0)             | 0 (0.0)         | 0 (0.0)         | 2 (8.3)             | 1 (16.7)         | 3 (7.0) |                                       |
| Upper respiratory tract infection  | 1 (33.3)            | 0 (0.0)         | 0 (0.0)         | 1 (4.2)             | 1 (16.7)         | 3 (7.0) |                                       |
| Vitamin D deficiency               | 0 (0.0)             | 0 (0.0)         | 1 (16.7)        | 2 (8.3)             | 0 (0.0)          | 3 (7.0) |                                       |
| Wheezing                           | 0 (0.0)             | 1 (25.0)        | 0 (0.0)         | 1 (4.2)             | 1 (16.7)         | 3 (7.0) |                                       |

Note: Subjects were counted once under each MedDRA preferred term. Adverse events are ordered by the descending frequency in total column.

Note: Treatment-emergent adverse events are any AEs either reported for the first time or worsening of a pre-existing event after first dose of study medication.

In Part 3 of Study INCB 54828-101, the most frequently reported TEAE was HP (58.8%; serum phosphate > 5.5 mg/dL). Other TEAEs, regardless of causality, occurring in 2 or more subjects are presented in the IB (version 3, Table 17). Eight subjects (47.1%) had  $\geq$  Grade 3 TEAEs, 3 of which were considered related to INCB054828 by the investigator: neutropenia in the docetaxel + INCB054828 13.5 mg cohort (Grade 4), ALT increased in the gemcitabine + cisplatin + INCB054828 13.5 mg cohort (Grade 3), and platelet count decreased in the gemcitabine + cisplatin + INCB054828 9 mg cohort (Grade 3).

Seven subjects had 13 SAEs. In the gemcitabine + cisplatin + INCB054828 cohorts, the SAEs were constipation and febrile neutropenia (INCB054828 9 mg) and disease progression, esophageal candidiasis, dehydration, and acute renal failure (INCB054828 13.5 mg). In the docetaxel + INCB054828 13.5 mg cohort, the SAEs were anemia, tumor hemorrhage, and abdominal pain. In the pembrolizumab + INCB054828 cohort, the SAEs were completed suicide (INCB054828 9 mg), and gastrointestinal hemorrhage, and hypotension (INCB054828 13.5 mg each subject). No SAEs occurred in more than 1 subject, and no SAEs were considered related to INCB054828 by the investigator. Two subjects had fatal events in Part 3: completed suicide (pembrolizumab + INCB054828 9 mg) and disease progression (gemcitabine + cisplatin + INCB054828 13.5 mg).

In Part 3, 3 SAEs in 3 subjects were identified from the safety database. In the docetaxel + INCB054828 13.5 mg cohort, 1 subject had an SAE of enterocolitis, and another subject had an SAE of pulmonary embolism. One subject in the pembrolizumab + INCB054828 cohort had an SAE of femur fracture. None of the SAEs were considered related to INCB054828 by the investigator.

One subject permanently discontinued treatment of INCB054828 in the gemcitabine + cisplatin + INCB054828 13.5 mg cohort because of TEAEs (disease progression and acute renal failure).

#### 1.3.2.1. Pharmacokinetic/Pharmacodynamic Summary

INCB054828 exhibited linear PK over the dose range evaluated, with rapid oral absorption and a biphasic elimination, with a terminal half-life range of 10.9 to 31.4 hours. The projected average inhibition of FGFR2 based on PK and *in vitro* potency of INCB054828 ranged from 41% at 1 mg to 97% at 20 mg. Consistent with this projection, the observed inhibition of pFGFR2 in KATOIII cells spiked to *ex vivo* whole blood samples collected from subjects at trough was 82% after the 13.5 mg QD dose and 64% after the 9 mg QD dose. The steady-state plasma concentrations of INCB054828 after 13.5 mg QD dose that exceeded *in vivo* IC<sub>50</sub> over a 24-hour dosing period is showed in Figure 1. The magnitude and frequency of HP was also dose-dependent. In the 9 mg cohort, 1 of 3 subjects developed HP in Part 1; 3 additional subjects were enrolled at 9 mg in Part 2. Of a total of 6 subjects administered 9 mg, 4 experienced HP; in the 13.5 mg cohort, all 6 subjects developed HP, which was managed with a low-phosphate diet and introduction of phosphate binders. Further, the increase in serum phosphorus observed after treatment with INCB054828 was exposure-dependent (see Figure 2).

**Figure 1: INCB054828 Plasma Concentrations (Mean  $\pm$  SE) at Steady State After 13.5 mg QD Oral Doses of INCB054828**

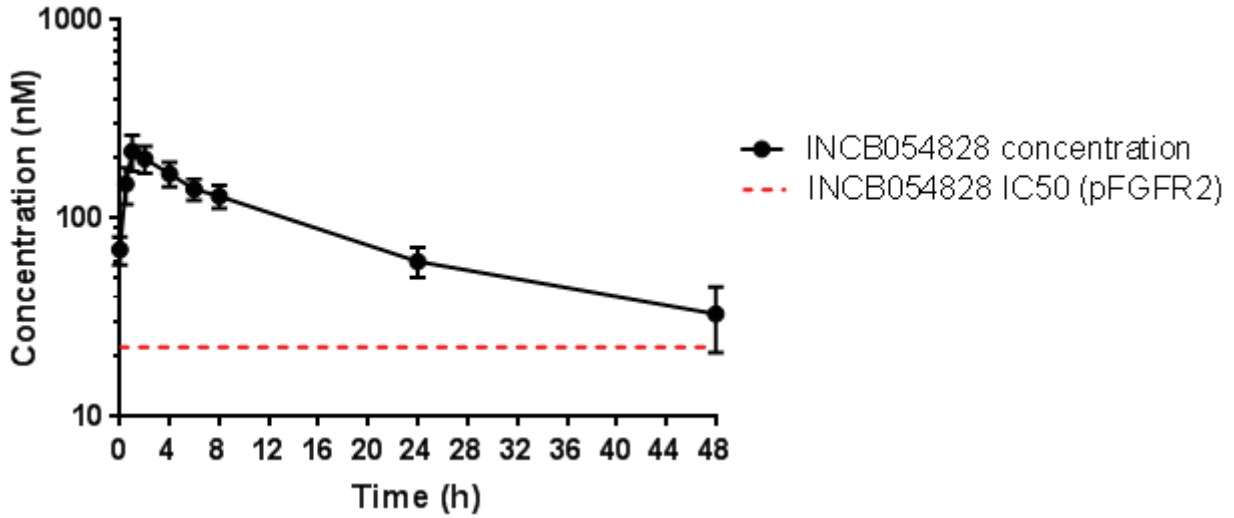

**Figure 2: Serum Phosphate Versus Exposure**

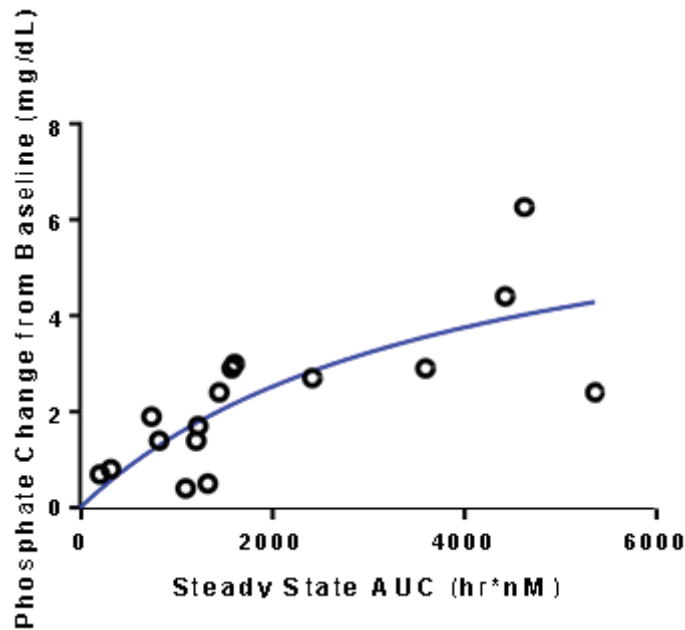

Therefore, based on a manageable safety profile and a favorable PK/PD profile, the targeted starting dose for this Phase 2 is 13.5 mg. This dose will be tested in 2 additional Phase 2 studies in subjects with bladder cancer (INCB 54828-201) and myeloproliferative neoplasms (INCB 54828-203).

Subjects will be monitored on an ongoing basis throughout this study as per the schedules of assessments (Table 5 and Table 6).

### **1.3.3. Phototoxicity**

INCB054828 did not demonstrate phototoxic potential in preclinical studies (refer to the [IB](#) for more information). As a result, no subject precautions are required to protect from sun/ultraviolet light.

## **2. STUDY OBJECTIVES AND ENDPOINTS**

### **2.1. Study Objectives**

#### **2.1.1. Primary Objective**

The primary objective of this study is to evaluate the efficacy of INCB054828 in subjects with advanced/metastatic or surgically unresectable cholangiocarcinoma with FGFR2 translocation who have failed at least 1 previous treatment.

#### **2.1.2. Secondary Objectives**

The secondary objectives are:

- To evaluate the efficacy of INCB054828 in subjects with advanced/metastatic or surgically unresectable cholangiocarcinoma with different molecular subgroups.
- To evaluate the safety of INCB054828 in subjects with advanced/metastatic or surgically unresectable cholangiocarcinoma.
- To identify and evaluate covariates that may influence the PK of INCB054828 in this subject population through population PK analysis. Additionally, exposure-response analyses for key efficacy and safety parameters will also be considered if sufficient data are available.

### **2.2. Study Endpoints**

The genomic testing results from the central laboratory will be used to determine cohort allocation for primary and secondary endpoint analyses.

#### **2.2.1. Primary Endpoint**

The primary endpoint of this study is to determine the objective response rate (ORR) in subjects with FGFR2 translocations based on the central genomics laboratory results. Objective response rate is defined as the proportion of subjects who achieved a complete response (CR; disappearance of all target lesions) or a PR ( $\geq 30\%$  decrease in the sum of the longest diameters

of target lesions) based on RECIST v1.1. Clinical response will be determined by an independent radiological review committee.

### **2.2.2. Secondary Endpoints**

The secondary endpoints for this study include:

- ORR in subjects with FGF/FGFR alterations other than FGFR2 translocations (Cohort B).
- ORR in all subjects with FGF/FGFR alterations (Cohorts A and B).
- ORR in subjects negative for FGF/FGFR alterations (Cohort C [US only]).
- Progression-free survival (PFS = first dose to progressive disease [PD] or death; all cohorts).
- Duration of response (DOR = time from the date of CR or PR until PD; all cohorts).
- Disease control rate (DCR = CR + PR + stable disease [SD]; all cohorts).
- Overall survival (OS = first dose to death of any cause; all cohorts).
- Safety and tolerability will be assessed by evaluating the frequency, duration, and severity of AEs; through review of findings of physical examinations, changes in vital signs, and electrocardiograms (ECGs); and through clinical laboratory blood and urine sample evaluations (all cohorts).
- Population PK (all cohorts).

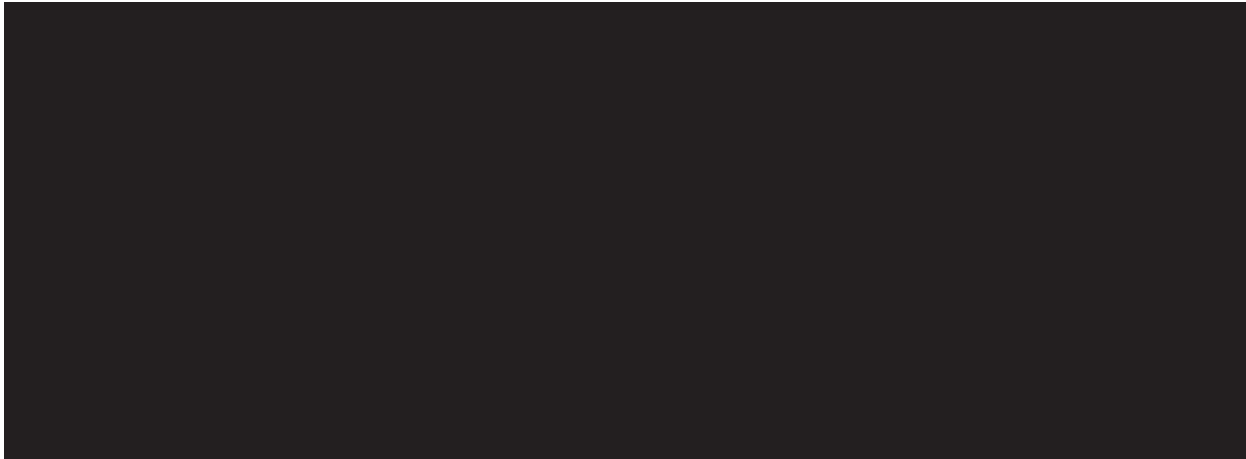

### 3. SUBJECT ELIGIBILITY

Deviations from eligibility criteria are not allowed because they can potentially jeopardize the scientific integrity of the study, regulatory acceptability, and/or subject safety. Therefore, adherence to the criteria as specified in the Protocol is essential.

#### 3.1. Subject Inclusion Criteria

A subject who meets all of the following criteria may be included in the study:

1. Men and women, aged 18 or older.
2. Histologically or cytologically confirmed advanced/metastatic or surgically unresectable cholangiocarcinoma. Subjects will be assigned to 1 of 3 cohorts:
  - a. Cohort A: FGFR2 translocations with a documented fusion partner in central laboratory report
  - b. Cohort B: other FGF/FGFR alterations.
  - c. Cohort C (US only): negative for FGF/FGFR alterations.
3. Radiographically measurable disease per RECIST v1.1.
4. Documentation of FGF/FGFR gene alteration status [REDACTED]
5. Documented disease progression after at least 1 line of prior systemic therapy.
6. Archival tumor specimen (formalin fixed paraffin-embedded [FFPE] tumor block or approximately 15 slides) or willingness to undergo a pretreatment tumor biopsy to provide a tumor block or unstained slides. Archival tumor biopsies are acceptable and should be no more than 2 years old (preferably < 1 year old and, if possible, collected since the completion of the last treatment); subjects with a sequencing report from the central genomic laboratory within approximately 2 years of screening are exempt from the need for tumor biopsy, but a tumor sample should be provided to the sponsor if available.
7. Life expectancy  $\geq$  12 weeks.
8. ECOG performance status 0 to 2 (see [Table 8](#)).
9. Willingness to avoid pregnancy or fathering children based on the criteria below:
  - a. Woman of nonchildbearing potential (ie, surgically sterile with a hysterectomy and/or bilateral oophorectomy OR  $\geq$  12 months of amenorrhea).
  - b. Woman of childbearing potential who has a negative pregnancy test at screening and before the first dose on Day 1 and who agrees to take appropriate precautions to avoid pregnancy (with at least 99% certainty) from screening through safety follow-up. Permitted methods that are at least 99% effective in preventing pregnancy (see [Appendix A](#)) should be communicated to the subject and their understanding confirmed. A follow-up pregnancy test will be performed at EOT visit.
  - c. Man who agrees to take appropriate precautions to avoid fathering children (with at least 99% certainty) from screening through 90 days after last day of treatment (1 sperm cycle). Permitted methods that are at least 99% effective in preventing pregnancy (see [Appendix A](#)) should be communicated to the subject and their understanding confirmed.

### 3.2. Subject Exclusion Criteria

A subject who meets any of the following criteria will be excluded from the study:

1. Prior receipt of selective FGFR inhibitor.
2. Treatment with other investigational study drug for any indication for any reason, or receipt of anticancer medications within 28 days before first dose of study drug. Subjects must have recovered (Grade  $\leq 1$  or at pretreatment baseline) from AEs from previously administered therapies.
3. Untreated brain or central nervous system (CNS) metastases or brain/CNS metastases that have progressed (eg, evidence of new or enlarging brain metastasis or new neurological symptoms attributable to brain/CNS metastases). Subjects with previously treated and clinically stable brain/CNS metastases and who are off all corticosteroids for  $\geq 4$  weeks are eligible.
4. Have a known additional malignancy that is progressing or requires active treatment. Exceptions include basal cell carcinoma of the skin, squamous cell carcinoma of the skin, carcinoma *in situ* of the cervix, or other noninvasive or indolent malignancy that has undergone potentially curative therapy.
5. Are pregnant or lactating.
6. Have abnormal laboratory parameters:
  - a. Total bilirubin  $\geq 1.5 \times$  upper limit of normal (ULN;  $\geq 2.5 \times$  ULN if Gilbert syndrome or disease involving liver).
  - b. AST and ALT  $> 2.5 \times$  ULN (AST and ALT  $> 5 \times$  ULN in the presence of liver metastases).
  - c. Creatinine clearance  $\leq 30$  mL/min based on Cockcroft-Gault.
  - d. Serum phosphate  $>$  institutional ULN.
  - e. Serum calcium outside of the institutional normal range or serum albumin-correct calcium outside of the institutional normal range when serum albumin is outside of the institutional normal range.
  - f. Potassium levels  $<$  institutional lower limit of normal; supplementation can be used to correct potassium level during the screening.
7. Known history of human immunodeficiency virus (HIV) infection or positivity on immunoassay confirmed per local standards (NOTE: HIV screening test is optional for US subjects, but subjects with known history of HIV infection will be excluded).
8. Evidence of active hepatitis B virus (HBV) or hepatitis C virus (HCV) infection.
9. Has a history or presence of an abnormal ECG that in the investigator's opinion is clinically meaningful. Subjects with a screening QTcF interval  $> 450$  milliseconds are excluded.
10. History of clinically significant or uncontrolled cardiac disease including unstable angina, acute myocardial infarction, New York Heart Association Class III or IV congestive heart failure, or arrhythmia requiring therapy. Subjects with a pacemaker and well-controlled rhythm for at least 1 month prior to first dose will be allowed.

11. Have undergone major surgical procedure other than for diagnosis within 28 days before Cycle 1 Day 1.
12. Inadequate recovery from toxicity and/or complications from a major surgery before starting therapy.
13. Pregnant or nursing women or subjects expecting to conceive or father children within the projected duration of the study, starting with the screening visit through completion of safety follow-up visit (90 days from date of last dose for male subjects).
14. Concurrent anticancer therapy (eg, chemotherapy, radiation therapy, surgery, immunotherapy, biologic therapy, hormonal therapy, investigational therapy, or tumor embolization).
15. Received prior radiation therapy administered within 4 weeks of first dose of study drug. Subjects must have recovered from all radiation-related toxicities, not require corticosteroids, and not have had radiation pneumonitis. A 2-week washout is permitted for palliative radiation to non-CNS disease.
16. History and/or current evidence of ectopic mineralization/calcification, including but not limited to soft tissue, kidneys, intestine, myocardia, or lung, excepting calcified lymph nodes and asymptomatic arterial or cartilage/tendon calcification.
17. Current evidence of clinically significant corneal or retinal disorder confirmed by ophthalmologic examination.
18. Current use of prohibited medication as described in Section 5.7.2.
19. Use of any potent CYP3A4 inhibitors or inducers ([Appendix B](#)) within 14 days or 5 half-lives (whichever is shorter) before the first dose of study drug. Topical ketoconazole will be allowed.
20. Known hypersensitivity or severe reaction to INCB054828 or excipients of INCB054828 study drug (refer to the [IB](#)).
21. Inability or unlikeliness to comply with the dose schedule and study evaluations, in the opinion of the investigator.
22. Inability to comprehend or unwilling to sign the informed consent form (ICF).
23. Unable or unwilling to swallow INCB054828 or significant GI disorder(s) that could interfere with the absorption, metabolism, or excretion.
24. Any condition that would in the investigator's judgment interfere with full participation in the study, including administration of study medication and attending required study visits; pose a significant risk to the subject; or interfere with interpretation of study data.
25. Subjects with history of hypovitaminosis D requiring supraphysiologic doses to replenish the deficiency. Subjects receiving vitamin D food supplements are allowed.



## 4. INVESTIGATIONAL PLAN

### 4.1. Overall Study Design

This is an open-label, monotherapy study of INCB054828 in subjects with advanced/metastatic or surgically unresectable cholangiocarcinoma with FGFR2 translocations, with other FGF/FGFR alterations, or who are negative for FGF/FGFR alterations. The study will enroll approximately 140 subjects total: 100 subjects with FGFR2 translocations (Cohort A), 20 subjects with other FGF/FGFR alterations (Cohort B), and 20 subjects with no FGF/FGFR alterations (Cohort C [US only]).

Subjects will receive a once daily dose (QD) of INCB054828 at 13.5 mg on a 2-week-on therapy and 1-week-off therapy schedule. Full study drug administration information can be found in Section 5.2.

Subject eligibility can be based on local genomic testing results, if available. Confirmatory testing through the central genomics laboratory will be performed on all subjects.

Previous therapies may include chemotherapeutic agents, immunotherapies, with or without radiotherapy. Subjects receiving radiotherapy to target lesion(s) must show progression of target lesion before entry into the study.

Genomic testing results will allow subjects to be assigned to a cohort:

- Cohort A: FGFR2 translocations with a documented fusion partner in central laboratory report
- Cohort B: other FGF/FGFR alterations
- Cohort C (US only): negative for FGF/FGFR alterations

Subjects enrolled based on a local sequencing report will be assigned to a cohort based on the local results. However, final cohort assignment for statistical analysis of primary and secondary endpoints will be done based on the central genomics testing results.

Treatment will start on Cycle 1 Day 1. Subjects will undergo regular safety assessments during treatment as well as regular efficacy assessments. Subjects will be allowed to continue administration in 21-day cycles until documented disease progression or unacceptable toxicity is reported. See Figure 3 for the study design.

**Figure 3: Study Design**

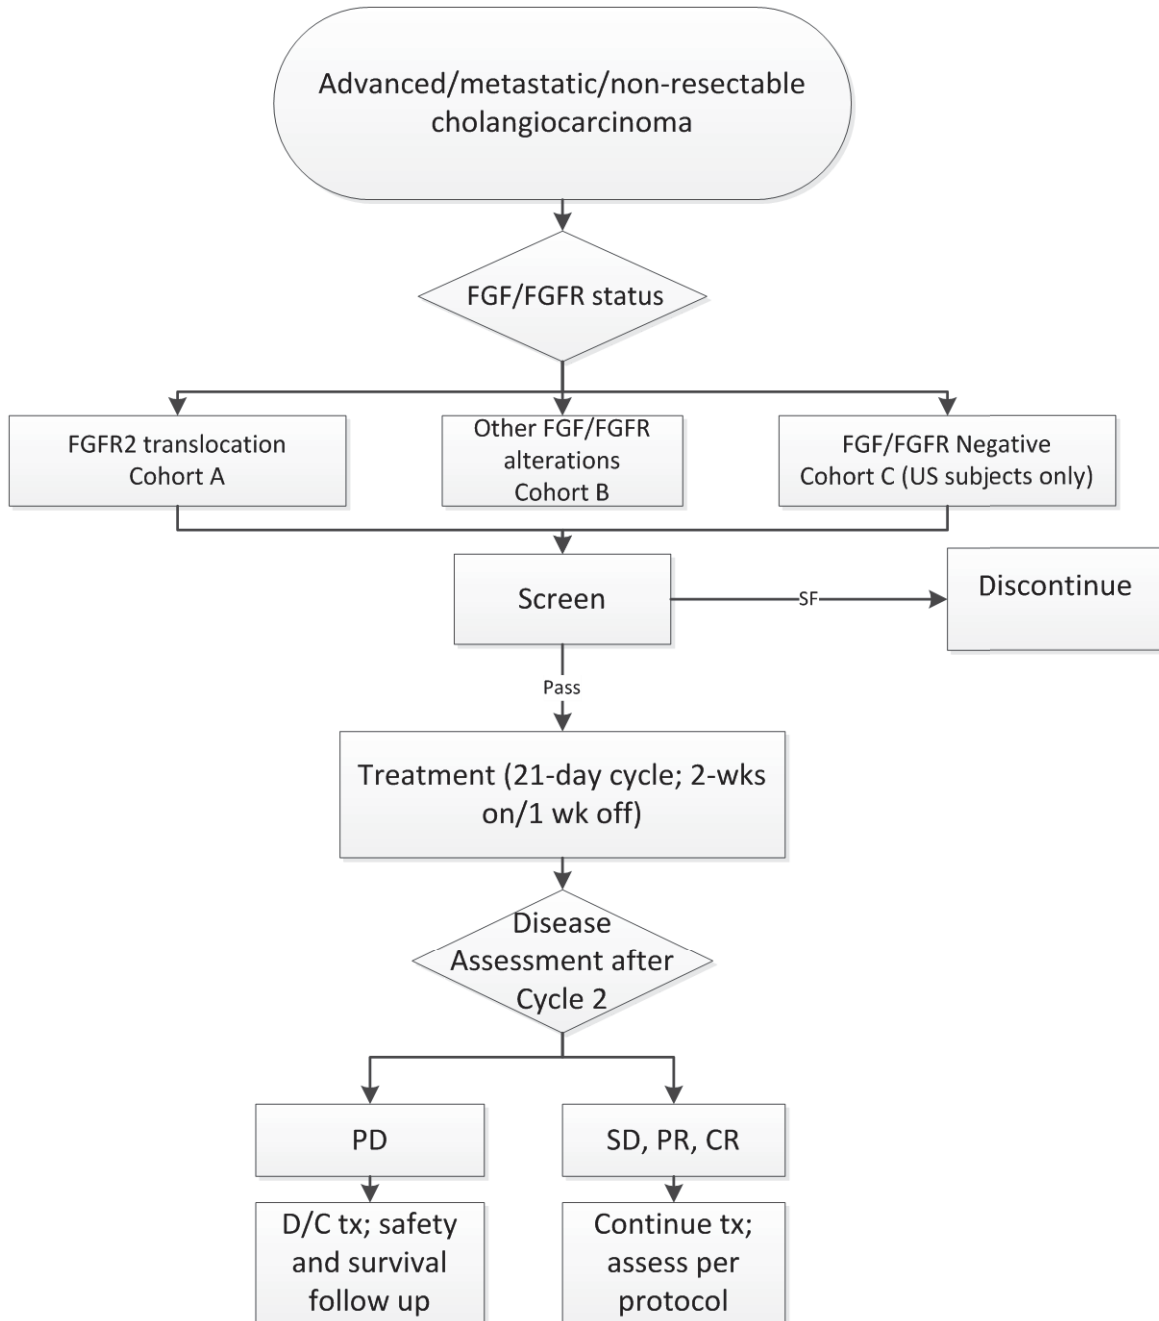

D/C = discontinue; SF = screen fail.

#### 4.2. Measures Taken to Avoid Bias

This is an open-label study; no comparisons will be made between subjects or against historical controls. Measurements of safety and efficacy are objective measurements, and only comparisons to pretreatment conditions will be made.

### **4.3. Number of Subjects**

#### **4.3.1. Planned Number of Subjects**

Approximately 140 subjects (total) are planned for enrollment. This may vary due to outcome of fertility analysis.

#### **4.3.2. Replacement of Subjects**

Not applicable.

### **4.4. Duration of Treatment and Subject Participation**

After signing the ICF, screening assessments may be completed over a period of up to 28 days. Each subject enrolled in the study may continue to receive study treatment in continuous 21-day cycles. At the point when the subject discontinues study drug (INCB054828), the treatment period will end and the subject will enter the follow-up period (see Section 6.4). Study participation is expected to average approximately 6 months per individual subject.

### **4.5. Overall Study Duration**

The study begins when the first subject signs the ICF. The end of the study will occur when all subjects have discontinued study drug and have completed applicable follow-up assessments.

If there have been  $\leq 2$  subjects on study for more than 8 months, then a database lock of the study may occur to allow the analysis of the study data. Any remaining subjects may continue to receive study treatment per Protocol. The remaining subjects are considered to be on study until a discontinuation criterion is met and written notification is provided to the sponsor.

### **4.6. Study Termination**

The investigator retains the right to terminate study participation at any time, according to the terms specified in the study contract. The investigator is to notify the institutional review board (IRB)/independent ethics committee (IEC) in writing of the study's completion or early termination, send a copy of the notification to the sponsor or sponsor's designee, and retain 1 copy for the site study regulatory file.

The sponsor may terminate the study electively, if required by regulatory decision, or upon advice of the study committee. If the study is terminated prematurely, the sponsor will notify the investigators, the IRBs and IECs, and regulatory bodies of the decision and reason for termination of the study.

## **5. TREATMENT**

### **5.1. Treatment Assignment**

#### **5.1.1. Subject Numbering and Treatment Assignment**

The interactive response technology (IRT) will be contacted at the beginning of screening to obtain a subject number. All subject numbers will be 6 digits; the first 3 digits will be the site number, and the last 3 digits will be the subject's number. This subject number will be maintained throughout the study and will not be reassigned. Subjects who withdraw consent or discontinue from the study after being assigned a subject number will retain their initial number.

Site staff will contact the IRT after screening is completed to enroll the subject and to allocate the subject to treatment assignment and obtain the initial study drug assignment. The investigator or designee will select the appropriate number of bottles of study drug from their stock that correspond to the dose provided by the IRT and dispense the study drug to the subject. All subsequent dispensing of study drug should follow this process. Refer to the IRT manual for detailed information.

If a subject is mistakenly given a bottle of study drug that is not the bottle assigned by the IRT, the IRT help desk must be notified immediately. The reason for the misallocation of the study drug must be documented by the study site and reported to the IRB/IEC.

For subjects who signed an ICF but are not allocated and for subjects who are allocated but were not treated, refer to the electronic case report form (eCRF) Completion Guidelines for instruction on which eCRFs to complete.

All subjects will receive the same treatment assignment (13.5 mg QD) regardless of cohort assignment.

#### **5.1.2. Randomization and Blinding**

Not applicable, since this is an open-label, single-group study.

### **5.2. Study Drug**

#### **5.2.1. INCB054828**

##### **5.2.1.1. Description and Administration**

INCB054828 will be self-administered as a QD oral treatment on a 21-day cycle. Subjects will take study drug for 2 weeks continuously (14 days) followed by a 1-week (7 days) break. The starting dose will be 13.5 mg. Each dose of study drug should be taken immediately upon rising or after a 2-hour fast. Subject should plan to fast for 1 additional hour after taking study drug.

##### **5.2.1.2. Supply, Packaging, and Labeling**

Study drug will be supplied as 2 mg and 4.5 mg tablets. All tablet excipients comply with the requirements of the applicable compendial monographs (Ph Eur, USP-NF; refer to the [IB](#)).

INCB054828 tablets will be packaged in high-density polyethylene bottles. No preparation is required.

All Incyte investigational product labels will be in the local language and will comply with the legal requirements of each country.

### **5.2.1.3. Storage**

Bottles of tablets should be stored at room temperature, 15°C to 30°C (59°F to 86°F).

### **5.2.1.4. Instruction to Subjects for Handling Study Drug (INCB054828)**

The subject must be instructed in the handling of study drug as follows:

- To store the study drug at room temperature.
- To only remove from the study drug bottle the number of tablets needed at the time of administration.
- Not to remove doses in advance of the next scheduled administration.
- Tablets cannot be split or crushed
- To make every effort to take doses on schedule.
- To report any missed doses.
- To take study drug immediately upon rising or after a 2-hour fast with a glass of water; the subject should refrain from eating 1 hour after taking study drug.
- If the subject vomits after taking study drug, the subject should not take another dose that day.
- To keep study drug in a safe place and out of reach of children.
- To bring all used and unused study drug kits to the site at each visit.
- If a dose of INCB054828 is missed by more than 4 hours, that dose should be skipped and the next scheduled dose should be administered at the usual time.

## **5.3. Treatment Compliance**

Compliance with all study-related treatments should be emphasized to the subject by the site personnel, and appropriate steps should be taken to optimize compliance during the study. Compliance with INCB054828 will be calculated by the sponsor based on the drug accountability documented by the site staff and monitored by the sponsor/designee (tablet counts). Subjects will be instructed to bring the study drug with them to the study visits in order for site personnel to conduct tablet counts to assess study drug accountability. The drug accountability documentation will be used by the sponsor to calculate treatment compliance.

## 5.4. Treatment Interruptions and Adjustments

### 5.4.1. Dose Modifications

Dose interruptions and modifications may occur for individual study subjects. The occurrence of toxicities (related or unrelated to study drug) will guide decisions for treatment interruptions and discontinuation for individual subjects.

### 5.4.2. Criteria and Procedures for Dose Interruptions and Adjustments of Study Drug

Treatment with INCB054828 may be delayed up to 14 days to allow for resolution of toxicity. Subjects may resume treatment if no medical condition or other circumstance exists that, in the opinion of the investigator, would make the subject unsuitable for further participation in the study. The treating investigator should contact the sponsor to discuss the case of any subject whose treatment has been delayed for more than 14 days before restarting treatment with INCB054828.

**Table 3: Guidelines for Interruption and Restarting of Study Drug**

| ADVERSE EVENT                                                                                                                                                                                                                                                       | ACTION TAKEN                                                                                                                                                                                                                                                                                                                                    |
|---------------------------------------------------------------------------------------------------------------------------------------------------------------------------------------------------------------------------------------------------------------------|-------------------------------------------------------------------------------------------------------------------------------------------------------------------------------------------------------------------------------------------------------------------------------------------------------------------------------------------------|
| <b>Chemistry</b>                                                                                                                                                                                                                                                    |                                                                                                                                                                                                                                                                                                                                                 |
| <ul style="list-style-type: none"> <li>• AST and/or ALT is <math>&gt; 5.0 \times \text{ULN}</math>.</li> </ul> Note: In subjects with liver metastasis-related elevations at baseline, contact sponsor to discuss clinical management and possible dose reductions. | <p><b>Step 1:</b> Interrupt study drug up to 2 weeks (14 days) until the toxicity has resolved to <math>\leq</math> Grade 1 except by approval of the medical monitor.</p> <p><b>Step 2:</b> Restart study drug at same dose. If assessed as related to study drug, restart study drug at next lower dose; monitor as clinically indicated.</p> |
| <b>Other toxicities</b>                                                                                                                                                                                                                                             |                                                                                                                                                                                                                                                                                                                                                 |
| <ul style="list-style-type: none"> <li>• Any Grade 1 or Grade 2 toxicity.</li> </ul>                                                                                                                                                                                | Continue study drug treatment and treat the toxicity; monitor as clinically indicated.                                                                                                                                                                                                                                                          |
| <ul style="list-style-type: none"> <li>• Any Grade 3 toxicity, if clinically significant and not manageable by supportive care.</li> </ul>                                                                                                                          | <p><b>Step 1:</b> Interrupt study drug up to 2 weeks (14 days), until toxicity resolves to <math>\leq</math> Grade 1.</p> <p><b>Step 2:</b> Restart study drug at same dose. If assessed as related to study drug, restart study drug at next lower dose; monitor as clinically indicated.</p>                                                  |
| <ul style="list-style-type: none"> <li>• Any recurrent Grade 3 toxicity after 2 dose reductions.</li> </ul>                                                                                                                                                         | Discontinue study drug administration and follow-up per Protocol. (Exceptions require approval of sponsor.)                                                                                                                                                                                                                                     |
| <ul style="list-style-type: none"> <li>• Any other Grade 4 toxicity.</li> </ul>                                                                                                                                                                                     | Discontinue study drug administration and follow-up per Protocol.                                                                                                                                                                                                                                                                               |

Due to the fact subjects may enter the study with extensive pretreatment toxicities, the dose reduction rules are provided as guidelines (see [Table 3](#)).

For dose adjustments, the sponsor recommends a maximum of 2 dose level reductions: subjects administered 13.5 mg can decrease to 9 mg, and if additional dose reduction is required, subjects can decrease to 6 mg. Dose reductions below 6 mg are not allowed. The frequency of

administration remains the same (once daily) and as well as the schedule (2 weeks on treatment followed by 1 week off treatment).

Adverse events that have a clear alternative explanation or transient ( $\leq 72$  hours) abnormal laboratory values without associated clinically significant signs or symptoms may be exempt from dose-reduction rules.

### 5.4.3. Management of Hyperphosphatemia

Hyperphosphatemia is an expected on-target pharmacologic effect of FGFR inhibition. Hyperphosphatemia should be managed with diet modifications, phosphate binders and diuretics, or a dose reduction per the recommendations in Table 4.

**Table 4: Recommended Approach for Hyperphosphatemia Management**

| Serum Phosphate Level          | Supportive Care                                                                                                                                                                                                                                                                                        | Guidance for Interruption/Discontinuation of INCB054828                                                                                                                                                                                                                                                           | Guidance for Restarting INCB054828                                                                                                                |
|--------------------------------|--------------------------------------------------------------------------------------------------------------------------------------------------------------------------------------------------------------------------------------------------------------------------------------------------------|-------------------------------------------------------------------------------------------------------------------------------------------------------------------------------------------------------------------------------------------------------------------------------------------------------------------|---------------------------------------------------------------------------------------------------------------------------------------------------|
| > 5.5 mg/dL and $\leq 7$ mg/dL | Initiate a low-phosphate diet                                                                                                                                                                                                                                                                          | No action.                                                                                                                                                                                                                                                                                                        | Not applicable.                                                                                                                                   |
| > 7 mg/dL and $\leq 10$ mg/dL  | Initiate/continue a low-phosphate diet and initiate phosphate-binding therapy once serum phosphate level is > 7 mg/dL. Monitor serum phosphate at least twice a week and adjust the dose of binders as needed; continue to monitor serum phosphate at least twice a week until return to normal range. | If serum phosphate level continues to be > 7 mg/dL and $\leq 10$ mg/dL with concomitant phosphate-binding therapy for 2 weeks, or if there is recurrence of serum phosphate level in this range, <i>interrupt</i> INCB054828 for up to 2 weeks (not including the planned dose interruption per treatment cycle). | Restart at the same dose when serum phosphate is < 7 mg/dL. If serum phosphate level recurs at > 7 mg/dL, restart study drug with dose reduction. |
| > 10 mg/dL                     | Continue to maintain a low-phosphate diet, adjust phosphate-binding therapy, and start/continue phosphaturic agent. Continue to monitor serum phosphate at least twice a week until return to normal range.                                                                                            | If serum phosphate level is > 10 mg/dL for 1 week following phosphate-binding therapy and low phosphate diet, <i>interrupt</i> study drug. If there is recurrence of serum phosphate level in this range following 2 dose reductions, <i>permanently discontinue</i> INCB054828.                                  | Restart study drug at reduced dose with phosphate binders when serum phosphate is < 7 mg/dL.                                                      |

### 5.4.4. Criteria for Permanent Discontinuation of Study Drug

The occurrence of unacceptable toxicity not caused by the underlying malignancy will be presumed to be related to study drug treatment and will require that the study drug be permanently discontinued. Unacceptable toxicity is defined as follows:

- Occurrence of an AE that is related to treatment with the study drug that, in the judgment of the investigator or the sponsor's medical monitor, compromises the subject's ability to continue study-specific procedures or is considered to not be in the subject's best interest.
- An AE requiring more than 2 dose reductions.

- Persistent AE requiring a delay of therapy for more than 21 days unless a greater delay has been approved by the sponsor.
- Increase in QT/QTc to > 500 milliseconds or to > 60 milliseconds over baseline. In case of a QTc > 500 milliseconds, the subject must be hospitalized and a continuous ECG monitoring must be set up until the measure of the QTc interval decreases below 500 milliseconds and until acceptable in the opinion of a local cardiologist.

## **5.5. Withdrawal of Subjects From Study Treatment**

### **5.5.1. Withdrawal Criteria**

Subjects **must** be withdrawn from study treatment for the following reasons:

- The subject becomes pregnant.
- Consent is withdrawn. Note Subjects may choose to discontinue study treatment and remain in the study to be followed for progression and survival.
- Further treatment would be injurious to the subject's health or well-being, in the investigator's medical judgment. Subject would still be followed for progression and survival.
- The study is terminated by the sponsor.
- The study is terminated by the local health authority, IRB, or IEC.
- Unacceptable toxicity has occurred.
- Disease progression has been reported.
- Other antineoplastic treatment is initiated.

A subject **may** be discontinued from study treatment as follows:

- If, during the course of the study, a subject is found not to have met eligibility criteria but is receiving clinical benefit as per the investigator, the medical monitor, in collaboration with the investigator, will determine whether the subject should be withdrawn from the study. This includes cases where the local genomic testing result is positive for an FGF/FGFR alteration but the central genomic testing is not.
- If a subject is noncompliant with study procedures or study drug administration in the investigator's opinion, the sponsor should be consulted for instruction on handling the subject.

### **5.5.2. Withdrawal Procedures**

In the event that the decision is made to permanently discontinue the study drug, the subject will be withdrawn from the study and the end-of-treatment visit should be conducted. Reasonable efforts should be made to have the subject return for a follow-up visit. These visits are described in Section 6. The last date of the last dose of study drug and the reason for subject withdrawal will be recorded in the eCRF.



## 5.6. Withdrawal of Subjects From Study

If the subject discontinues study treatment and actively withdraws consent for collection of follow-up data (safety follow-up or disease assessment), then no additional data collection should occur; however, subjects will have the option of withdrawing consent for study treatment but continuing in the follow-up period of the study for safety/efficacy assessments.

## 5.7. Concomitant Medications

### 5.7.1. Restricted Medications

The use of mild or moderate CYP3A4 inhibitors or inducers should involve careful monitoring. The pH level of stomach acid affects the absorption of INCB054828. As a result, *limited use* of proton pump inhibitors or antacids while on study is recommended. Calcium-based phosphate binding medications should not be used due to a concern for soft tissue mineralization.

### 5.7.2. Prohibited Medications

The following medications and measures are prohibited:

- The concomitant administration of potent CYP3A4 inhibitors and inducers. Based on the low overall bioavailability of topical ketoconazole, there are no restrictions on topical ketoconazole. See [Appendix B](#) for a list of potent CYP3A4 inhibitors and inducers.
- Any concomitant use of a selective FGFR inhibitor (other than the study drug)
- Investigational study drug for any indication.
- Use of any anticancer medications other than the study medication.

## 6. STUDY ASSESSMENTS

All study assessments will be performed as indicated in the schedule of assessments ([Table 5](#)), and all laboratory assessments will be performed as indicated in [Table 6](#).

[Table 7](#) presents a summary of clinical laboratory analytes to be assessed. The order of assessments is suggested by the order of mention within the schedule. See [Section 7](#) for instructions on each assessment. Further details of study procedures and assessments can be found in the study reference manual.

**Table 5: Study Assessments**

| Procedure                                       | Protocol Section | Pre-screening | Screening               | Treatment |                        |                         |                                 | EOT | Follow-Up                       |                                    |                               | Notes                                                                                                                          |
|-------------------------------------------------|------------------|---------------|-------------------------|-----------|------------------------|-------------------------|---------------------------------|-----|---------------------------------|------------------------------------|-------------------------------|--------------------------------------------------------------------------------------------------------------------------------|
|                                                 |                  |               |                         | Cycle 1   |                        | Cycle 2+                |                                 |     | Safety<br>EOT + 30<br>(+5) days | Disease Status<br>Every<br>9 weeks | Survival<br>Every<br>12 weeks |                                                                                                                                |
|                                                 |                  |               |                         | Day 1     | Day 8<br>(± 3<br>days) | Day 15<br>(± 3<br>days) | Day 1<br>Day 1<br>(± 3<br>days) |     |                                 |                                    |                               |                                                                                                                                |
| Genomic testing                                 | 7.1              | X             | Days<br>-28 to -1<br>X* |           |                        |                         |                                 |     |                                 |                                    |                               | * May be done during<br>prescreening or during<br>screening.                                                                   |
| Informed consent                                | 7.1              | X             | X                       |           |                        |                         |                                 |     |                                 |                                    |                               |                                                                                                                                |
| Eye examination                                 | 7.5.5            |               | X                       |           |                        |                         | X*                              |     |                                 |                                    |                               | * Eye examination to be<br>performed every 3 cycles<br>(± 14 days) starting with<br>Cycle 3 and/or as<br>clinically indicated. |
| Review inclusion<br>and exclusion<br>criteria   | 3                |               | X                       | X         |                        |                         |                                 |     |                                 |                                    |                               |                                                                                                                                |
| Demography and<br>medical history               | 7.3              |               | X                       |           |                        |                         |                                 |     |                                 |                                    |                               |                                                                                                                                |
| Prior/concomitant<br>medications                | 7.4              |               | X                       | X         | X                      | X                       | X                               | X   | X                               |                                    |                               |                                                                                                                                |
| Physical<br>examination/ body<br>weight, height | 7.5.2            |               | X*                      | X         | X                      | X                       | X                               | X   | X                               |                                    |                               | * Comprehensive<br>examination at screening,<br>targeted physical<br>examination thereafter.                                   |
| Vital signs                                     | 7.5.3            |               | X                       | X         | X                      | X                       | X                               | X   | X                               |                                    |                               |                                                                                                                                |
| 12-lead ECG                                     | 7.5.4            |               | X                       | X         | X                      | X                       | X                               | X   | X                               |                                    |                               |                                                                                                                                |
| ECOG status                                     | 7.6.2            |               | X                       | X         | X                      | X                       | X                               | X   | X                               |                                    |                               |                                                                                                                                |

**Table 5: Study Assessments (Continued)**

| Procedure       | Protocol Section | Pre-Screening | Screening | Treatment |                        |                         |                                 | EOT | Follow-Up                       |                                    |                                                                                                                                                                                | Notes                                                                                                                         |
|-----------------|------------------|---------------|-----------|-----------|------------------------|-------------------------|---------------------------------|-----|---------------------------------|------------------------------------|--------------------------------------------------------------------------------------------------------------------------------------------------------------------------------|-------------------------------------------------------------------------------------------------------------------------------|
|                 |                  |               |           | Cycle 1   |                        | Cycle 2+                |                                 |     | Safety<br>EOT + 30<br>(+5) days | Disease Status<br>Every<br>9 weeks | Survival<br>Every<br>12 weeks                                                                                                                                                  |                                                                                                                               |
|                 |                  |               |           | Day 1     | Day 8<br>(± 3<br>days) | Day 15<br>(± 3<br>days) | Day 1<br>Day 1<br>(± 3<br>days) |     |                                 |                                    |                                                                                                                                                                                |                                                                                                                               |
| CT or MRI       | 7.6.1            |               | X         |           |                        | X*                      | X                               |     | X**                             |                                    | * Every 2 cycles through Cycle 4; every 3 cycles thereafter starting with Cycle 7.<br>** Subjects who discontinue study treatment for a reason other than disease progression. |                                                                                                                               |
| Review AEs      | 7.5.1            |               | X         |           |                        | X                       | X                               |     | X                               |                                    |                                                                                                                                                                                |                                                                                                                               |
| Survival status | 7.8.2            |               |           |           |                        |                         |                                 |     |                                 |                                    | X*                                                                                                                                                                             | * Once a subject has received the last dose of study drug, confirmed disease progression, or starts a new anticancer therapy. |

CT = computed tomography; MRI = magnetic resonance imaging.

**Table 6: Laboratory Assessments**

|                           | Protocol Section | Prescreening | Screening | Treatment |                    |                     |           |     | EOT | Follow-Up                                                                                                                                                     | Notes                                               |
|---------------------------|------------------|--------------|-----------|-----------|--------------------|---------------------|-----------|-----|-----|---------------------------------------------------------------------------------------------------------------------------------------------------------------|-----------------------------------------------------|
|                           |                  |              |           | Cycle 1   |                    |                     | Cycles 2+ | EOT |     |                                                                                                                                                               |                                                     |
|                           |                  |              |           | Day 1     | Day 8<br>(±3 Days) | Day 15<br>(±3 Days) |           |     |     |                                                                                                                                                               |                                                     |
| Serum chemistries         | 7.5.6            |              | X         | X*        | X                  | X                   | X         |     | X   | X                                                                                                                                                             | * May be performed within 3 days of the first dose. |
| Hematology                | 7.5.6            |              | X         | X*        | X                  | X                   | X         | X   | X   | * May be performed within 3 days of the first dose.                                                                                                           |                                                     |
| Lipid panel               | 7.5.6            |              |           | X         |                    |                     |           | X   |     |                                                                                                                                                               |                                                     |
| Endocrine                 | 7.5.6            |              | X         | X         |                    |                     | X         | X   |     |                                                                                                                                                               |                                                     |
| Coagulation panel         | 7.5.6            |              | X         |           |                    |                     | X*        | X   |     | * Only every 3 cycles starting at Cycle 3.                                                                                                                    |                                                     |
| Hepatitis screening       | 7.5.6.2          |              | X         |           |                    |                     |           |     |     |                                                                                                                                                               |                                                     |
| Urinalysis                | 7.5.6            |              | X         |           |                    |                     | X*        |     |     | * Only every 3 cycles starting at Cycle 3.                                                                                                                    |                                                     |
| Pregnancy test            | 7.5.6.1          |              | X*        | X**       |                    |                     | X**       | X** |     | * Serum<br>** Day 1 of each cycle; urine pregnancy test allowed.                                                                                              |                                                     |
| HIV testing               | 7.5.6.3          |              | X*        |           |                    |                     |           |     |     | * Optional for US subjects.                                                                                                                                   |                                                     |
| <b>Central laboratory</b> |                  |              |           |           |                    |                     |           |     |     |                                                                                                                                                               |                                                     |
| Blood sample for PK       | 7.7              |              |           |           | X*                 |                     |           |     |     | Samples will be drawn at predose, 1-2 hours postdose, and 4-12 hours postdose (3 samples total).<br>*Subject must fast 8 hours before first sample (predose). |                                                     |

**Table 7: Laboratory Tests: Required Analytes**

| Serum Chemistries                                                                                                                                                                                                                                                                                                                                                               | Hematology                                                                                                                                                                                                                                                                                                                                               | Urinalysis With Microscopic Examination                                                                                                                                                                                                                                                                                                                                                                           | Hepatitis Screening                                                                                                                                                                                          | Coagulation      |
|---------------------------------------------------------------------------------------------------------------------------------------------------------------------------------------------------------------------------------------------------------------------------------------------------------------------------------------------------------------------------------|----------------------------------------------------------------------------------------------------------------------------------------------------------------------------------------------------------------------------------------------------------------------------------------------------------------------------------------------------------|-------------------------------------------------------------------------------------------------------------------------------------------------------------------------------------------------------------------------------------------------------------------------------------------------------------------------------------------------------------------------------------------------------------------|--------------------------------------------------------------------------------------------------------------------------------------------------------------------------------------------------------------|------------------|
| Albumin<br>Alkaline phosphatase<br>ALT<br>AST<br>Bicarbonate<br>Blood urea nitrogen<br>Calcium<br>Chloride<br>Creatinine<br>Glucose<br>Lactate dehydrogenase<br>Phosphate<br>Potassium<br>Sodium<br>Total bilirubin<br>Direct bilirubin (if total bilirubin is elevated above ULN)<br>Total protein<br>Uric acid<br>Vitamin D (25-hydroxyvitamin D and 1,25-dihydroxyvitamin D) | Complete blood count, including:<br>Hemoglobin<br>Hematocrit<br>Platelet count<br>Red blood cell count<br>White blood cell count<br>Differential count, including:<br>Basophils<br>Eosinophils<br>Lymphocytes<br>Monocytes<br>Neutrophils<br>Absolute values must be provided for:<br>WBC differential laboratory results:<br>Lymphocytes<br>Neutrophils | Color and appearance<br>pH and specific gravity<br>Bilirubin<br>Glucose<br>Ketones<br>Leukocytes<br>Nitrite<br>Occult blood<br>Protein<br>Urobilinogen<br><b>Lipid Panel</b><br>Total cholesterol<br>Triglycerides<br>LDL<br>HDL                                                                                                                                                                                  | Hepatitis B surface antigen<br>Hepatitis B surface antigen antibody<br>Hepatitis B core antibody<br>HCV antibody<br>NOTE: If any of the above are positive, HBV-DNA, HCV-RNA to assess risk of reactivation. | PT<br>PTT<br>INR |
|                                                                                                                                                                                                                                                                                                                                                                                 |                                                                                                                                                                                                                                                                                                                                                          | <b>Other</b><br>Endocrine- parathyroid hormone<br>HIV testing (optional for US subjects)<br><b>Pregnancy Testing</b><br>Female subjects of childbearing potential only require a serum test at screening and a urine pregnancy test before the first dose on Day 1 of every cycle before dose administration and at EOT.<br>Pregnancy tests (serum or urine) should be repeated if required by local regulations. |                                                                                                                                                                                                              |                  |

HDL = high-density lipoprotein; INR = international normalized ratio; LDL = low-density lipoprotein; PT = prothrombin time; PTT = partial thromboplastin time; WBC = white blood cell.

Note: Additional tests may be required, as agreed by investigator and sponsor, based on emerging safety data.

## **6.1. Prescreening and Screening**

Prescreening is available for subjects without a genomic testing report (results within approximately 2 years of screening are valid for this study). Prescreening allows genomic testing to be performed outside of the 28-day screening window.

Screening is the interval between signing the ICF and the day that the subject is enrolled in the study (Cycle 1 Day 1). Screening may not exceed 28 days. Assessments that are required to demonstrate eligibility may be performed over the course of 1 or more days during the screening process.

Procedures conducted as part of the subject's routine clinical management (eg, blood count, imaging study) and obtained before signing of informed consent may be used for screening or baseline purposes provided that the procedure meets the Protocol-defined criteria and has been performed in the time frame of the study (ie, within 28 days of Cycle 1 Day 1). All information associated with eligibility requirements must be entered into the appropriate eCRF pages.

Results from the screening visit evaluations will be reviewed to confirm subject eligibility before enrollment or the administration of study drug. Tests with results that fail eligibility requirements may be repeated once during screening if the investigator believes the results to be in error. For screening assessments that are repeated, the most recent available result before treatment assignment will be used to determine subject eligibility. Treatment should start as soon as possible, but within 3 days after the date of enrollment. Additionally, a subject who fails screening may repeat the screening process 1 time if the investigator believes that there has been a change in eligibility status (eg, after recovery from an infection). Subjects who are rescreened will receive a new subject number through the IRT.

## **6.2. Treatment**

The treatment period begins on the day that the subject receives the first dose of study drug (Cycle 1 Day 1) through the point at which the investigator determines that the subject will be permanently discontinued from study drug. Cycle 1 Day 1 must be no more than 28 days after the subject has signed the ICF and no more than 3 days after the date of enrollment. Dates for subsequent study visits will be determined based on this day and should occur within 3 days (+/-) of the scheduled date unless delayed for safety reasons. At Cycle 1 Day 1, results from screening visit evaluations should be reviewed to determine whether the subject continues to meet the eligibility requirements, as specified in the Protocol.

## **6.3. End of Treatment**

When the subject permanently discontinues study drug, the EOT visit should be conducted. If the EOT visit coincides with a regular study visit, then the EOT evaluations will supersede those of that scheduled visit, and the data should be entered in the EOT visit in the eCRF. The subject should be encouraged to return for the follow-up visit.

## **6.4. Follow-Up**

### **6.4.1. Safety Follow-Up**

The safety follow-up period is the interval between the EOT visit and the scheduled follow-up visit, which should occur 30 to 35 days after the EOT visit (or after the last dose of study drug if the EOT visit was not performed). Adverse events and SAEs must be reported up until at least 30 days after the last dose of study drug, the date of the follow-up visit, or until toxicities resolve, return to baseline, or are deemed irreversible, whichever is longer. Reasonable efforts should be made to have the subject return for the follow-up visit and report any AEs that may occur during this period.

If a subject is scheduled to begin a new anticancer therapy before the end of the 30-day safety follow-up period, then the safety follow-up visit should be performed before new anticancer therapy is started. Once new anticancer therapy has been initiated, the subject will move into the survival follow-up period.

### **6.4.2. Disease Status Follow-Up**

Subjects who discontinue study treatment for a reason other than disease progression will move into the disease status follow-up period and should be assessed every 9 weeks by radiologic imaging to monitor disease status. Every effort should be made to collect information regarding disease status until:

- The start of new antineoplastic therapy.
- Disease progression.
- Death.
- The end of the study.

### **6.4.3. Survival Follow-Up**

Once a subject has received the last dose of study drug, confirmed disease progression, or starts a new anticancer therapy, the subject moves into the survival follow-up period and should be contacted by telephone, email, or visit at least every 12 weeks to assess for survival status until death, withdrawal of consent, or the end of the study, whichever occurs first.

## **6.5. End of Study**

The end of the study may be designated as the timepoint when all subjects have discontinued the study or the sponsor terminates the study.

## **6.6. Unscheduled Visits**

Unscheduled visits may occur at any time as medically warranted. Any assessments performed during those visits should be recorded in the eCRF.

## **7. CONDUCT OF STUDY ASSESSMENTS AND PROCEDURES**

### **7.1. Administration of Informed Consent Form**

A valid informed consent must be obtained from the study subject before any study-specific procedures are conducted using an ICF approved by the local IRB/IEC that contains all elements required by ICH E6 and describes the nature, scope, and possible consequences of the study in a form understandable to the study subject. Local and institutional guidelines for ICF content and administration must be followed; the original signed ICF must be retained by the investigator, and a copy of the signed ICF must be provided to the study subject. The informed consent process for each subject must be documented in writing within the subject source documentation.

### **7.2. Interactive Response Technology Procedure**

The IRT will be contacted to obtain a subject ID number when a subject enters screening. Upon determining that the subject is eligible for study entry, the IRT will be contacted to obtain the treatment assignment. Additionally, the IRT will be contacted at each regular study visit to update the study drug supply. See appropriate information in Section 5.1.1.

### **7.3. Demography and Medical History**

#### **7.3.1. Demographics and General Medical History**

Demographic data and general medical history will be collected at screening.

#### **7.3.2. Disease Characteristics and Treatment History**

A disease-targeted medical and medication history will be collected at screening.

### **7.4. Prior and Concomitant Medications and Procedures**

Prior and concomitant medications and procedures will be reviewed to determine subject eligibility. All concomitant medications and measures must be recorded in the eCRF, and any medication received or procedure performed within 28 days before first dose and up to the end of study will be recorded in the eCRF. The medication record will be maintained after signing the ICF to document concomitant medications, including any changes to the dose or regimen. Concomitant medications include any prescription, over-the-counter, or natural/herbal preparations taken or administered during the study period. Concomitant treatments and/or procedures that are required to manage a subject's medical condition during the study will also be recorded in the eCRF.

### **7.5. Safety Assessments**

#### **7.5.1. Adverse Events**

Adverse events will be monitored from the time the subject signs the ICF. Subjects will be instructed to report all AEs during the study and will be assessed for the occurrence of AEs throughout the study. In order to avoid bias in eliciting AEs, subjects will be asked general,



nonleading questions such as "How are you feeling?" All AEs (serious and nonserious) must be recorded on the source documents and eCRFs regardless of the assumption of a causal relationship with the study drug. The definition, reporting, and recording requirements for AEs are described in Section 8.

### **7.5.2. Physical Examinations**

Clinically notable abnormalities that are considered clinically significant in the judgment of the investigator are to be reported as AEs.

Physical examinations must be performed by a medically qualified individual such as a licensed physician, physician's assistant, or an advanced registered nurse practitioner, as local law permits.

Clinically notable abnormalities that are considered clinically significant in the judgement of the investigator are to be reported as AEs.

#### **7.5.2.1. Comprehensive Physical Examination**

The comprehensive physical examination will include height (at screening) and body weight and assessment(s) of the following organ or body systems: skin; head, eyes, ears, nose, and throat; thyroid; lungs; cardiovascular system; abdomen (liver, spleen); extremities; and lymph nodes, as well as a brief neurological examination.

#### **7.5.2.2. Targeted Physical Examination**

The targeted physical examination will be a symptom-directed evaluation. The targeted physical examination will include body weight and assessment(s) of the body systems or organs, as indicated by subject symptoms, AEs, or other findings.

### **7.5.3. Vital Signs**

Vital sign measurements include blood pressure, pulse, respiratory rate, and body temperature. Blood pressure and pulse will be taken with the subject in the recumbent, semirecumbent, or sitting position after approximately 5 minutes of rest. Clinically notable abnormalities that are considered clinically significant in the judgment of the investigator are to be reported as AEs.

### **7.5.4. Electrocardiograms**

All 12-lead ECGs will be performed with the subject in a recumbent or semirecumbent position after 5 minutes of rest.

The 12-lead ECGs will be interpreted by the investigator at the site to be used for immediate subject management. The decision to include or exclude a subject or withdraw a subject from the study based on an ECG flagged as "Abnormal, Clinically Significant" is the responsibility of the investigator, in consultation with the sponsor's medical monitor, as appropriate. Clinically notable abnormalities that are considered clinically significant in the judgment of the investigator are to be reported as AEs.

### **7.5.5. Comprehensive Eye Examination**

A comprehensive eye examination should be performed by a qualified ophthalmologist at screening, once every 3 cycles ( $\pm$  14 days), at EOT and as clinically indicated. The eye examination should include a visual acuity test, slit-lamp examination, and funduscopy with digital imaging. Additional assessments (eg, optical coherence tomography) should be done if clinically relevant retinal findings are observed on ophthalmologic examinations and in subjects with reported visual AEs or change in visual acuity, if the events or changes are suspected to be of retinal origin. Every effort should be made to ensure that all subsequent examinations are performed by the same ophthalmologist.

### **7.5.6. Laboratory Assessments**

Each site's local laboratory will be used for eligibility and ongoing safety assessments. Chemistry, hematology, coagulation panel, lipid panel, serology, endocrine function, and urinalysis will all be analyzed by each site's laboratory.

#### **7.5.6.1. Pregnancy Testing**

A serum pregnancy test will be required for all women of childbearing potential during screening. A urine pregnancy test is allowed on Day 1 (before the first dose of study drug), Day 1 of each subsequent cycle, and at the EOT visit. Urine pregnancy tests will be conducted as outlined in [Table 6](#), as medically indicated, or per country-specific requirement. Urine pregnancy tests will be performed locally. If a urine pregnancy test is positive, the results should be confirmed with a serum pregnancy test.

If the serum pregnancy test is negative after a urine test was positive, then the investigator will assess the potential benefit/risk to the subject and determine whether it is in the subject's best interest to resume study drug and continue participation in the study.

#### **7.5.6.2. Hepatitis Screening Tests**

Subjects will undergo screening for hepatitis B or C through their local laboratory. If the results are positive, then subjects will be required to undergo additional testing. Subjects with chronic or cleared hepatitis B or C will be allowed to enroll. Chronic is defined as subjects with no evidence of liver cirrhosis or active hepatitis (elevation of transaminases) but with positive anti-HCV antibody test or positive HCV RNA, positive HBV surface antigen, or positive HBV DNA.

#### **7.5.6.3. HIV Screening Tests**

Subjects outside of the US will be required to submit to an HIV test during screening to ensure negative HIV status before enrollment/Cycle 1 Day 1. This test is optional for US subjects.

#### **7.5.6.4. Evaluation of FGF and FGFR Genetic Alterations**

All potential subjects must be evaluated for FGF/FGFR alteration status before enrollment. Subject eligibility can be based on local genomic testing results, if available. Confirmatory testing through the central genomics laboratory will be performed on all subjects. [REDACTED]

[REDACTED]

## 7.6. Efficacy Assessments

### 7.6.1. Tumor Imaging

Objective assessment of tumor status is required using appropriate disease-specific techniques, and a central radiologic facility will be used to determine responses and will be logged in to the eCRF. RECIST v1.1 ([Eisenhauer et al 2009](#)) will be used, and the recommended method for measuring and following tumor burden will be CT scan, to include the thorax, abdomen, and pelvis; the neck can be included if needed. Alternative modalities (eg, MRI) may be substituted for a CT scan at the discretion of the investigator, provided that the same modality is used throughout the study and that the methodology is consistent with RECIST v1.1.

The schedule for efficacy assessments will be at screening (this will be considered the baseline scan), every 2 cycles (every 6 weeks) for the first 4 cycles, every 3 cycles (every 9 weeks) thereafter, and then at EOT (if applicable). For subjects who discontinue treatment for reasons other than disease progression, every effort should be made to continue monitoring their disease status by radiographic imaging until 1) start of new anticancer therapy, 2) documented disease progression, 3) death, or 4) end of study, whichever occurs first.

### 7.6.2. Eastern Cooperative Oncology Group Performance Status

Eastern Cooperative Oncology Group performance status ([Table 8](#)) will be assessed at the visits specified in the schedule of assessments ([Table 5](#)).

**Table 8: ECOG Performance Status**

| Grade | Performance Status                                                                                                                                       |
|-------|----------------------------------------------------------------------------------------------------------------------------------------------------------|
| 0     | Fully active, able to carry on all predisease performance without restriction.                                                                           |
| 1     | Restricted in physically strenuous activity but ambulatory and able to carry out work of a light or sedentary nature, eg, light house work, office work. |
| 2     | Ambulatory and capable of all self-care but unable to carry out any work activities. Up and about more than 50% of waking hours.                         |
| 3     | Capable of only limited self-care, confined to bed or chair more than 50% of waking hours.                                                               |
| 4     | Completely disabled. Cannot carry on any self-care. Totally confined to bed or chair.                                                                    |
| 5     | Dead.                                                                                                                                                    |

Source: [Oken et al 1982](#).

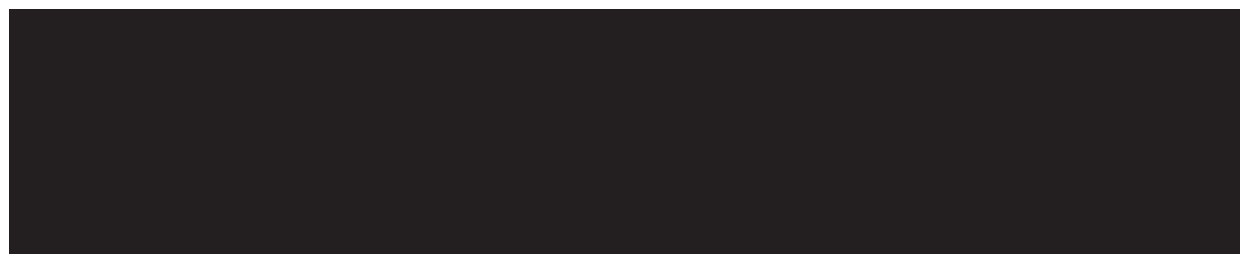

### 7.6.4. Survival Follow-Up

For subjects having entered the survival follow-up period of the study, the site will use continuing subject records to supply data on subsequent treatment regimens, tumor assessments

(if discontinued treatment for a reason other than progression), and OS in the eCRF. For subjects who do not intend to return to the study investigator for their ongoing care, follow-up should be maintained by phone contact, patient records, and public records/databases at intervals of no longer than 12 weeks. After the final primary analysis is performed, the follow-up interval for subsequent anticancer treatments and survival may be reduced to every 12 weeks (see Section 6.4).

## **7.7. Pharmacokinetic Assessments**

### **7.7.1. Blood Sample Collection**

Pharmacokinetic samples will be obtained on Cycle 1, Day 8 at predose, 1 to 2 hours postdose, and 4 to 12 hours postdose (3 samples total; Table 6). The exact date and time of the PK blood draws will be recorded in the eCRF along with the date and time of the last dose of study drug preceding the blood draw and the time of the most recent meal. Instructions for sample preparation and shipping to the central laboratory will be provided in the Laboratory Manual. The subject will receive a reminder card in advance of the study visit, providing instruction to hold the dose of study drug on the day of the visit, a place to record the time of the previous dose of study drug, and a place to record the time of the most recent meal or snack consumed.

On Cycle 1 Day 8, it is important to note that the subject must refrain from eating 8 hours prior to arriving at the site. The initial predose sample should be drawn approximately 1 hour before study drug administration. Subjects then need to fast for 1 additional hour after taking study medication. Once the subject takes the study drug, any subsequent timed samples will be taken.

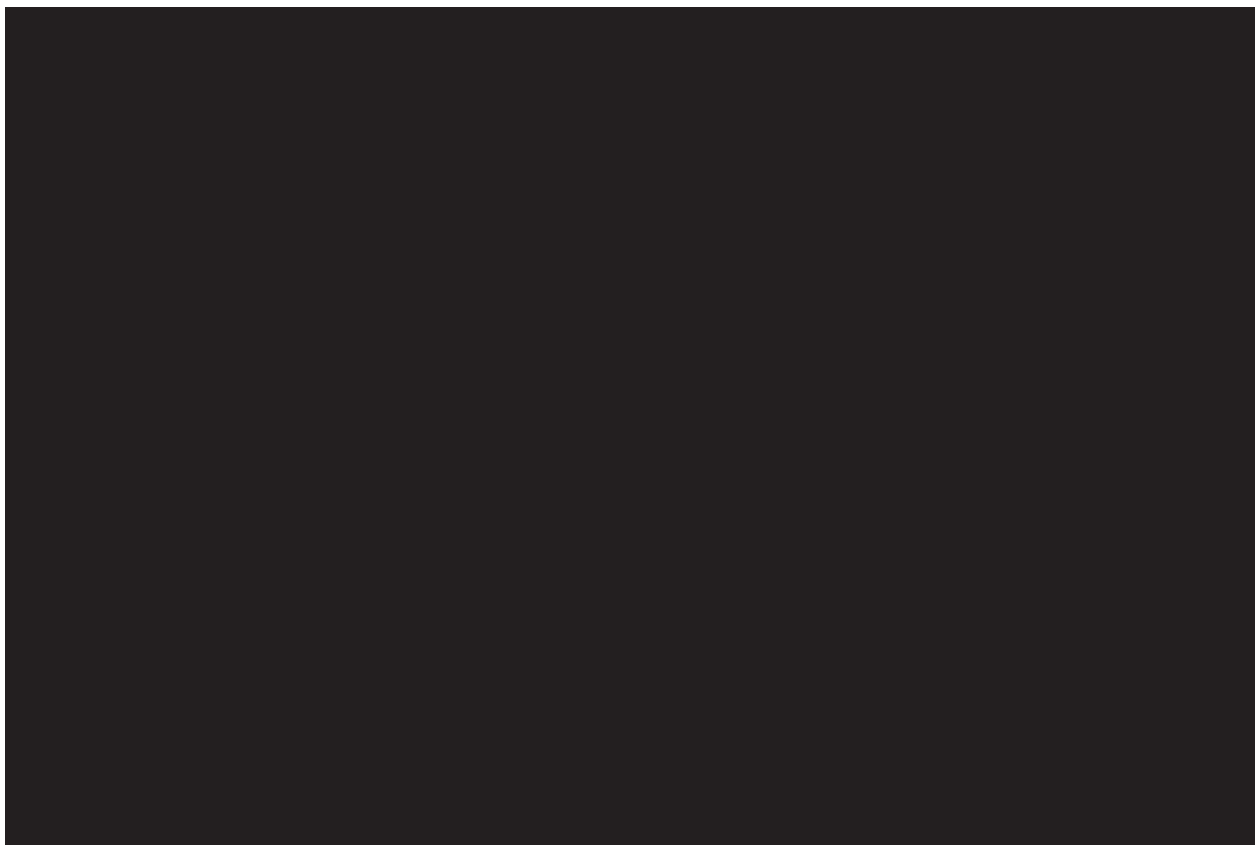

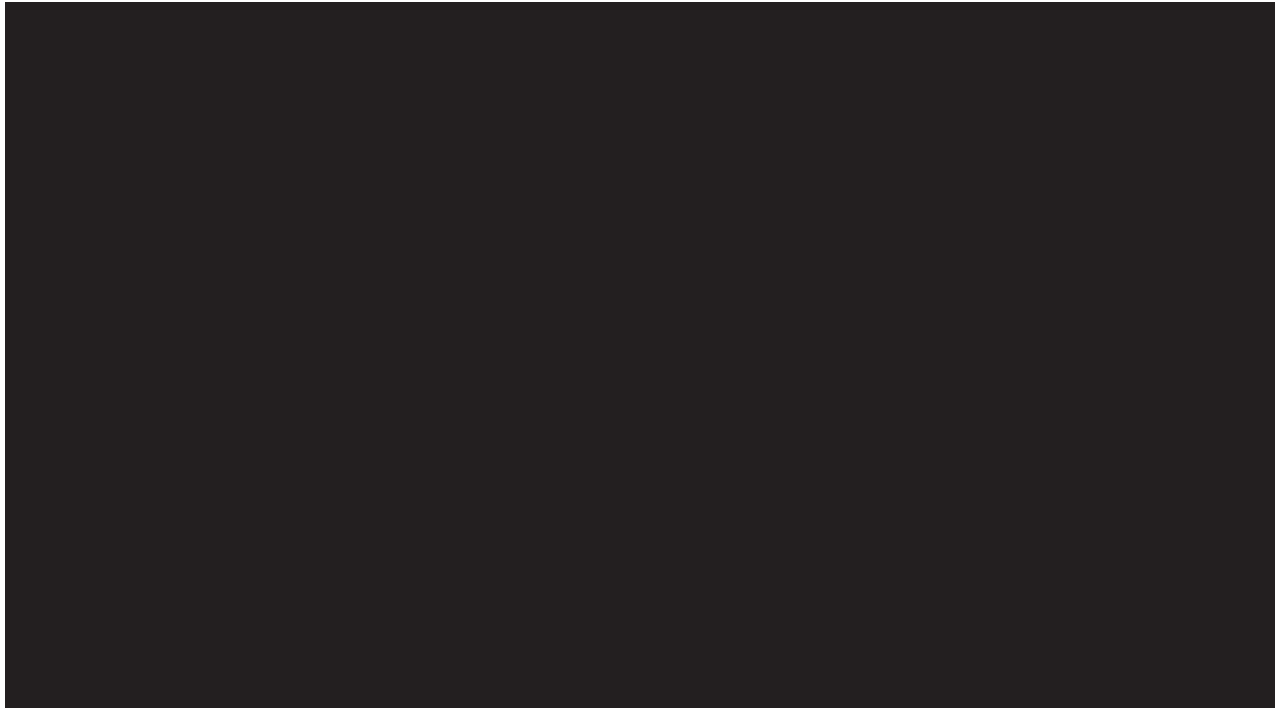

## **8. SAFETY MONITORING AND REPORTING**

### **8.1. Adverse Events**

#### **8.1.1. Definitions**

For the purposes of this Protocol, an adverse event (AE) is defined as any untoward medical occurrence associated with the use of a drug in humans, whether or not considered drug related, that occurs after a subject provides informed consent. Abnormal laboratory values or test results occurring after informed consent constitute AEs only if they induce clinical signs or symptoms, are considered clinically meaningful, require therapy (eg, hematologic abnormality that requires transfusion), or require changes in the study drug(s).

#### **8.1.2. Reporting**

Adverse events that begin or worsen after informed consent should be recorded on the Adverse Events form of the eCRF. Conditions that were already present at the time of informed consent should be recorded on the Medical History form in the eCRF. Monitoring for the occurrence of new AEs should be continued for at least 30 days after the last dose of study drug. Adverse events (including laboratory abnormalities that constitute AEs) should be described using a diagnosis whenever possible rather than by individual underlying signs and symptoms. When a clear diagnosis cannot be identified, each sign or symptom should be reported as a separate AE.

The term "disease progression" should be recorded as an AE/SAE only if there are no other identifiable AEs/SAEs associated with the disease progression at the time of reporting. For events associated with disease progression, the relevant signs and symptoms should be reported using a diagnosis whenever possible rather than individual underlying signs and symptoms.

When a clear diagnosis cannot be identified, each sign or symptom should be reported as a separate AE. If the events resulting from disease progression meet the criteria for an SAE (eg, resulted in hospitalization, a life-threatening event, or death), the specific event(s) should be reported as an SAE(s) as described in Section 8.3.2. In both cases (ie, AEs or SAEs related to disease progression), it should be indicated that each event (reported as a diagnosis or as signs and symptoms) is related to disease progression on the Adverse Events form of the eCRF.

The severity of AEs will be assessed using CTCAE v4.03 Grades 1 through 4. The CTCAE v4.03 severity of Grade 5 will not be used; AEs resulting in death will be graded accordingly using Grades 1 through 4 and have the outcome noted as fatal. If an event is not classified by CTCAE, the severity of the AE will be graded according to the scale below to estimate the grade of severity:

|                |                                                                                                                                                                                               |
|----------------|-----------------------------------------------------------------------------------------------------------------------------------------------------------------------------------------------|
| <b>Grade 1</b> | Mild; asymptomatic or mild symptoms; clinical or diagnostic observations only; intervention not indicated.                                                                                    |
| <b>Grade 2</b> | Moderate; minimal, local, or noninvasive intervention indicated; limiting age-appropriate activities of daily living.                                                                         |
| <b>Grade 3</b> | Severe or medically significant but not immediately life-threatening; hospitalization or prolongation of hospitalization indicated; disabling; limiting self-care activities of daily living. |
| <b>Grade 4</b> | Life-threatening consequences; urgent intervention indicated.                                                                                                                                 |

Note that a grading scale for hyperphosphatemia (elevated serum phosphate) is not included in CTCAE v 4.03. Grading should be applied using the table above ("investigations-other, specify" category in CTCAE v 4.03). Hyperphosphatemia should be graded based on clinical severity (eg, symptoms) and medical intervention measures taken (eg, phosphate binders) and not on phosphate levels.

The occurrence of AEs should be sought by nondirective questioning of the subject during the screening process after signing the ICF and at each visit during the study. Adverse events may also be detected when they are volunteered by the subject during the screening process or between visits, or through physical examination, laboratory test, or other assessments. To the extent possible, each AE should be evaluated to determine:

- The severity grade (CTCAE Grade 1 to 4).
- Whether there is at least a reasonable possibility that the AE is related to the study treatment: suspected (yes) or not suspected (no).
- The start and end dates, unless unresolved at final follow-up.
- The action taken with regard to study drug.
- The event outcome (eg, not recovered/not resolved, recovered/resolved, recovering/resolving, recovered/resolved with sequelae, fatal, unknown).
- The seriousness, as per serious adverse event (SAE) definition provided in Section 8.3.1.

Unlike routine safety assessments, SAEs are monitored continuously and have special reporting requirements (see Section 8.3.2).

All AEs should be treated appropriately. If an AE is treated with a concomitant medication or nondrug therapy, this action should be recorded on Adverse Event form and the treatment should be specified on the Prior/Concomitant Medications or Procedures and Non-Drug Therapy form in the eCRF.

Once an AE is detected, it should be followed until it has resolved or until it is judged to be permanent; assessment should be made at each visit (or more frequently if necessary) of any changes in severity, the suspected relationship to the study drug, the interventions required to treat the event, and the outcome.

When the severity of an AE changes over time for a reporting period (eg, between visits), each change in severity will be reported as a separate AE until the event resolves. For example, 2 separate AEs will be reported if a subject has Grade 1 diarrhea, meeting the definition of an AE, that lasts for 3 days before worsening to a Grade 3 severity. The Grade 1 event will be reported as an AE with a start date equal to the day the event met the Grade 1 AE definition and a stop date equal to the day that the event increased in severity from Grade 1 to Grade 3. The Grade 3 event will also be reported as an AE, with the start date equal to the day the event changed in intensity from Grade 1 to Grade 3 and a stop date equal to the day that the event either changed severity again or resolved.

## **8.2. Laboratory Test Abnormalities**

Laboratory abnormalities that constitute an AE in their own right (considered clinically meaningful, induce clinical signs or symptoms, require concomitant therapy, or require changes in study drug) should be recorded on the Adverse Event form in the eCRF. Whenever possible, a diagnosis rather than a symptom should be provided (eg, "anemia" instead of "low hemoglobin"). Laboratory abnormalities that meet the criteria for AEs should be followed until they have returned to normal or an adequate explanation of the abnormality is found. When an abnormal laboratory test result corresponds to a sign or symptom of a previously reported AE, it is not necessary to separately record the laboratory test result as an additional event.

Laboratory abnormalities that do not meet the definition of an AE should not be reported as AEs. A Grade 3 or 4 (severe) AE does not automatically indicate an SAE unless it meets the definition of serious, as defined in Section 8.3.1. A dose modification for the laboratory abnormality may be required (see Section 5.4) and should not contribute to the designation of a laboratory test abnormality as an SAE.

## **8.3. Serious Adverse Events**

### **8.3.1. Definitions**

An SAE is defined as an event that meets at least 1 of the following criteria:

- Is fatal or life-threatening.
- Requires inpatient hospitalization or prolongation of existing hospitalization, unless hospitalization is a result of:
  - A routine treatment or monitoring of the studied indication not associated with any deterioration in condition.

- An elective surgery or preplanned treatment for a pre-existing condition that is unrelated to the indication under study and has not worsened since signing the ICF.
- A treatment on an emergency outpatient basis for an event not fulfilling any of the definitions of a SAE and not resulting in hospital admission.
- Any social reasons and respite care, in the absence of any deterioration in the subject's general condition.
- Results in persistent or significant disability, incapacity, or a substantial disruption of a person's ability to conduct normal life functions.
- Constitutes a congenital anomaly or birth defect.
- Is considered to be an important medical event or a medically significant event that may not result in death, be immediately life-threatening, or require hospitalization but may be considered serious when, based on appropriate medical judgment, the event may jeopardize the subject or may require medical or surgical intervention to prevent 1 of the outcomes listed above.

### 8.3.2. Reporting

Every SAE, regardless of suspected causality (eg, relationship to study drug(s) or study procedure or disease progression), occurring after the subject has signed the ICF through the last study visit (or 30 days after the last dose of study drug, whichever is later) must be reported to the sponsor (or designee) within **24 hours** of learning of its occurrence, unless otherwise specified by the Protocol. Any SAEs occurring more than 30 days after the last dose of study drug should be reported to the sponsor or its designee only if the investigator suspects a causal relationship to the study drug.

Information about all SAEs is collected and recorded on the Adverse Event form of the eCRF. The investigator must assess and record the causal relationship of each SAE to the study treatment.

The investigator must also complete the Incyte Serious Adverse Event Report Form, in English, and send the completed and signed form to the sponsor or designee within 24 hours of becoming aware of the SAE. The investigator must provide a causality assessment, that is, assess whether there is at least a reasonable possibility that the SAE is related to the study treatment: suspected (yes) or not suspected (no). Refer to the Incyte Reference Guide for Completing the Serious Adverse Event Report Form.

The contact information of the sponsor's study-specific representatives is listed in the investigator manual provided to each site. The original copy of the SAE Report Form and the confirmation sheet must be kept at the study site.

Investigational site personnel must report any new information regarding the SAE within 24 hours of becoming aware of the information in the same manner that the initial SAE Report Form was sent. Follow-up information is recorded on an amended or new SAE Report Form, with an indication that it is follow-up to the previously reported SAE and the date of the original report. The follow-up report should include information that was not provided on the previous



SAE Report Form, such as the outcome of the event (eg, resolved or ongoing), treatment provided, action taken with study drug because of the SAE (eg, dose reduced, interrupted, or discontinued), or subject disposition (eg, continued or withdrew from study participation). Each recurrence, complication, or progression of the original event should be reported as follow-up to that event, regardless of when it occurs.

If the SAE is not documented in the IB for the study drug (new occurrence) and is thought to be related to the sponsor's study drug, the sponsor or its designee may urgently require further information from the investigator for reporting to health authorities. The sponsor or its designee may need to issue an Investigator Notification (IN) to inform all investigators involved in any study with the same drug that this SAE has been reported. Suspected Unexpected Serious Adverse Reactions (SUSARs) will be collected and reported to the competent authorities and relevant ethics committees in accordance with Directive 2001/20/EC, or as per national regulatory requirements in participating countries.

#### **8.4. Emergency Unblinding of Treatment Assignment**

Not applicable.

#### **8.5. Pregnancy**

Pregnancy, in and of itself, is not regarded as an AE unless there is suspicion that study drug may have interfered with the effectiveness of a contraceptive medication or method. When a pregnancy has been confirmed in a subject during maternal or paternal exposure to study drug, the following procedures should be followed in order to ensure subject safety:

- The study drug must be discontinued immediately (female subjects only; see Section 5.4.2 for the maximum permitted duration of study drug interruption).
- The investigator must complete and submit the Incyte Clinical Trial Pregnancy form to the sponsor or its designee within **24 hours** of learning of the pregnancy.

Data on fetal outcome and breastfeeding are collected for regulatory reporting and drug safety evaluation. Follow-up should be conducted for each pregnancy to determine outcome, including spontaneous or voluntary termination, details of the birth, and the presence or absence of any birth defects, congenital abnormalities, or maternal and/or newborn complications, by following until the first well-baby visit. Pregnancy should be recorded on a Clinical Trial Pregnancy form and reported by the investigator to the sponsor or its designee. Pregnancy follow-up information should be recorded on the same form and should include an assessment of the possible causal relationship to the sponsor's study drug to any pregnancy outcome, as well as follow-up to the first well-baby visit or the duration specified in local regulations, whichever is later. Refer to the Incyte Reference Guide for Completing the Clinical Trial Pregnancy Form.

**Any SAE occurring during pregnancy must be recorded on the SAE report form and submitted to the sponsor or designee.**

## **8.6. Warnings and Precautions**

Special warnings or precautions for the study drug, derived from safety information collected by the sponsor or its designee, are presented in the [IB](#). Additional safety information collected between IB updates will be communicated in the form of Investigator Notifications (INs). Any important new safety information should be discussed with the subject during the study, as necessary. If new significant risks are identified, they will be added to the ICF.

## **8.7. Data Monitoring Committee**

Not applicable.

## **8.8. Product Complaints**

The sponsor collects product complaints on study drugs and drug delivery systems used in clinical studies in order to ensure the safety of study participants, monitor quality, and facilitate process and product improvements.

All product complaints associated with material packaged, labeled, and released by the sponsor or its designee will be reported to the sponsor. All product complaints associated with other study material will be reported directly to the respective manufacturer.

The investigator or his/her designee is responsible for reporting a complete description of the product complaint via email or other written communication to the sponsor contact or respective manufacturer as noted in the packaging information. Any AE associated with a product complaint should be reported as described in Section [8.1.2](#) of this Protocol.

If the investigator is asked to return the product for investigation, he/she will return a copy of the product complaint communication with the product.

## **9. STATISTICS**

### **9.1. Study Populations**

The efficacy evaluable population includes all subjects who have a known FGF/FGFR alteration from the central genomics laboratory and received at least 1 dose of study drug, and all subjects in the US who have a negative FGF/FGFR alteration from the central genomics laboratory and received at least 1 dose of study drug.

The per protocol (PP) population includes all efficacy subjects who were sufficiently compliant with the Protocol.

The safety population includes all subjects who received at least 1 dose of study drug.

### **9.2. Selection of Sample Size**

Approximately 100 subjects with documentation of FGFR2 translocation from the central genomics laboratory are planned for the final analysis of the primary endpoint of ORR. With the assumed rates of 33% for the intervention, a sample size of approximately 100 subjects would provide > 95% probability to have a 95% confidence interval with lower limit of > 15%

assuming 10% lost to follow-up. Up to 20 subjects will be enrolled in Cohorts B and C (US only), respectively, which will provide > 80% chance of observing at least 4 responders in each cohort if the underlying ORR is 30%.

### **9.3. Level of Significance**

The level of significance for the primary endpoint is 1-sided 5%.

### **9.4. Statistical Analyses**

Subjects will be summarized by cohorts, and cohort determination will be based on FGF/FGFR status from the central genomics laboratory.

#### **9.4.1. Efficacy Analyses**

##### **9.4.1.1. Primary Efficacy Analyses**

The primary endpoint of the study is ORR in subjects with FGFR2 translocations based on the central genomics laboratory results, defined as the proportion of subjects who achieved a CR or a PR based on RECIST v1.1 as assessed by an independent centralized radiological review committee. This analysis will be based on efficacy evaluation population. Subjects who do not have sufficient baseline or on-study response assessment information to be adequately assessed for response status will be included in the denominators in the calculation of ORR. The 95% CI for the ORR will be estimated using the Clopper-Pearson method.

The ORR will also be analyzed based on per protocol population as sensitivity analysis.

##### **9.4.1.2. Secondary Efficacy Analyses**

Secondary efficacy analysis will be conducted for the efficacy evaluable population.

Objective response rate in subjects with FGF/FGFR alterations other than FGFR2 translocations, in subjects negative for FGF/FGFR alteration and in all subjects with FGF/FGFR alterations will be analyzed in the same fashion as the primary analysis.

For objective responders, DOR is defined as the time from the date that a subject first achieves CR or PR based on RECIST v1.1 until the date of first documented disease progression based on RECIST v1.1 or death. Subjects who are alive without progression before analysis cut-off date will be censored. Censoring of DOR will follow the same algorithm as the censoring of PFS. Duration of response data will be analyzed by the Kaplan-Meier method for all cohorts.

Disease control rate, defined as the proportion of subjects who achieved CR, PR, or SD per RECIST v1.1 will be analyzed in the same fashion as the primary analysis.

Progression-free survival is defined as the time from the first day of taking study dose to the earlier of death or disease progression by RECIST v1.1 as assessed by the central radiographic review committee. Subjects who are alive without progression before analysis cut-off date will be censored. Censoring for PFS will follow FDA guidance. Progression-free survival data will be analyzed by the Kaplan-Meier method for all cohorts.

Overall survival is defined as the number of days from the first day taking study drug to death due to any cause. Subjects without death observed at the time of the analysis will be censored at last date known to be alive. Overall survival will be analyzed by the Kaplan-Meier method.

## **9.4.2. Safety Analyses**

### **9.4.2.1. Adverse Events**

A TEAE is any AE either reported for the first time or worsening of a pre-existing event after first dose of study drug. Analysis of AEs will be limited to TEAEs, but data listings will include all AEs regardless of their timing to study drug administration. Adverse events will be tabulated by the MedDRA preferred term and system organ class. Severity of AEs will be based on the National Cancer Institute (NCI) CTCAE v4.03 using Grades 1 through 4 (NCI 2010).

The subset of AEs considered by the investigator to have a relationship to study drug will be considered to be treatment-related AEs. If the investigator does not specify the relationship of the AE to study drug, the AE will be considered treatment-related. The incidence of AEs and treatment-related AEs will be tabulated.

Subjects taking INCB054828 may develop HP, which is a known effect of selective FGFR inhibitors. The number and percentage of subjects with at least 1 event of HP will be tabulated.

### **9.4.2.2. Clinical Laboratory Tests**

Laboratory test values outside the normal range will be assessed for severity based on the normal ranges for the clinical reference laboratory. The incidence of abnormal laboratory values and shift tables relative to baseline will be tabulated.

Laboratory data will be classified into Grades 1 through 4 using CTCAE v4.03. The following summaries will be produced for the laboratory data:

- Number and percentage of subjects with worst postbaseline CTCAE grade (regardless of baseline value). Each subject will be counted only for the worst grade observed postbaseline.
- Shift tables from baseline to the worst postbaseline value using CTCAE grade.
- For laboratory parameters where CTCAE grades are not defined, shift tables to the worst postbaseline value using the low/normal/high classifications based on laboratory reference ranges.

### 9.4.2.3. Vital Signs

Descriptive statistics and mean change from baseline will be determined for vital signs (blood pressure, pulse, respiratory rate, and body temperature) at each assessment time. Vital sign results will be reviewed for clinically notable abnormalities (see [Table 9](#)), and subjects exhibiting clinically notable vital sign abnormalities will be listed. A value will be considered an "alert" value if it is outside the established range and shows a > 25% change from baseline.

**Table 9: Criteria for Clinically Notable Vital Sign Abnormalities**

| Parameter                | High Threshold | Low Threshold |
|--------------------------|----------------|---------------|
| Systolic blood pressure  | > 155 mmHg     | < 85 mmHg     |
| Diastolic blood pressure | > 100 mmHg     | < 40 mmHg     |
| Pulse                    | > 100 bpm      | < 45 bpm      |
| Temperature              | > 38°C         | < 35.5°C      |
| Respiratory rate         | > 24/min       | < 8/min       |

### 9.4.2.4. Electrocardiograms

Descriptive statistics and mean change from baseline will be determined for each ECG parameter at each assessment time. Electrocardiogram results will be reviewed for clinically notable abnormalities according to predefined criteria ([Table 10](#)). Subjects exhibiting clinically notable ECG abnormalities will be listed.

**Table 10: Criteria for Clinically Notable Electrocardiogram Abnormalities**

| Parameter | High Threshold | Low Threshold |
|-----------|----------------|---------------|
| QTcF      | > 450 msec     | < 295 msec    |
| PR        | > 220 msec     | < 75 msec     |
| QRS       | > 120 msec     | < 50 msec     |
| QT        | > 500 msec     | < 300 msec    |

QTcF = Fridericia correction.

### 9.4.3. Pharmacokinetic Analysis

The data will be analyzed by standard population PK methods using appropriate software (eg, NONMEM). An attempt will be made to evaluate the effect of demographic characteristics and baseline characteristics (eg, age, weight, sex, race, renal function, FGF/FGFR alteration status) on the population PK profile. Additionally, exposure-response analyses for key efficacy and safety parameters will also be considered if there is sufficient data available ([Appendix C](#)).

## 9.5. Analyses for the Data Monitoring Committee

Not applicable.

## 9.6. Futility Analysis

For Cohort A (FGFR2 translocation), futility analysis will be performed when approximately 25 subjects are enrolled into the cohort and have at least 1 tumor assessment or have permanently discontinued study treatment. Cohort A can be stopped for futility if 2 or less responders are

observed, for which there is less than 10% probability of claiming ORR > 15% based on a 60 subject cohort, as initially planned before Amendment 5. This rule is just a guidance and nonbinding.

Cohorts B (other FGF/FGFR alterations) and C (US only; negative for FGF/FGFR alterations) can be stopped if 1 or less responders are observed within the first 10 subjects who have at least 2 cycles of data. This is just a guidance and nonbinding.

## **10. ETHICAL CONSIDERATIONS AND ADMINISTRATIVE PROCEDURES**

### **10.1. Investigator Responsibilities**

This study will be performed in accordance with ethical principles that originate in the Declaration of Helsinki and conducted in adherence to the study Protocol; GCPs as defined in Title 21 of the US CFR Parts 11, 50, 54, 56, and 312; ICH E6 GCP consolidated guidelines; and local regulatory requirements as applicable to the study locations.

The investigator will be responsible for:

- Permitting study-related monitoring, sponsor audits, IRB/IEC review, and regulatory inspections by providing direct access to source data and other relevant clinical study documents.
  - Monitoring: Qualified representatives of the sponsor or its designee, study monitors, will monitor the study according to a predetermined plan. The investigator must allow the study monitors to review any study materials and subject records at each monitoring visit.
  - Auditing: Qualified representatives of the sponsor or its designee may audit the clinical study site and study data to evaluate compliance with the Protocol, applicable local clinical study regulations, and overall study conduct. The investigator must allow the auditors to review original source records and study documentation for all subjects.
  - Regulatory inspection: Regulatory authorities may conduct an inspection of the study and the site at any time during the development of an investigational product. The investigator and staff are expected to cooperate with the inspectors and allow access to all source documents supporting the eCRFs and other study-related documents. The investigator must immediately notify the sponsor when contacted by any regulatory authority for the purposes of conducting an inspection.
- Obtaining informed consent and ensuring that the study subjects' questions have been answered and the subjects fully understand study procedures:
  - Informed consent must be obtained before any study-related procedures are conducted, unless otherwise specified by the Protocol.

- Informed consent must be obtained using the IRB/IEC-approved version in a language that is native and understandable to the subject. A template will be provided by the sponsor or its designee. The sponsor or its designee must review and acknowledge the site-specific changes to the ICF template. The ICF must include a statement that the sponsor or its designee and regulatory authorities have direct access to subject records.
- Obtaining approval from the IRB/IEC before the start of the study and for any changes to the clinical study Protocol, important Protocol deviations, routine updates, and safety information in accordance with institutional requirements and local law.
  - The investigator is responsible for ensuring that the safety reports provided by the sponsor are reviewed and processed in accordance with regulatory requirements and with the policies and procedures established by the IRB/IEC.
- Adhering to the Protocol as described in this document and agreeing that changes to the Protocol procedures, with the exception of medical emergencies, must be discussed and approved, first, by the sponsor or its designee and, second, by the IRB/IEC. Each investigator is responsible for enrolling subjects who have met the specified eligibility criteria.
- Retaining records in accordance with all local, national, and regulatory laws, but for a minimum period of at least 2 years after the last marketing application approval in an ICH region and until there are no pending or contemplated marketing applications in an ICH region, or if not approved, 2 years after the termination of the test article for investigation to ensure the availability of study documentation should it become necessary for the sponsor or a regulatory authority to review.
  - The investigator must not destroy any records associated with the study without receiving approval from the sponsor. The investigator must notify the sponsor or its designee in the event of accidental loss or destruction of any study records. If the investigator leaves the institution where the study was conducted, the sponsor or its designee must be contacted to arrange alternative record storage options.
  - All eCRF data entered by the site (including audit trail), as well as computer hardware and software (for accessing the data), will be maintained or made available at the site in compliance with applicable record retention regulations. The sponsor will retain the original eCRF data and audit trail.

## **10.2. Accountability, Handling, and Disposal of Study Drug**

The investigator is responsible for drug accountability at the study site; however, some of the drug accountability duties may be assigned to an appropriate pharmacist or other designee. Inventory and accountability records must be maintained and readily available for inspection by the study monitor and are open to inspection at any time by any applicable regulatory authorities. The investigator or designee must maintain records that document:

- Delivery of study drug to the study site.
- Inventory of study drug at the site.

- Subject use of the study drug including pill or unit counts from each supply dispensed.
- Return of study drug to the investigator or designee by subjects.

The investigational product must be used only in accordance with the Protocol. The investigator will also maintain records adequately documenting that the subjects were provided the specified study drug. These records should include dates, quantities, and any available batch or serial numbers or unique code numbers assigned to the investigational product and study subjects.

Completed accountability records will be archived by the site. The investigator or designee will be expected to collect and retain all used, unused, and partially used containers of study drug until verified by the study monitor (unless otherwise agreed to by the sponsor). At the conclusion of the study, the investigator or designee will oversee shipment of any remaining study drug back to the sponsor or its designee for destruction according to institutional standard operating procedures. If local procedures mandate on-site destruction of investigational supply, the site should (where local procedures allow) maintain the investigational supply until the study monitor inspects the accountability records in order to evaluate compliance and accuracy of accountability by the investigative site. At sites where the study drug is destroyed before monitor inspection, the monitors rely on documentation of destruction per the site SOP.

### **10.3. Data Management**

Data management will be performed in a validated database via an Electronic Data Capture (EDC) system. All data entry, verification, and validation will be performed in accordance with the current standard operating procedures of the Data Management Department at the sponsor or its designee. The database will be authorized for lock once all defined procedures are completed.

The investigator will be provided with access to an EDC system so that an eCRF can be completed for each subject. Entries made in the eCRF must be verifiable against source documents; if updates to the database are not possible, any discrepancies should be explained and documented. The investigator will be responsible for reviewing all data and eCRF entries, and will sign and date the designated forms in each subject's eCRF, verifying that the information is true and correct. The investigator is responsible for the review and approval of all query responses.

Protocol deviations will be identified and recorded in the Protocol Deviation form of the eCRF. The study monitor will reference the Monitoring Plan in order to ensure that each issue identified is appropriately documented, reported, and resolved in a timely manner in accordance with the plan's requirements.

### **10.4. Data Privacy and Confidentiality of Study Records**

The investigator and the sponsor or its designee must adhere to applicable data privacy laws and regulations. The investigator and the sponsor or its designee are responsible for ensuring that sensitive information is handled in accordance with local requirements (eg, HIPAA). Appropriate consent and authorizations for use and disclosure and/or transfer (if applicable) of protected information must be obtained.



Subject names will not be supplied to the sponsor or its designee, if applicable. Only the subject number and subject's initials (subject's initials will only be recorded if allowable by local regulations) will be recorded in the eCRF, where permitted; if the subject's name appears on any other document (eg, laboratory report), it must be obliterated on the copy of the document to be supplied to the sponsor or its designee. Study findings stored on a computer will be stored in accordance with local data protection laws. The subjects will be informed that representatives of the sponsor or its designee, IRB or IEC, or regulatory authorities may inspect their medical records to verify the information collected, and that all personal information made available for inspection will be handled in strictest confidence and in accordance with local data protection laws.

### **10.5. Financial Disclosure**

Before study initiation, all clinical investigators participating in clinical studies subject to FDA Regulation Title 21 Code of Federal Regulations (CFR) Part 54 – Financial Disclosure by Clinical Investigators (ie, "covered studies") are required to submit a completed Clinical Investigator Financial Disclosure form that sufficiently details any financial interests and arrangements that apply. For the purpose of this regulation, "clinical investigator" is defined as any investigator or subinvestigator who is directly involved in the treatment or evaluation of research subjects, including the spouse and each dependent child of the clinical investigator or subinvestigator. These requirements apply to both US and foreign clinical investigators conducting covered clinical studies.

Any new clinical investigators added to the covered clinical study during its conduct must also submit a completed Investigator Financial Disclosure Form. During a covered clinical study, any changes to the financial information previously reported by a clinical investigator must be reported to the sponsor or its designee. At the conclusion of the covered clinical study, the clinical investigators will be reminded of their obligations. In the event that the clinical investigator is not reminded, they nevertheless will remain obligated to report to the sponsor or its designee any changes to the financial information previously reported, as well as any changes in their financial information for a period of 1 year after completion of the covered clinical study.

### **10.6. Publication Policy**

By signing the study Protocol, the investigator and his or her institution agree that the results of the study may be used by the sponsor, Incyte Corporation (Incyte), for the purposes of national and international registration, publication, and information for medical and pharmaceutical professionals. Study results will be published in accordance with applicable local and national regulations. If necessary, the authorities will be notified of the investigator's name, address, qualifications, and extent of involvement. The terms regarding the publication of study results are contained in the agreement signed with the sponsor or its designee. A signed agreement will be retained by the sponsor or its designee.

## 11. REFERENCES

- Ang C. Role of the fibroblast growth factor receptor axis in cholangiocarcinoma. *J Gastroenterol Hepatol* 2015;30:1116-1122.
- Arai Y, Totoki Y, Hosoda F, et al. Fibroblast growth factor receptor 2 tyrosine kinase fusions define a unique molecular subtype of cholangiocarcinoma. *Hepatology* 2014;59:1427-1434.
- Arora A, Scholar EM. Role of tyrosine kinase inhibitors in cancer therapy. *J Pharmacol Exp Ther* 2005;315:971-979.
- Baum M, Schiavi S, Dwarakanath V, Quigley R. Effect of fibroblast growth factor-23 on phosphate transport in proximal tubules. *Kidney Int* 2005;68:1148-1153.
- Bergquist A, von Seth E. Epidemiology of cholangiocarcinoma. *Best Pract Res Clin Gastroenterol* 2015;29:221-232.
- Blechacz BR, Gores GJ. Cholangiocarcinoma. *Clin Liver Dis* 2008;12:131-150.
- Brown AP, Courtney CL, King LM, Groom SC, Graziano MJ. Cartilage dysplasia and tissue mineralization in the rat following administration of a FGF receptor tyrosine kinase inhibitor. *Toxicol Pathol* 2005;33:449-455.
- Brown AP. Development of serum calcium and phosphorus as clinical biomarkers for drug induced systemic mineralization: case study with a MEK inhibitor. In: Gad SC, ed. *Pharmaceutical Sciences Encyclopedia: Drug Discovery, Development, and Manufacturing*. Hoboken, NJ: John Wiley & Sons; 2010:1-22.
- Churi CR, Shroff R, Wang Y, et al. Mutation profiling in cholangiocarcinoma: prognostic and therapeutic implications. *PLoS One* 2014;9:e115383.
- Clinical Trial Facilitation Group (CTFG). Recommendations related to contraception and pregnancy testing in clinical trials. September 15, 2014. <http://www.hma.eu/ctfg.html>. Accessed May 25, 2016.
- Dailey L, Ambrosetti D, Mansukhani A, Basilico C. Mechanisms underlying differential responses to FGF signaling. *Cytokine Growth Factor Rev* 2005;16:233-247.
- Donnem T, Al-Shibli K, Al-Saad S, Busund LT, Bremnes RM. Prognostic impact of fibroblast growth factor 2 in non-small cell lung cancer: coexpression with VEGFR-3 and PDGF-B predicts poor survival. *J Thorac Oncol* 2009;4:578-585.
- Eckman KR, Patel DK, Landgraf A, et al. Chemotherapy outcomes for the treatment of unresectable intrahepatic and hilar cholangiocarcinoma: a retrospective analysis. *Gastrointest Cancer Res* 2011; 4:155-160.
- Eisenhauer EA, Therasse P, Bogaerts J, et al. New response evaluation criteria in solid tumors: revised RECIST guideline (version 1.1). *Eur J Cancer* 2009;45:228-247.
- Eswarakumar VP, Lax I, Schlessinger J. Cellular signaling by fibroblast growth factor receptors. *Cytokine Growth Factor Rev* 2005;16:139-149.

Farrow EG, White KE. Recent advances in renal phosphate handling. *Nat Rev Nephrol* 2010;6:207-217.

Fuks Z, Persaud RS, Alfieri A, et al. Basic fibroblast growth factor protects endothelial cells against radiation-induced programmed cell death in vitro and in vivo. *Cancer Res* 1994;54:2582-2590.

Graham RP, Barr Fritcher EG, Pestova E, et al. Fibroblast growth factor receptor 2 translocations in intrahepatic cholangiocarcinoma. *Human Pathology* 2014;45:1630-1638.

Guagnano V, Kauffmann A, Wöhrle S, et al. FGFR genetic alterations predict for sensitivity to NVP-BGJ398, a selective pan-FGFR inhibitor. *Cancer Discov* 2012;2:1118-1133.

INCB054828 Investigator's Brochure (IB). Wilmington, DE: Incyte Corporation.

Itoh N. Hormone-like (endocrine) Fgfs: their evolutionary history and roles in development, metabolism, and disease. *Cell Tissue Res* 2010;342:1-11.

Javle M, Lowery M, Shroff RT, et al. Phase II Study of BGJ398 in Patients With FGFR-Altered Advanced Cholangiocarcinoma. *J Clin Oncol* 2018;36:276-282.

Knights V, Cook SJ. De-regulated FGF receptors as therapeutic targets in cancer. *Pharmacol Ther* 2010;125:105-117.

Kunii K, Davis L, Gorenstein J, et al. FGFR2-amplified gastric cancer cell lines require FGFR2 and Erbb3 signaling for growth and survival. *Cancer Res* 2008;68:2340-2348.

Lamont FR, Tomlinson DC, Cooper PA, Shnyder SD, Chester JD, Knowles MA. Small molecule FGF receptor inhibitors block FGFR-dependent urothelial carcinoma growth in vitro and in vivo. *Br J Cancer* 2011;104:75-82.

National Cancer Institute (NCI). Common Terminology Criteria for Adverse Events (CTCAE) Version 4.03. 2010. [http://evs.nci.nih.gov/ftp1/CTCAE/CTCAE\\_4.03\\_2010-06-14\\_QuickReference\\_5x7.pdf](http://evs.nci.nih.gov/ftp1/CTCAE/CTCAE_4.03_2010-06-14_QuickReference_5x7.pdf). Accessed October 14, 2014.

National Cancer Institute (NCI). SEER Stat Fact Sheets: Liver and Intrahepatic Bile Duct Cancer. 2016. <http://seer.cancer.gov/statfacts/html/livibd.html>. Accessed June 1, 2016.

Oken MM, Creech RH, Tormey DC, et al. Toxicity and response criteria of the Eastern Cooperative Oncology Group. *Am J Clin Oncol* 1982;5:649-655.

Pai R, French D, Ma N, et al. Antibody-mediated inhibition of fibroblast growth factor 19 results in increased bile acids synthesis and ileal malabsorption of bile acids in cynomolgus monkeys. *Toxicol Sci* 2012;126:446-456.

Pardo OE, Arcaro A, Salerno G, Raguz S, Downward J, Seckl MJ. Fibroblast growth factor-2 induces translational regulation of Bcl-XL and Bcl-2 via a MEK-dependent pathway: correlation with resistance to etoposide-induced apoptosis. *J Biol Chem* 2002;277:12040-12046.

Qing J, Du X, Chen Y, et al. Antibody-based targeting of FGFR3 in bladder carcinoma and t(4;14)-positive multiple myeloma in mice. *J Clin Invest* 2009;119:1216-1229.

Rades D, Setter C, Dahl O, Schild SE, Noack F. Fibroblast growth factor 2--a predictor of outcome for patients irradiated for stage II-III non-small-cell lung cancer. *Int J Radiat Oncol Biol Phys* 2012;82:442-447.

Rizvi S, Gores GJ. Pathogenesis, diagnosis, and management of cholangiocarcinoma. *Gastroenterology* 2013;145:1215-1229.

Ross JS, Wang K, Gay L, Al-Rohil R, et al. New routes to targeted therapy of intrahepatic cholangiocarcinomas revealed by next-generation sequencing. *Oncologist* 2014;19:235-242.

Shimada T, Hasegawa H, Yamazaki Y, et al. FGF-23 is a potent regulator of vitamin D metabolism and phosphate homeostasis. *J Bone Miner Res* 2004a;19:429-435.

Shimada T, Mizutani S, Muto T, et al. Cloning and characterization of FGF23 as a causative factor of tumor-induced osteomalacia. *Proc Natl Acad Sci USA* 2001;98:6500-6505.

Shimada T, Urakawa I, Yamazaki Y, et al. FGF-23 transgenic mice demonstrate hypophosphatemic rickets with reduced expression of sodium phosphate cotransporter type IIa. *Biochem Biophys Res Commun* 2004b;314:409-414.

Terai H, Soejima K, Yasuda H, et al. Activation of the FGF2-FGFR1 autocrine pathway: a novel mechanism of acquired resistance to gefitinib in NSCLC. *Mol Cancer Res* 2013;11:759-767.

Turner N, Grose R. Fibroblast growth factor signalling: from development to cancer. *Nat Rev Cancer* 2010;10:116-129.

Weiss J, Sos ML, Seidel D, et al. Frequent and focal FGFR1 amplification associates with therapeutically tractable FGFR1 dependency in squamous cell lung cancer. *Sci Transl Med* 2010;2:62ra93.

Wöhrle S, Bonny O, Beluch N, et al. FGF receptors control vitamin D and phosphate homeostasis by mediating renal FGF-23 signaling and regulating FGF-23 expression in bone. *J Bone Mineral Res* 2011;26:2486-2497.

Wu YM, Su F, Kalyana-Sundaram S, et al. Identification of targetable FGFR gene fusions in diverse cancers. *Cancer Discov* 2013;3:636-647.

Yanochko GM, Vitsky A, Heyen JR, et al. Pan-FGFR inhibition leads to blockade of FGF23 signaling, soft tissue mineralization, and cardiovascular dysfunction. *Toxicol Sci* 2013;135:451-464.

## **APPENDIX A. INFORMATION REGARDING EFFECTIVENESS OF CONTRACEPTIVE METHODS**

### **For Subjects Participating in the Study:**

The following methods that can achieve a failure rate of less than 1% per year when used consistently and correctly are considered as highly effective birth control methods.

Such methods include:

- Combined (estrogen and progestogen containing) hormonal contraception associated with inhibition of ovulation<sup>1</sup>
  - oral
  - intravaginal
  - transdermal
- Progestogen-only hormonal contraception associated with inhibition of ovulation<sup>1</sup>
  - oral
  - injectable
  - implantable<sup>2</sup>
- Intrauterine device (IUD)<sup>2</sup>
- Intrauterine hormone-releasing system (IUS)<sup>2</sup>
- Bilateral tubal occlusion<sup>2</sup>
- Vasectomised partner<sup>2,3</sup>
- Sexual abstinence<sup>4</sup>

<sup>1</sup> Hormonal contraception may be susceptible to interaction with the IMP, which may reduce the efficacy of the contraception method.

<sup>2</sup> Contraception methods that in the context of this guidance are considered to have low user dependency.

<sup>3</sup> Vasectomised partner is a highly effective method provided of avoiding pregnancy that partner is the sole sexual partner of the WOCBP trial participant and that the vasectomised partner has received medical assessment of the surgical success.

<sup>4</sup> In the context of this guidance, sexual abstinence is considered a highly effective method only if defined as refraining from heterosexual intercourse during the entire period of risk associated with the study treatments. The reliability of sexual abstinence needs to be evaluated in relation to the duration of the clinical trial and the preferred and usual lifestyle of the subject.

Source: [CTFG 2014](#).

## APPENDIX B. POTENT CYP3A4 INDUCERS AND INHIBITORS

University of Washington School of Pharmaceutics: Drug Interaction Database Program, 2002. <http://www.druginteractioninfo.org>. Accessed May 2015. Highlighted rows indicate recent additions to the lists at the time the database search was performed.

| Inhibitor                                                       | Therapeutic Class        | Inhibitor dosing (oral)                                           |
|-----------------------------------------------------------------|--------------------------|-------------------------------------------------------------------|
| <b>Potent CYP3A Inhibitors (yielding substrate AUCr &gt; 5)</b> |                          |                                                                   |
| indinavir /RIT                                                  | Protease Inhibitors      | 800/100 mg BID (1 day)                                            |
| tipranavir/RIT                                                  | Protease Inhibitors      | 500/200 mg BID (2 days)                                           |
| ritonavir                                                       | Protease Inhibitors      | 3 doses of 100 mg over 24 h                                       |
| cobicistat (GS-9350)                                            | None                     | 200 mg QD (14 days)                                               |
| indinavir                                                       | Protease Inhibitors      | 800 mg TID (7 days)                                               |
| ketoconazole                                                    | Antifungals              | 400 mg QD (4 days)                                                |
| troleandomycin                                                  | Antibiotics              | 500 mg single dose                                                |
| telaprevir                                                      | Antivirals               | 750 mg TID (16 days)                                              |
| danoprevir / RIT                                                | Antivirals               | 200/100 mg QD (14 days)                                           |
| elvitegravir / RIT                                              | Treatments of AIDS       | 150/100 mg QD (10 days)                                           |
| saquinavir / RIT                                                | Protease Inhibitors      | 1000/100 mg BID (14 days)                                         |
| lopinavir / RIT                                                 | Protease Inhibitors      | 400/100 mg BID (2 days)                                           |
| itraconazole                                                    | Antifungals              | 200 mg QD (4 days)                                                |
| voriconazole                                                    | Antifungals              | 200 mg BID (9 days)                                               |
| mibefradil                                                      | Calcium Channel Blockers | 100 mg single dose                                                |
| LCL161                                                          | Cancer Treatments        | 600 mg single dose                                                |
| clarithromycin                                                  | Antibiotics              | 500 mg BID (7 days)                                               |
| posaconazole                                                    | Antifungals              | 400 mg BID (7 days)                                               |
| telithromycin                                                   | Antibiotics              | 800 mg QD (6 days)                                                |
| grapefruit juice DS <sup>2</sup>                                | Food Products            | 240 mL TID (2 days) and 90 min, 60 min, 30 min prior to midazolam |
| conivaptan                                                      | Diuretics                | 40 mg BID (5 days)                                                |
| nefazodone                                                      | Antidepressants          | 100-200 mg BID (12 days)                                          |
| nelfinavir                                                      | Protease Inhibitors      | 1250 mg BID (14 days)                                             |
| saquinavir                                                      | Protease Inhibitors      | 1200 mg TID (5 days)                                              |
| idelalisib                                                      | Kinase Inhibitors        | 150 mg BID (8 days)                                               |
| boceprevir                                                      | Antivirals               | 800 mg TID (6 days)                                               |

| Inducers                                                                                   | Therapeutic class     | Object (oral, unless otherwise specified) | % ↓ AUC      | % ↑ oral CL  | Precipitant Dose (oral)                |
|--------------------------------------------------------------------------------------------|-----------------------|-------------------------------------------|--------------|--------------|----------------------------------------|
| <b>Potent Inducers (AUC decreased by ≥ 80% or CL increased by more than 5 fold (400%))</b> |                       |                                           |              |              |                                        |
| rifampin                                                                                   | Antibiotics           | budesonide                                | 99.7         | 36904.5      | 600 mg QD (7 days)                     |
| mitotane                                                                                   | Other Antineoplastics | midazolam                                 | 94.5         | Not Provided | maximum of 3.5 g TID (chronic therapy) |
| avasimibe                                                                                  | Other Antilipemics    | midazolam                                 | 93.5         | Not Provided | 750 mg/day (7 days)                    |
| phenytoin                                                                                  | Anticonvulsants       | nisoldipine                               | 89.5         | Not Provided | 200-450 mg/day (chronic treatment)     |
| carbamazepine                                                                              | Anticonvulsants       | quetiapine                                | 86.6         | 643.1        | 200 mg TID (26 days)                   |
| enzalutamide                                                                               | Antiandrogens         | midazolam                                 | 85.9         | Not Provided | 160 mg QD (85±3 days)                  |
| St John's Wort                                                                             | Herbal Medications    | midazolam                                 | 80.0         | Not Provided | 300 mg TID (14 days)                   |
| rifabutin                                                                                  | Antibiotics           | delavirdine                               | Not Provided | 458.0        | 300 mg QD (14 days)                    |
| phenobarbital                                                                              | Anticonvulsants       | verapamil                                 | 76.6         | 400.9        | 100 mg QD (21 days)                    |

## APPENDIX C. PHARMACOKINETIC ANALYTICAL PARAMETERS

|                                                      |                                                                                                                                                                                                                                                                                                                  |
|------------------------------------------------------|------------------------------------------------------------------------------------------------------------------------------------------------------------------------------------------------------------------------------------------------------------------------------------------------------------------|
| $C_{ave}$                                            | Average steady-state plasma concentration ( $AUC_{0-12h}/12h$ or $AUC_{0-24h}/24h$ )                                                                                                                                                                                                                             |
| $C_{max}$                                            | Maximum observed plasma concentration                                                                                                                                                                                                                                                                            |
| $C_{min}$                                            | Minimum observed plasma concentration during the dosing interval                                                                                                                                                                                                                                                 |
| $T_{max}$                                            | Time to maximum plasma concentration                                                                                                                                                                                                                                                                             |
| $AUC_{0-t}$                                          | Area under the single-dose plasma concentration-time curve from Hour 0 to the last quantifiable measurable plasma concentration, calculated by the linear trapezoidal rule for increasing concentrations and the log trapezoidal rule for decreasing concentrations                                              |
| $AUC_{0-\tau}$ (ie, $AUC_{0-12h}$ or $AUC_{0-24h}$ ) | Area under the steady-state plasma concentration-time curve over 1 dosing interval (ie, from Hour 0 to 12 for BID administration or from Hour 0 to 24 for QD administration), calculated by the linear trapezoidal rule for increasing concentrations and the log trapezoidal rule for decreasing concentrations |
| $\lambda_z$                                          | Apparent terminal phase disposition rate constant, where $\lambda_z$ is the magnitude of the slope of the linear regression of the log concentration versus time profile during the terminal phase                                                                                                               |
| $t_{1/2}$                                            | Apparent plasma terminal phase disposition half-life (whenever possible), where $t_{1/2} = (\ln 2) / \lambda_z$                                                                                                                                                                                                  |
| Cl/F                                                 | Oral dose clearance                                                                                                                                                                                                                                                                                              |
| $V_z/F$                                              | Apparent oral dose volume of distribution                                                                                                                                                                                                                                                                        |
| Fluctuation                                          | Steady-state fluctuation ( $(C_{max} - C_{min})/C_{ave}$ )                                                                                                                                                                                                                                                       |

In addition, the following PK parameters may be calculated, whenever possible, for each subject based on the urine INCB054828 concentrations:

|                     |                                                                    |
|---------------------|--------------------------------------------------------------------|
| $A_e$               | Amount of drug excreted in the urine over sampling interval        |
| $Cl_r$              | Renal clearance, where $Cl_r = A_e/AUC$                            |
| % Excreted or $f_e$ | percent excreted in the urine, where % Excreted = $100 (A_e/dose)$ |

Pharmacokinetic calculations will be performed, if appropriate, using commercial software such as WinNonlin<sup>®</sup>. Additional details of analyses will be described in the statistical analysis plan.

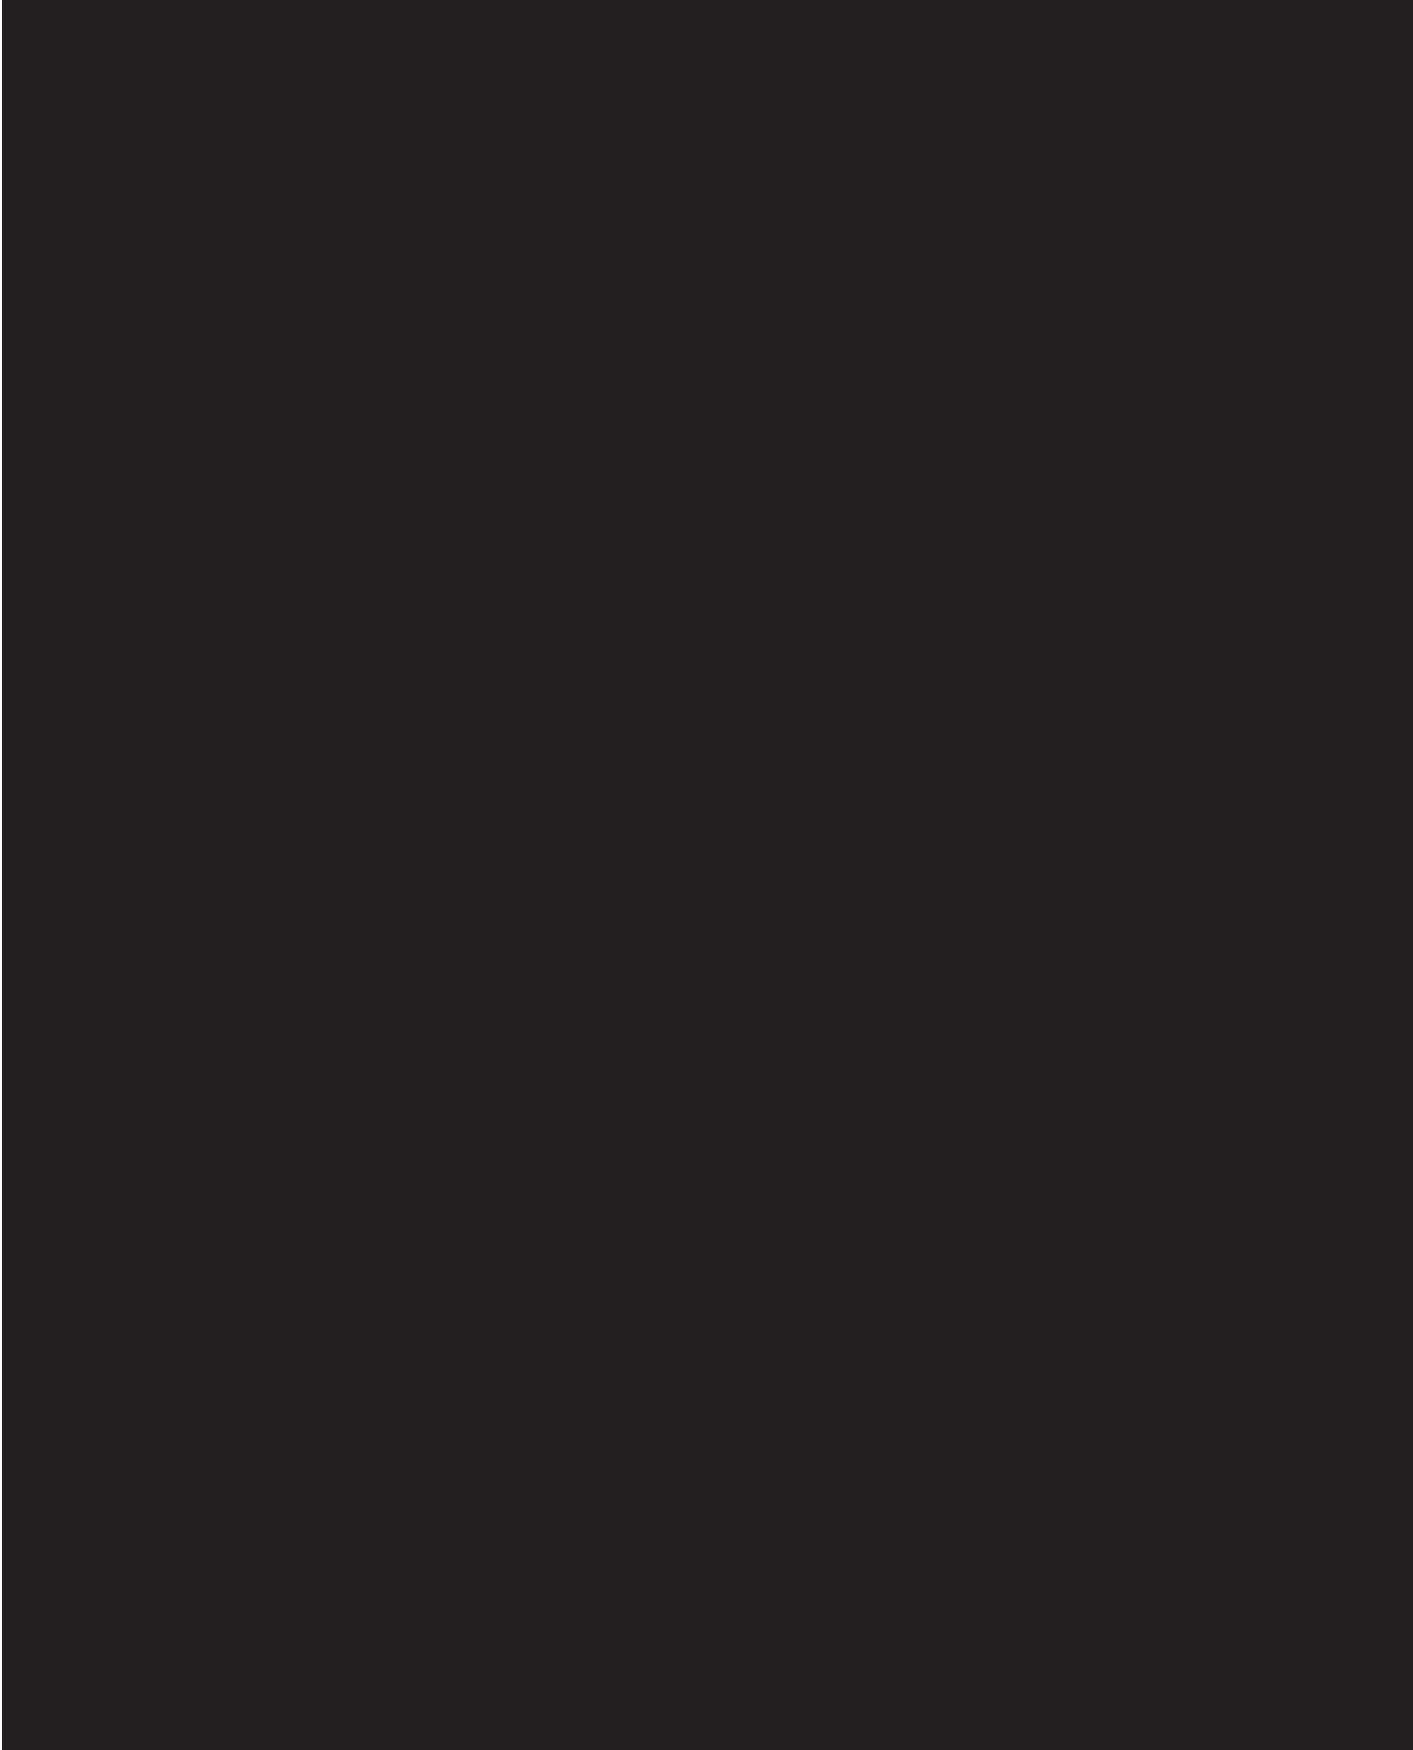



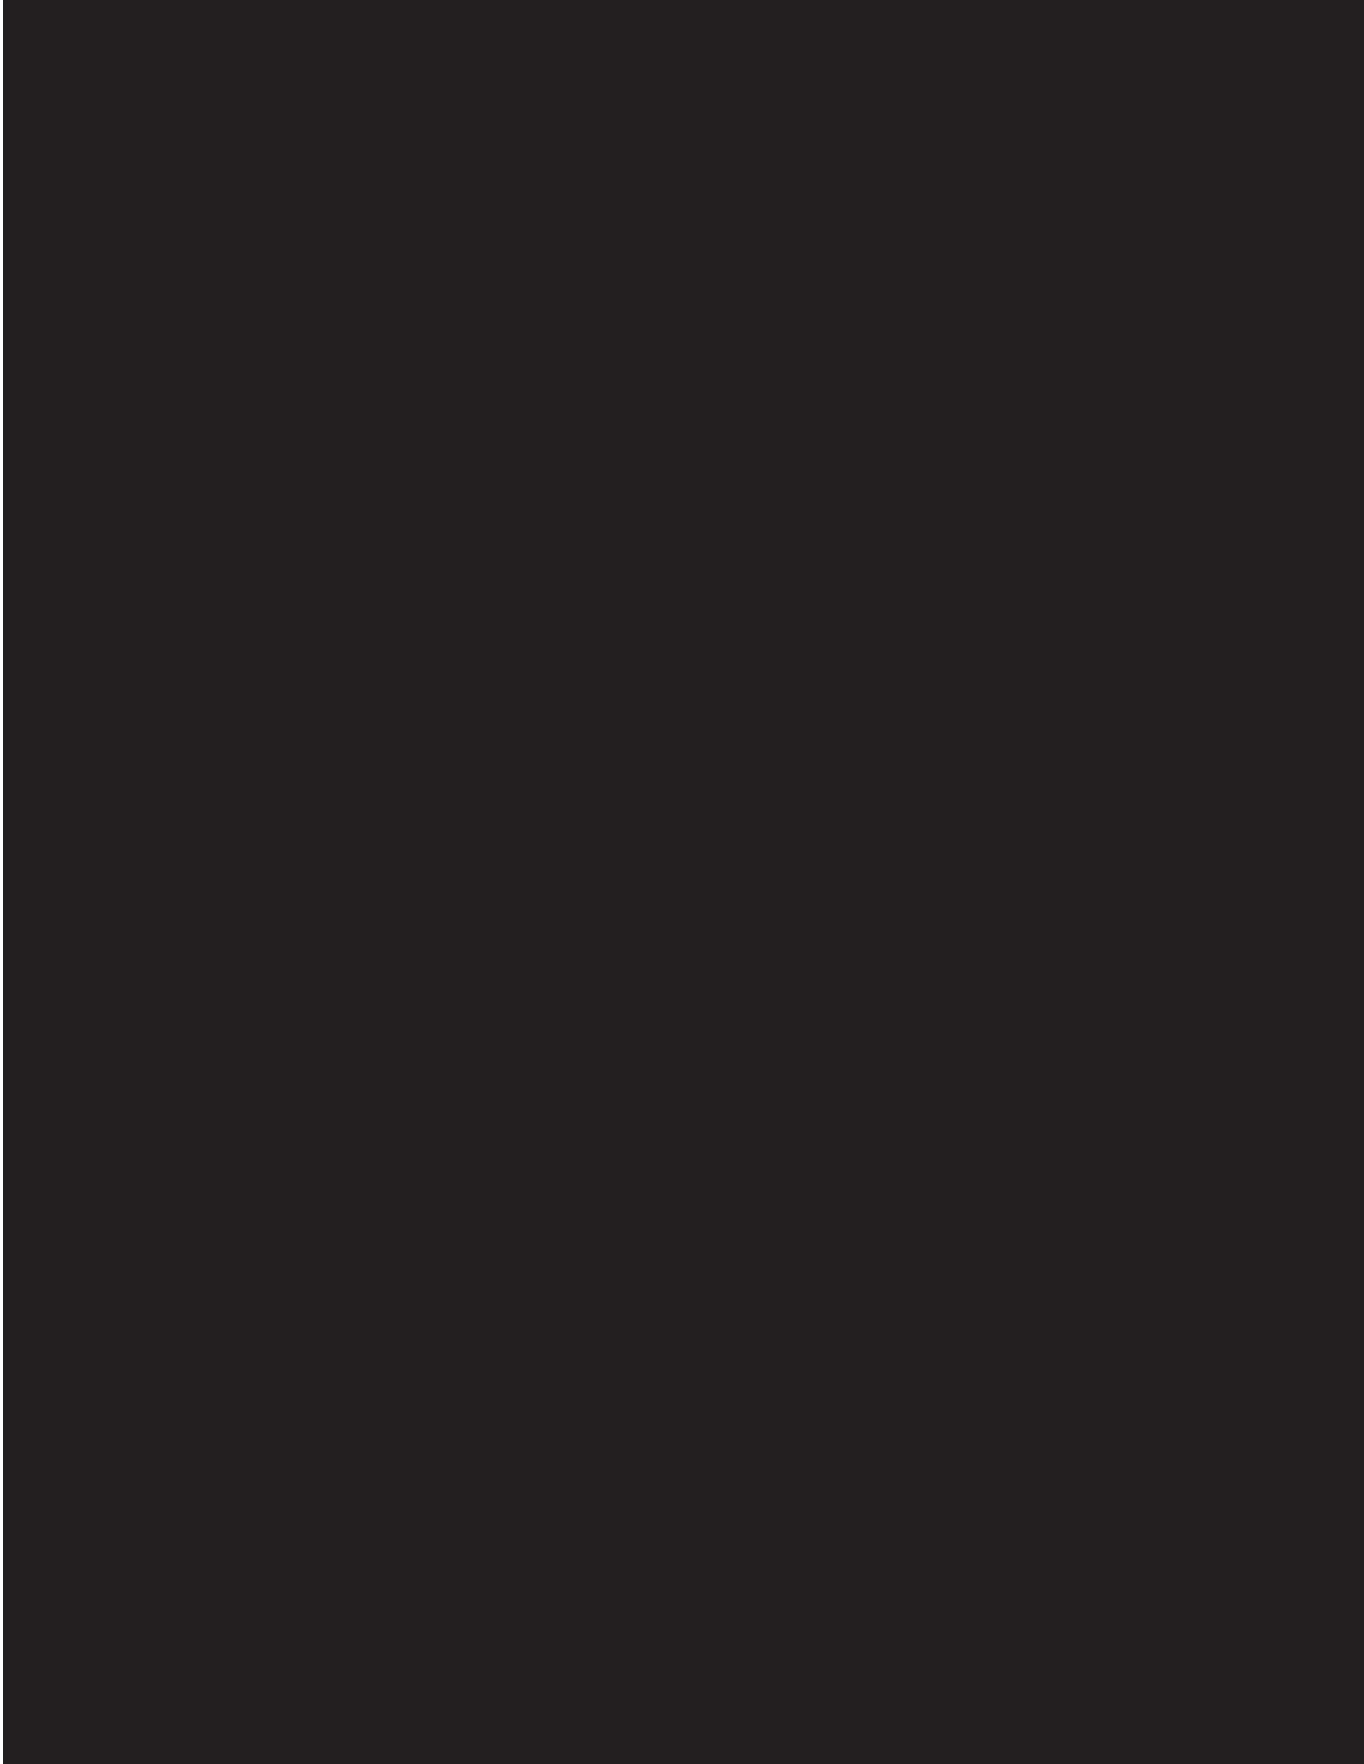

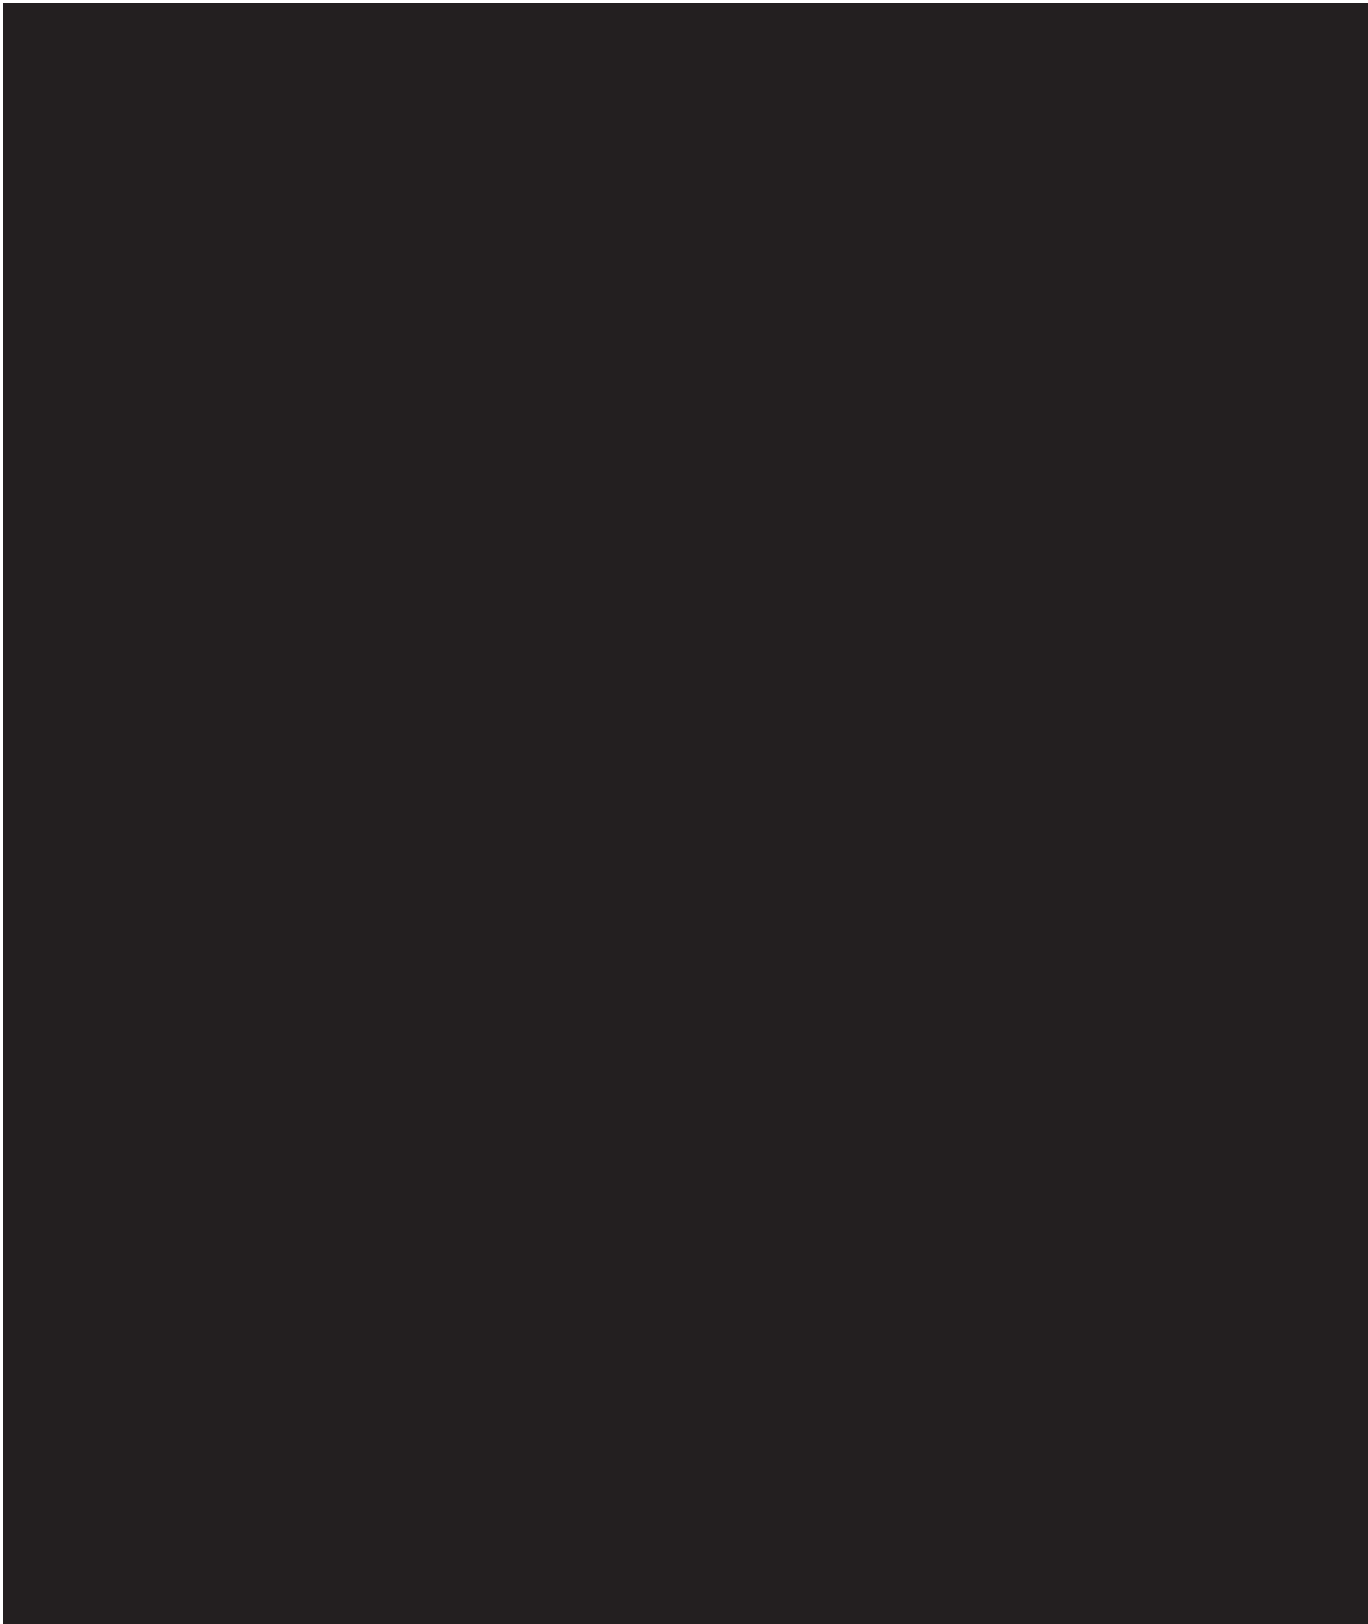

## APPENDIX E. PROTOCOL AMENDMENT SUMMARY OF CHANGES

| Document               | Date        |
|------------------------|-------------|
| Amendment (Version) 1: | 14 SEP 2016 |
| Amendment (Version) 2: | 05 DEC 2016 |
| Amendment (Version) 3: | 18 JAN 2017 |
| Amendment (Version) 4: | 21 MAR 2017 |
| Amendment (Version) 5: | 03 OCT 2017 |
| Amendment (Version) 6: | 15 FEB 2018 |

### Amendment 6 (15 FEB 2018)

#### Overall Rationale for the Amendment:

The primary purpose of this amendment is to ensure the study population is clearly identified, to provide guidelines for dose reductions, and to provide additional language for ophthalmologic testing and hyperphosphatemia grading.

#### 1. Synopsis; Section 1.1, Background; Section 3.1, Subject Inclusion Criteria

**Description of change:** References to the study population were updated to specify subjects with *advanced/metastatic or surgically unresectable* cholangiocarcinoma.

**Rationale for change:** To clarify the study population, [REDACTED]

#### 2. Section 1.2, Study Rationale

**Description of change:** Updated data from the study by Javle et al.

**Rationale for change:** To reflect the most recently published data from the study.

#### 3. Section 1.3.3, Phototoxicity

**Description of change:** Deletion of precautionary statement based on preclinical data.

**Rationale for change:** To match the findings in the Investigator's Brochure.

#### 4. Section 5.4.2, Criteria and Procedures for Dose Interruptions and Adjustments of Study Drug

**Description of change:** Language was added to include actual doses for reduction, if needed.

**Rationale for change:** To clarify dose reduction levels, [REDACTED]

#### 5. Section 7.5.5, Comprehensive Eye Examination

**Description of change:** Text was revised to add a funduscopy with digital imaging as part of the comprehensive eye examination and to clarify when additional assessments should be performed.

**Rationale for change:** To clarify the required and additional assessments.

6. **Section 8.1.2, Reporting**

**Description of change:** The adverse events reporting section was updated to include specific guidance on grading hyperphosphatemia.

**Rationale for change:** To provide clearer and more specific guidance on grading of hyperphosphatemia.

### **Amendment 5 (03 OCT 2017)**

The primary purpose of this amendment is to increase the total number of patients enrolled into the study.

1. **Synopsis; Section 4.1, Overall Study Design; Section 4.3.1, Planned Number of Subjects; Section 9.2, Selection of Sample Size**

**Description of change:** The total number of subjects was increased from 100 to 140; the number of subjects to be enrolled into Cohort A was increased from 60 to 100. The probability for showing a response has been changed from 80% to 95% based on the increased sample size of 100 subjects in Cohort A.

**Rationale for change:** To assure the most robust efficacy data to inform future development decisions.

2. **Synopsis; Section 3.1, Subject Inclusion Criteria; Section 4.1, Overall Study Design**

**Description of change:** The Cohort A population description was revised to include documented fusion partner in central laboratory report.

**Rationale for change:** To more clearly define the Cohort A population.

3. **Synopsis; Section 9.6, Futility Analysis**

**Description of change:** Added language to define criteria for futility and number of subjects on which the futility analysis will be based.

**Rationale for change:** To define the requirements for analysis and clarify that the number of patients the futility will be based on is the original cohort number of 60.

4. **Section 1.2, Study Rationale**

**Description of change:** The rationale for Amendment 5 has been added.

**Rationale for change:** To clarify why the current amendment is being implemented.

5. **Section 3.1, Inclusion Criteria; Section 7.5.6.4, Evaluation of FGF and FGFR Genetic Alterations; [REDACTED] FGF/FGFR Alterations**

**Description of change:** Language has been added to each section referencing new appendix with list of possible FGF/FGFR alterations. [REDACTED] has been added with a list of FGF/FGFR alterations.

**Rationale for change:** To provide a list in the Protocol of the types of FGF/FGFR alterations that can be considered eligible for this study.

6. **Incorporation of administrative changes.** Other minor, administrative changes have been incorporated throughout the Protocol and are noted in the redline version of the amendment.

#### **Amendment 4 (21 MAR 2017)**

The primary purpose of this amendment is to provide new language to allow subjects to enroll under local genomic testing results. Updated clinical experience data have been added as well.

- 1. Synopsis; Section 2.2, Study Endpoints; Section 3.1, Subject Inclusion Criteria; Section 4.1, Overall Study Design; Section 5.5.1, Withdrawal Criteria; Section 6.1, Prescreening and Screening; Section 7.5.6.4, Evaluation of FGF and FGFR Genetic Alterations; Section 9, Statistics**

**Description of change:** Language was added to the Protocol allowing subjects to enroll in the study based on local genomic testing results, with final results determined by central genomics laboratory. Final cohort assignment for statistical analysis of primary and secondary endpoints will be done based on the central genomics testing results.

**Rationale for change:** To expedite enrollment of subjects.

2.

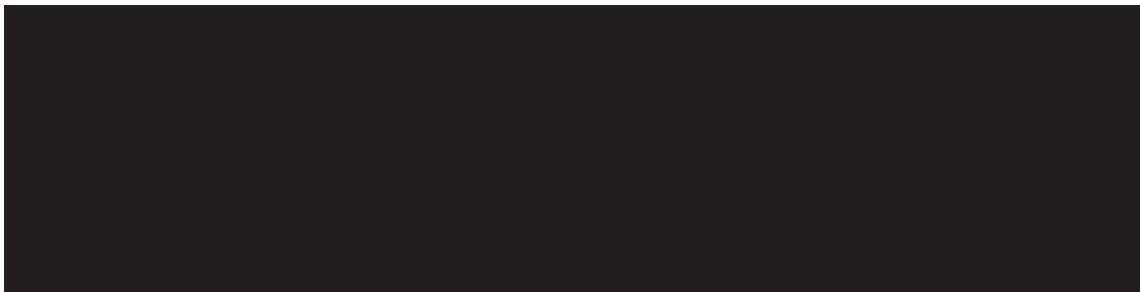

- 3. Synopsis; Section 3.2, Subject Exclusion Criteria**

**Description of change:** Exclusion criterion #17 regarding baseline eye abnormalities has been updated to include retinal disorder and to eliminate specific disorders.

**Rationale for change:** To ensure that the eye abnormalities for exclusion are more relevant.

- 4. Synopsis; Section 6, Study Assessments (Table 5, Study Assessments); Section 6.1, Prescreening and Screening; Section 7.1, Administration of Informed Consent Form**

**Description of change:** Prescreening details were revised to indicate that prescreening is available for subjects without a genomic testing report or a report that is more than 2 years old. Prescreening allows genomic testing to be performed outside of the 28-day screening window. Details regarding informed consent for prescreening were removed.

**Rationale for change:** To allow more flexibility for genomic testing in all potential subjects.

- 5. Section 1.3.2, Potential Risks of INCB054828 Based on Clinical Safety; Section 1.3.2.1, Pharmacokinetic/Pharmacodynamic Summary**

**Description of change:** Updated with new clinical and PK/PD data from the ongoing Phase 1/2 study (INCB 54828-101).

**Rationale for change:** To provide more clinical experience data.

6. **Section 6, Study Assessments (Table 6, Laboratory Assessments; Table 7, Laboratory Tests: Required Analytes); Section 7.8.5, Buccal Swab**

**Description of change:** Buccal swab has been removed from the Protocol.

**Rationale:** No longer required.

7.

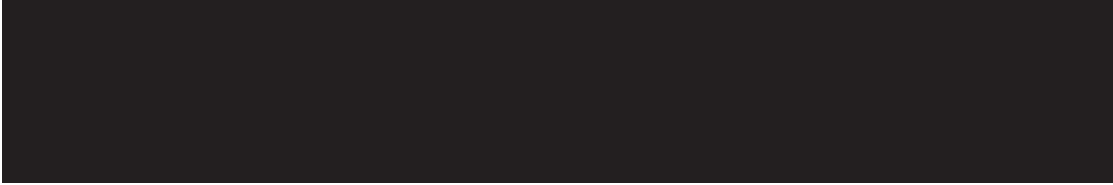

8. **Incorporation of administrative changes.** Other minor, administrative changes have been incorporated throughout the Protocol and are noted in the redline version of the amendment.

### **Amendment 3 (18 JAN 2017)**

The primary purpose of this amendment is to update the text in the Protocol [REDACTED] to clarify requirements for HIV screening and enrollment parameters for Cohort C.

1. **Synopsis; Section 2.2.2, Secondary Endpoints; Section 4.1, Overall Study Design; Section 9.2, Selection of Sample Size; Section 9.6, Futility Analysis**

**Description of change:** "US only" has been added after Cohort C.

**Rationale for change:** Only subjects from the United States will be allowed to enroll in Cohort C.

2. **Synopsis; Section 6, Study Assessments (Table 6, Laboratory Assessments; Table 7, Laboratory Tests: Required Analytes); Section 7.5.6.3, HIV Screening Test**

**Description of change:** Language was added to clarify that HIV screening is required for subjects enrolled outside of the United States.

**Rationale for change:** Requirement from [REDACTED] review.



## **Amendment 2 (05 DEC 2016)**

The primary purpose of this amendment is to update language based on Regulatory Agencies comments. Updates include but are not limited to clarification of inclusion and exclusion criteria, the addition of updated clinical experience data, and guidance for dose reductions.

### **1. Section 1.3.2, Potential Risks of INCB054828 Based on Clinical Safety**

**Description of change:** Language and data were added based on new information available from Study INCB 54828-101.

**Rationale for change:** Data included to update the Protocol and to better assess the benefit risk.

### **2. Section 1.3.3, Phototoxicity**

**Description of change:** This section was added to include language regarding potential phototoxicity of INCB054828.

**Rationale for change:** Cautionary update based on the unknown phototoxicity risk associated with INCB054828.

### **3. Section 3.1, Subject Inclusion Criteria; Section 3.2, Subject Exclusion Criteria**

**Description of change:** Inclusion criterion #9 and exclusion criterion #13 have been revised to include text to ensure that male subjects continue using contraception for 90 days after last dose (1 sperm cycle).

**Rationale:** Updated [REDACTED]

### **4. Section 3.2, Subject Exclusion Criteria**

**Description of change:** Exclusion criterion #2 was updated to ensure that treatment with study drug is not initiated before 28 days after completion of anticancer treatment.

**Rationale for change:** To reduce the time that subjects are held from treatment since the half-life of some compounds is long.

### **5. Section 3.2, Subject Exclusion Criteria**

**Description of changes:** Exclusion criterion #6 (abnormal laboratory parameters) was revised to include low potassium, exclusion criterion #24 was added to require HIV screening (for subjects outside of the United States) and exclusion criterion #9 was updated to include language per the ICH guideline E14 on QTc prolongation. Exclusion criterion #25 was added to exclude subjects with vitamin D deficiencies who require high doses of supplements for their deficiency.

**Rationale for change:** Updated [REDACTED]

### **6. Section 5.4.4, Criteria for Permanent Discontinuation of Study Drug**

**Description of change:** Added QT/QTc criterion for stopping study drug.

**Rationale for change:** Updated to be in line with ICH E14.

**7. Synopsis; Section 6, Study Assessments (Table 5, Laboratory Assessments; Table 6, Laboratory Tests: Required Analytes); Section 7.5.6.1, Pregnancy Testing**

**Description of change:** Added urine pregnancy test on Day 1 of every cycle before dose administration.

**Rationale for change:** Updated to test for pregnancy before the start of each cycle.

**8. Section 5.4.2, Criteria and Procedures for Dose Interruptions and Adjustments of Study Drug**

**Description of change:** Added language to provide more instructions for dose reductions.

**Rationale for change:** Updated [REDACTED]

**9. Section 5.5, Withdrawal of Subjects From Study Treatment**

**Description of change:** Text was added to clarify that subjects may discontinue treatment but remain on the study for follow-up assessments. Additional text was added to clarify that subjects who retrospectively do not meet inclusion/exclusion criterion may be allowed to stay on treatment if they are receiving clinical benefit.

**Rationale for change:** Updated [REDACTED]

**10. Incorporation of administrative changes.** Other minor, administrative changes have been incorporated throughout the Protocol and are noted in the redline version of the amendment.

**Amendment 1 (14 SEP 2016)**

The primary purpose of this amendment is to amend the language regarding subjects to whom the [REDACTED] can be administered.

1.

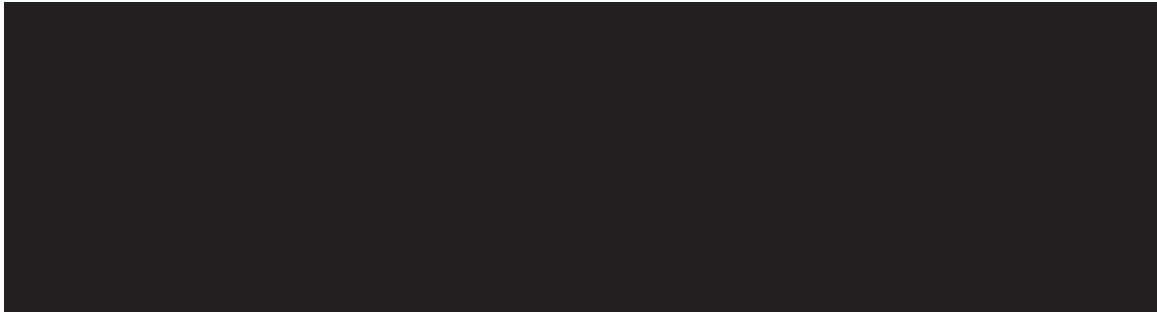

## Signature Manifest

**Document Number:** IC-DEV-PROT-AMEND-0324  
**Title:** INCB 54828-202 Protocol Amendment 6

**Revision:** 0

All dates and times are in Eastern Standard Time.

### APPROVAL: 54828-202 Amendment 6

#### Approval and Release

| Name/Signature | Title      | Date                     | Meaning/Reason |
|----------------|------------|--------------------------|----------------|
| [REDACTED]     | [REDACTED] | 15 Feb 2018, 12:46:44 PM | Approved       |
| [REDACTED]     | [REDACTED] | 15 Feb 2018, 12:50:07 PM | Approved       |
| [REDACTED]     | [REDACTED] | 15 Feb 2018, 12:50:09 PM | Approved       |
| [REDACTED]     | [REDACTED] | 15 Feb 2018, 04:27:49 PM | Approved       |
